# Supplementary material for: A physical map of traits of agronomic importance based on potato and tomato genome sequences
Source: Front Genet. 2023 Jul 25;14:1197206. doi: 10.3389/fgene.2023.1197206 (PMC10411547; doi:10.3389/fgene.2023.1197206)
Supplement: Supplementary file 2 [file Table3.XLSX]

## Sheet: Chromosome 3
Markers included in Figure 3 are labelled with *	Colour codes: Bright green: Resistance to oomycete (Phytophthora). Dull green: Resistance to fungus. Purple: Resistance to bacterium. Blue: Resistance to virus. Magenta: Resistance to nematode. Red: Resistance to insect. Orange: QTL for sugar content. Yellow: QTL für yield. Maroon: QTL for maturity.				Green: Candidate genes for QRL. Yellow: Candidate genes for yield. Blue: Central metabolism genes. Orange: Carbohydrate metabolism genes, candidate genes for sugar content.			Tomato mapping population: Tomato-EXPEN 1992 (Sl_VF36xLA716), Tanksley et al. (1992) Genetics 132, 1141-1160		Potato mapping population: Potato TxB 1992 (N263), Bonierbale et al. (1988) Genetics 120, 1095-1103		Potato mapping population: Ghislain et al. (2009) Mol. Breed. 23, 377-388		Potato mapping population: Feingold et al. (2005) Theor. Appl. Genet. 111, 456-466		Potato mapping population: F1840, Gebhardt et al. (1991) Theor. Appl. Genet. 83, 49-57		Potato mapping population: BC9162, Gebhardt et al. (1989) Theor. Appl. Genet. 78, 65-75		Identical genes matching to different markers or loci are indicated with #	Identical genes matching to different markers or loci are indicated with #	Colour codes as in columns B and C. Inversions and translocations are framed in black	Differences of physical marker order of version v4.03 versus v6.1 are indicated by red numbers. Colour codes as in columns B and C.	Colour codes as in columns B and C. Inversions and translocations are framed in black	Identical genes matching to different markers or loci are indicated with #
Chromosome	Marker or gene, mapped directly by sequence alignment	R gene, QRL or QTL, mapped indirectly by sequence alignment of linked, associated and flanking markers	Origin of marker or trait	Numerical codes of references (see Table S15)	Marker or locus description	Marker or locus category	Sequence source: Accession(s), database, reference	Marker	Marker position [cM]	Marker	Marker position [cM]	Marker	Marker position [cM]	Marker	Marker position [cM]	Marker	Marker position [cM]	Marker	Marker position [cM]	Potato locus (DM1-3 v4.03)	Potato locus (DM1-3 v6.1)	Potato position chr03 (DM1-3 v6.1) [bp]	Potato position chr03 (DM1-3 v4.03) [bp]	Tomato position (SL4.0chr03) [bp]	Tomato locus (SL4.0chr03)
3	TG479		S. lycopersicum	19,32,89,242	Tomato STS marker, North border of tomato IL3-1, linked to tomato resistance locus py-1	STS (sequence-tagged-site)	TG479, SGN	TG479	0											PGSC0003DMG400013379	Soltu.DM.03G000100	00274477..275793	00214740..217420	00057119..58399	Solyc03g005050
3	Solyc03g005100		S. lycopersicum	337	Tomato candidate gene (alpha/beta-Hydrolases superfamily protein) for tomato QTL for soluble solids content (Brix) (tSS3.1), associated with tomato soluble solids content	Gene	Solyc03g005100, SGN													not annotated	Soltu.DM.03G000140	00307651..311083	00248126..251556	00083289.. 86727	Solyc03g005100
3	PQ-lr		S. tuberosum	294,341	Lysosomal Cystine Transporter (LCT) family protein, PQ-loop repeat family protein, in potato differential expression between quantitative late blight resistant and susceptible genotype pools, functional candidate gene for potato late blight QRL	Gene	Spud DB													PGSC0003DMG400013431	Soltu.DM.03G000160	00317514..313292	00253770..257990	00093894..89650	Solyc03g005120
3	St_At4g14570		S. tuberosum	212	Potato ortholog of Sl_At4g14570 (acylaminoacyl-peptidase-related gene)	COS2 (conserved orthologous sequence)	At4g14570, TAIR									St_At4g14570	0.002			PGSC0003DMG400013444	Soltu.DM.03G000430	00450386..446117	00386600..393800	00213613..209679	Solyc03g005340
3	TG324		S. lycopersicum	19,89,311,321	Tomato STS marker, linked to tomato resistance locus py-1, linked to tomato QTL for fruit weight, soluble solids (Brix), total sugar content and maturity	STS (sequence-tagged-site)	TG324, SGN	TG324	3											not annotated	Soltu.DM.03G000470	00473876..474854	00416429..416864	00230703..231915	Solyc03g005380
3	TG56		S. lycopersicum	19,120,121,149,343	Tomato STS marker, flanking tomato late blight QRL, linked with pepper locus pvr1 and pepper QTL for resistance to potyvirus	STS (sequence-tagged-site)	TG56, SGN	TG56	14	TG56	0									not annotated	Soltu.DM.03G000510	00547089..547467	00491500..491882	00311226..311782	Solyc03g005430
3	TG40		S. lycopersicum	19,89,242	Tomato STS marker, on tomato IL3-1, linked to tomato resistance locus py-1	STS (sequence-tagged-site)	TG40, SGN	TG40	3	TG40	0									not annotated	Soltu.DM.03G000510	00557687..558235	00502302..502862	00321587..322107	Solyc03g005430
3	Pt2		S. tuberosum	2,52	Inorganic phosphate transporter 2, membrane transport, functional candidate gene for potato tuber quality QTL	Gene	X98891, NCBI									Pt2	0.001			PGSC0003DMG400013451, PGSC0003DMG400013403	Soltu.DM.03G000590(a), Soltu.DM.03G000610(b)	00664102..662344(a), 00673682..672073(b)	00617930..619710	00405389..403663(a), 00417433..419079(b)	Solyc03g005530(a), Solyc03g005555
3	DMG400013456		S. tuberosum	253	Heterogeneous nuclear ribonucleoprotein 27C, gene with differential SNP allele frequency between pairs of potato genotype pools with differential tuber yield, SNPs causing amino acid changes, candidate gene for potato tuber yield QTL	Gene	Spud DB, SGN													PGSC0003DMG400013456	Soltu.DM.03G000730	00737332..733232	00680990..685330	00493133..489269	Solyc03g005680
3	TG135 (CAB3)		S. lycopersicum	9,19,89,90,119,185,218,227,242	Tomato STS marker, on tomato IL3-1, linked to potato QRL for late blight, flanking tomato and pepper potyvirus resistance genes, linked to tomato resistance locus py-1	STS (sequence-tagged-site)	Spud DB	TG135	7	TG135 (CAB3)	0	TG135	4	TG135	0					# PGSC0003DMG400013460, PGSC0003DMG400013461, PGSC0003DMG400013411 - PGSC0003DMG401013418	# Soltu.DM.03G000820 - Soltu.DM.03G000870	00796543..829842	00747250..779610	00545468..545733(a), 00547508..547773(b), 00543472..543207(c)	# Solyc03g005770(a), Solyc03g005780(b), Solyc03g005760(c)
3	At1A03 (AT2G34430)		A. thaliana	52,55	Arabidopsis EST marker (Chlorophyll ab binding protein, LHCP)	EST (expressed sequence tag)	X64459, NCBI									At1A3-b	0			# PGSC0003DMG401013418, PGSC0003DMG401013417, PGSC0003DMG401013415, PGSC0003DMG401013411, PGSC0003DMG401013414, PGSC0003DMG401013412 et al.	# Soltu.DM.03G000830(a), Soltu.DM.03G000840(b), Soltu.DM.03G000870(c)	00797904..798704(a), 00805152..805952(b), 820915..821715(c) et al.	00780590..779610	00545468..546268(a), 00547508..548308(b), 00543472..542672(c)	# Solyc03g005770(a), Solyc03g005780(b), Solyc03g005760(c)
3		tLBR3.1 (lb3)	S. lycopersicum, S. hirsutum	149	Tomato QTL for late blight resistance.	QRL (quantitative resistance locus)																		0 - 4 Mbp
3		pLBR3.1 (Pin3A)	S. tuberosum, S. berthaultii	29,50,90,173,227	Potato QTL for resistance to late blight	QRL (quantitative resistance locus)																0 - 6 Mbp	0 - 6 Mbp
3		py-1	S. lycopersicum	10,89	Tomato recessive gene for resistance to corky root rot (Pyrenochaeta lycopersici)	recessive resistance locus																		0 - 0,7 Mbp
3*	eIF4E		S. lycopersicum	167	Eukaryotic translation initiation factor 4E	Gene	AF259801, NCBI													# PGSC0003DMG400013421	# Soltu.DM.03G000970	00879650..884125	00831274..835815	00594518..598290	# Solyc03g005870
3	pvr1,2,5		C. chinense, C. annuum	10,119,120,121,122,343	Pepper recessive gene for resistance to potyvirus	recessive resistance gene	AY485127 - AY485131, AF521964, NCBI													# PGSC0003DMG400013421	# Soltu.DM.03G000970	00879650..884125	00831259..835952	00594552.. 597703	# Solyc03g005870
3	pot-1		S. habrochaites (L. hirsutum)	119,167	Tomato recessive gene for resistance to potyvirus from L. hirsutum	recessive resistance gene	AY723736, NCBI													# PGSC0003DMG400013421	# Soltu.DM.03G000970	00879684..883607	00831274..835815	00594552.. 597703	# Solyc03g005870
3		qPvr3.1 (q_pvr)	C. annuum	10,120	Pepper QTL for resistance to potyvirus	QRL (quantitative resistance locus)																~ 0 - 3 Mbp	~ 0 - 3 Mbp	0 - 2 Mbp
3	TG131		S. lycopersicum	19	Tomato STS marker	STS (sequence-tagged-site)	TG131, SGN			TG131	2.6											no matching position(chr07 & 2)	no matching position(chr07 & 2)	no matching position(chr07 & 2)
3	CT31		S. lycopersicum	19,89,119,321	Tomato EST marker, flanking tomato loci pot-1 and py-1, pepper loci pvr2/pvr5, proximal to tomato QTL for fruit soluble solids (Brix) and total sugar content	EST (expressed sequence tag)	AA824734, NCBI	CT31A	8.8											PGSC0003DMG400026744	Soltu.DM.03G001350	01281093..1280586	01277404..1276897	00774506..774000	Solyc03g006070
3*	S1h5		S. tuberosum	52,55	Potato EST marker (Dormancy associated protein)	EST (expressed sequence tag)	AJ489129, NCBI									S1h5-a	6			PGSC0003DMG400012826	Soltu.DM.03G001970	01887833..1889986	01802810..1799680	00970363..972770	Solyc03g006360
3	TG585		S. lycopersicum	19,32,324	Tomato STS marker, distal to tomato IL3-2, on IL3-1, distal to tomato QTL tFY3.1 for fruit total yield	STS (sequence-tagged-site)	TG585, SGN	TG585	18.8											PGSC0003DMG400005040	Soltu.DM.03G002400	02314964..2315463	02216110..2217768	01275887..1277594	Solyc03g006660
3	TG114		S. lycopersicum	19,314	Tomato STS marker linked to tomato QTL for maturity	STS (sequence-tagged-site)	TG114, SGN	TG114	14											not annotated	Soltu.DM.03G002510	02393727..2398789	02301781..2302680	01317416..1318454	Solyc03g006720
3	TG132		S. lycopersicum	19,120	Tomato STS marker, linked to pepper QTL for resistance to potyvirus	STS (sequence-tagged-site)	TG132, SGN	TG132	27											PGSC0003DMG400005045(a), PGSC0003DMG400005044(b)	Soltu.DM.03G002520(a), Soltu.DM.03G002510 (b)	02402275..2401763(a),02397250..2396746(b)	02311699..2311187(a), 02306674..2306171(b)	01326640..1326128	Solyc03g006730
3		tM3.1 (mat3.1)	S. lycopersicum, S. peruvianum	311,314	Tomato QTL for maturity	QTL (quantitative trait locus)																		~ 0 - 2 Mbp
3		tSS3.1 (sugs3.1, brx3.1)	S. lycopersicum, S. parviflorum	242,321,337	Tomato QTL for fruit total sugar content (soluble solids, Brix)	QTL (quantitative trait locus)																		0 - 1 Mbp
3		tFW3.1 (fw3.1)	S. lycopersicum, S. peruvianum	311,337	Tomato QTL for fruit weight	QTL (quantitative trait locus)																		0 - 3 Mbp
3		tFY3.1 (yld3.1)	S. lycopersicum, S. pennellii	324	Tomato QTL for fruit total yield	QTL (quantitative trait locus)																		1 - 3 Mbp
3	S1d4		S. tuberosum	52	Potato EST marker (Ribosomal protein S35a, S37a, RS35a, RS37a)	EST (sequence-tagged-site)	AJ489116, NCBI									S1d4-c	9			PGSC0003DMG403024074	Soltu.DM.03G003000	02861635..2861176	02773763..2774223	52981875..52981647	Solyc03g096360
3	St_At1g65720		S. tuberosum	212	Potato ortholog of Sl_At1g65720	COS2 (conserved orthologous sequence)	At1g65720, TAIR									St_At1g65720	10			PGSC0003DMG400024083	Soltu.DM.03G003130	03001094..3000040	02916000..2914950	04332902..4331862	Solyc03g031950
3	STM1053		S. tuberosum	16,218	Potato microsatellite marker in HMG CoA reductase	SSR (simple sequence repeat)	U51986,NCBI											STM1053	0	# PGSC0003DMG400018679	# Soltu.DM.03G003200	03108995..3105299	03011530..3015240	04410718..4409707(a), 04419972..4418963(b)	# Solyc03g032010(a), Solyc03g032020(b)
3	STM1019		S. tuberosum	16	Potato microsatellite marker in HMG CoA reductase	SSR (simple sequence repeat)	U51986,NCBI													# PGSC0003DMG400018679	# Soltu.DM.03G003200	03108995..3105299	03011530..3015240	04410718..4409707(a), 04419972..4418963(b)	# Solyc03g032010(a), Solyc03g032020(b)
3	STM1017		S. tuberosum	16	Potato microsatellite marker in HMG CoA reductase	SSR (simple sequence repeat)	L01402, NCBI													# PGSC0003DMG400018679	# Soltu.DM.03G003200	03108729..3105352	03014962..3014218	04410718..4409707(a), 04419972..4418963(b)	# Solyc03g032010(a), Solyc03g032020(b)
3*	TG605		S. lycopersicum	19	Tomato STS marker	STS (sequence-tagged-site)	TG605, SGN	TG605	49,3											# PGSC0003DMG400018681	# Soltu.DM.03G003250	03165717..3160550	03069779..3070299	04485597..4482820	# Solyc03g032070
3	TG526		S. lycopersicum	19	Tomato STS marker	STS (sequence-tagged-site)	TG526, SGN	TG526	47,5											# PGSC0003DMG400018681	# Soltu.DM.03G003250	03164930..3163671	03071562..3070303	04484825..4483580	# Solyc03g032070
3	3_3319080		S. tuberosum	50	Potato SNP marker, associated with potato resistance to late blight	SNP (single nucleotide polymorphism)	Ref. 50													# PGSC0003DMG400022524	# Soltu.DM.03G003450	03423579..3429557	03319080	04765226..4771128	# Solyc03g033320
3	TG520		S. lycopersicum	19	Tomato STS marker	STS (sequence-tagged-site)	TG520, SGN	TG520	49,3											# PGSC0003DMG400022524	# Soltu.DM.03G003450	03426814..3425420	03319726..3318332	04768405..4767004	# Solyc03g033320
3	STG0002		S. tuberosum	218	Potato microsatellite marker in potato EST	SSR (simple sequence repeat)	BE471901, NCBI					STG0002	0							not annotated	not annotated	03727452..3727318	03626071..3625832	04978987..4975817	Solyc03g033560
3	solcap_snp_c1_5365		S. tuberosum	383	Potato SNP marker, flanking potato QTL for resistance to Ralstonia solanacearum	SNP (single nucleotide polymorphism)	Spud DB, http://solcap.msu.edu/potato													PGSC0003DMG400022537	Soltu.DM.03G003790	03870125..3870025	03779360..3779381	05091626..5091526	Solyc03g033630
3	GP510		S. tuberosum	13,52	Potato STS marker	STS (sequence-tagged-site)	AJ487364, NCBI									GP510	12			PGSC0003DMG401022579	Soltu.DM.03G004160	04334506..4335100	04259140..4254230	05582514..5583450	Solyc03g034010
3*	RbcS (CP15)		S. tuberosum	1,2,6,7,8,13,52,173,212	Ribulose bisphosphate carboxylase, small subunit (EC4.1.1.39), Calvin cyle, photorespiration, candidate gene for tuber quality QTL, linked to potato QRL for late blight	Gene	J03613, NCBI									RbcS-1	13.002	RbcS-1	7.001	PGSC0003DMG400019584	Soltu.DM.03G004480	04672078..4674302	04728920..4731140	05788936..5791123	Solyc03g034220
3	CP116		S. tuberosum	19,32	Potato EST marker, North of tomato IL3-3, on IL3-2	EST (expressed sequence tag)	CF802469, NCBI	CP116A	51,5											PGSC0003DMG402016696 & PGSC0003DMG401016696	Soltu.DM.03G004780	05213185..5213586	05430150..5430551	06268823..6269224	Solyc03g034440
3	CT225		S. lycopersicum	19,212	Tomato EST marker	EST (expressed sequence tag)	CT225, SGN	CT225B	49,3											not annotated(a,b,d), PGSC0003DMG400031457(c)	not annotated(a,b), Soltu.DM.03G011450(c)	05253092..5253533(a), 05260971..5261412(b), 31839217..31839658(c) et al.	05475282..5474841(a), 05513428..5512987(b), 17248908..17249349(c), 05524367..5523926(d)	06311948..6311507(a), 15893355..15893796(b), 44839620..44839195(c)	Solyc03g042560(a), Solyc03g071855(b), Solyc03g078280(c)
3	Pal		S. tuberosum	9,29,212	Phenylalanine ammonia lyase, clustered gene family, pathogenesis related, functional candidate genes for QTL for resistance	Gene	X63104, NCBI									Pal-f	13.001			not annotated	Soltu.DM.03G004920(a), Soltu.DM.03G004870(b)	05304245..5306559(a), 05254929..5256907(b) et al.	05523290..5524650	06310141..6312229(a), 15894426..15893074(b) et al.	Solyc03g042560(a), Solyc03g071870(b)
3		pBWR3.1 (qBWR-2)	S. tuberosum	383	Potato QTL for resistance to Ralstonia solanacearum (bacterial wilt)	QRL (quantitative resistance locus)																(4 - 30 Mbp)	(4 - 15 Mbp)
3*	solcap_snp_c2_50637		S. tuberosum	383	Potato SNP marker, linked to potato QTL for resistance to Ralstonia solanacearum	SNP (single nucleotide polymorphism)	Spud DB, http://solcap.msu.edu/potato													PGSC0003DMG400016685	Soltu.DM.03G005050	05533333..5537114	05764649..5764670	06631015..6634730	Solyc03g043770
3	P8f11		S. tuberosum	52,55	Potato EST marker (Ribosomal protein L3)	EST (expressed sequence tag)	AJ487450, NCBI									P8f11-a	17.001			not annotated	Soltu.DM.03G005350	06370796..6370623	06752071..6751911	15125195..15125957(a), 08618741..8619571(b)	not annotated(a,b)
3	STM0040		S. tuberosum	16	Potato microsatellite marker	SSR (simple sequence repeat)	Ref. 16													intergenic	intergenic	09615786..9615763	10309843..10309820	31732498..31732475	intergenic
3*	solcap_snp_c2_5742		S. tuberosum	294	Potato SNP marker, associated with potato plant maturity	SNP (single nucleotide polymorphism)	Spud DB, http://solcap.msu.edu/potato													PGSC0003DMG400018762	Soltu.DM.03G006440	09686913..9696584	10383447..10383468	10879001..10878901	not annotated
3	P1f11		S. tuberosum	52.55	Potato EST marker (Ribosomal protein L24, RL24)	EST (expressed sequence tag)	AJ487402, NCBI									P1f11-c	17.002				not annotated	13936004..13936387	no matching position (chr09 & 10)	no matching position (chr09 & 10)
3	GP35		S. tuberosum	17,31	Potato STS marker, linked to potato QTL for resistance to late blight	STS (sequence-tagged-site)	CG783250, NCBI													PGSC0003DMG400029865	Soltu.DM.03G007620	16395433..16394813	26873114..26873498	23962694..23963237(a), 07164026..7164627(b), 07167313..7166703(c)	not annotated (a), Solyc03g150112(b), Solyc03g150112(c)
3		pTSC3.1	S. tuberosum	196,235	Potato QTL for tuber sugar content (chip color)	QTL (quantitative trait locus)																~ 15 - 19 Mbp	?
3*	Stp23 (PHO1a)		S. tuberosum	2,196,197,235	Alpha-glucan phosphorylase (EC2.4.1.1), starch metabolism, functional candidate gene for tomato fruit and potato tuber starch and sugar content QTL, associated with potato tuber sugar content and chip color	Gene	D00520, NCBI											Stp23	7.002	PGSC0003DMG400007782	# Soltu.DM.03G007760(a), Soltu.DM.03G007720(b)	16845715..16846142(a), 16822539..16822967(b)	chr00	37509473..37517942	# Solyc03g065340
3	P4e12		S. tuberosum	52	Potato EST marker (Starch phosphorylase)	EST (expressed sequence tag)	AJ487436, NCBI									P4e12	18.003			PGSC0003DMG400002479	# Soltu.DM.03G007720(a), Soltu.DM.03G007760(b)	16825724..16826662(a), 16848898..16849836(b)	chr00	37509473..37517942	# Solyc03g065340
3	DMG400017855		S. tuberosum	253	Conserved gene of unknown function, with differential SNP allele frequency between pairs of potato genotype pools with differential tuber yield, SNPs causing amino acid changes, candidate gene for potato tuber yield QTL	Gene	Spud DB, SGN													PGSC0003DMG400017855	Soltu.DM.03G008870	22158667..22158149	18635510..18636030	no matching position
3	STM0047		S. tuberosum	16	Potato microsatellite marker	SSR (simple sequence repeat)	Ref. 16													intergenic	intergenic	23198671..23198524	19689666..19689502	no sequence homology
3	Solyc03g063500		S. lycopersicum	337	Tomato candidate gene (NADH-quinone oxidoreductase subunit N, oxidation/reduction) for tomato QTL for fruit weight (tFW3.2), associated with tomato fruit weight	Gene	Solyc03g063500, SGN															no matching position (chr10, chr05)	no matching position (chr10, chr05)	30625907..30625077	Solyc03g063500
3*	CT144		S. lycopersicum	19	Tomato EST marker	EST (expressed sequence tag)	AA824855 & AA824856, NCBI	CT144	55,8											PGSC0003DMG400014975	Soltu.DM.03G009880	26615404..26609757	23170305..23170049	30281170..30276556	Solyc03g063320
3	TG388		S. lycopersicum	19,310	Tomato STS marker, linked to tomato QTL ssc3.1 for soluble solids (Brix), fruight weight (fw3.1) and maturity (mat3.1)	STS (sequence-tagged-site)	TG388, SGN	TG388	55.8											PGSC0003DMG400002563	Soltu.DM.03G034910	58236726..58237178(a), 58140305..58139853(b)	59810815..59811347(a), 46678672..46678590(b)	26477477..26476944	Solyc03g061600
3	Solyc03g058370		S. lycopersicum	337	Tomato candidate gene (UDP-glucosyltransferase family 1 protein, abscisic acid glucosyltransferase) for tomato QTL for fruit weight (tFW3.), associated with tomato fruit weight	Gene	Solyc03g058370, SGN													PGSC0003DMG400005490	Soltu.DM.03G010940	29964988..29965899	15298707..15299618	20060042..20061777	Solyc03g058370
3		tM3.2 (mat3.1)	S. lycopersicum, S. pimpinellifolium	310	Tomato QTL for maturity	QTL (quantitative trait locus)																		~ 24 - 28 Mbp
3		tFW3.2 (fw3.1)	S. lycopersicum, S. pimpinellifolium	242,310,337	Tomato QTL for fruit weight	QTL (quantitative trait locus)																		19 - 31 Mbp
3		tSS3.3 (ssc3.1)	S. lycopersicum, S. habrochaites (L. hirsutum), S. pimpinellifolium	242,310,312	Tomato QTL for soluble solids (Brix)	QTL (quantitative trait locus)																		~ 13 - 28 Mbp
3*	solcap_snp_c2_10087		S. tuberosum	383	Potato SNP marker, flanking potato QTL for resistance to Ralstonia solanacearum	SNP (single nucleotide polymorphism)	Spud DB, http://solcap.msu.edu/potato													intergenic	Soltu.DM.03G010950	30030443..30030543	15354991..15355013	20073792..20073884	Solyc03g058390
3	TG39		S. lycopersicum	19,123,242	Tomato STS marker, on tomato IL3-2 and IL3-3, linked to tomato QTL for resistance to Tomato Yellow Leaf Curl Virus	STS (sequence-tagged-site)	TG39, SGN	TG39	58											intergenic(a), PGSC0003DMG400005498	Soltu.DM.03G010960	30039014..30039562(a), 29905765..29905204(b)	15363405..15363970(a), 15238621..15238047(b)	19976728..19976170(a), 20078620..20079186(b)	Solyc03g058350(a), Solyc03g058390(b)
3	TG366		S. lycopersicum	19	Tomato STS marker	STS (sequence-tagged-site)	TG366, SGN	TG366	54,8											PGSC0003DMG400013962	Soltu.DM.03G011170	30779474..30780298	16126241..16127065	29064988.. 29064177	Solyc03g06332004
3	St1.2.1		S. tuberosum	9,13,23,52,55,64	Resistance gene like (RGL) sequence	RGL sequence (resistance-gene-like)	U60070, NCBI									St1.2.1-b	18.002					no matching position (chr11)	no matching position (chr11)	18594410..18594598	Solyc03g053070
3	At1A09 (AT5G59910)		A. thaliana	52,55	Arabidopsis EST marker (Histone H2B)	EST (expressed sequence tag)	T22855, NCBI; AT5G59910, TAIR									At1A9-b	18.001			# PGSC0003DMG400016921	# Soltu.DM.03G011310	31487670..31488011	16887690..16887020	15141730..15142032	# Solyc03g071620
3	TG247		S. lycopersicum	19,242,312	Tomato STS marker, on tomato IL3-2 and IL3-3, linked to tomato QTL for soluble solids (Brix)	STS (sequence-tagged-site)	TG247, SGN	TG247	55,8											# PGSC0003DMG400016921	# Soltu.DM.03G011310	31487708..31490278	16887202..16889772	15141728..15144149	# Solyc03g071620
3*	GP303		S. tuberosum	7,8,18	Potato STS marker, linked to potao QTL for tuber yield	STS (sequence-tagged-site)	CG783233, NCBI											GP303	7.003	intergenic	intergenic	31775907..31776692	17220914..17221579	15813758..15814073	intergenic
3	TG401		S. lycopersicum	19	Tomato STS marker	STS (sequence-tagged-site)	TG401, SGN	TG401	55,8											PGSC0003DMG400031342	Soltu.DM.03G011540	32009310..32008107	31732712..31731303	44713032..44713691	Solyc03g078200
3	CT110		S. lycopersicum	19,32	Tomato EST marker, North border of tomato IL3-3, on IL3-2	EST (expressed sequence tag)	AA824813, NCBI	CT110C	54.8											# PGSC0003DMG400031345	# Soltu.DM.03G011620	32174720..32174799	31900910..31901017	44856788..44856895	# Solyc03g078290
3*	P3c9		S. tuberosum	52,55	Potato EST marker (Ribosomal protein S18, RS18)	EST (expressed sequence tag)	AJ487428, NCBI									P3c9-c	17.003			# PGSC0003DMG400031345	# Soltu.DM.03G011620	32174538..32176854	31903050..31900730	44856612..44858985	# Solyc03g078290
3*	GMPase (P3g6)		S. tuberosum	2,52,55,212	GDP-mannose pyrophosphorylase (EC2.7.7.13) (Potato EST marker P3g6), carbohydrate metabolism, functional candidate gene for potato tuber quality QTL	EST (expressed sequence tag)	AJ487434, AJ487323, AF022716, NCBI									P3g6-b	19			PGSC0003DMG400015098	Soltu.DM.03G012410	33547284..33544664	33494870..33497490	53658644..53661079	Solyc03g096730
3	StTinI		S. tuberosum	294,341,385	TMV-induced protein I, in potato differential expression between quantitative late blight resistant and susceptible genotype pools, expression up regulated upon infection with P. infestans, functional candidate gene for potato late blight QRL	Gene	Spud DB													PGSC0003DMG400016749	Soltu.DM.03G012630	34077993..34076925	34073640..34074710	53282778..53283417	Solyc03g096545
3	CP112		S. tuberosum	6,7,8,52,55	Potato EST marker (Plasma membrane intrinsic protein WC1A,B,C)	EST (expressed sequence tag)	AJ487323, NCBI									CP112-a	23	CP112-a	10	PGSC0003DMG400020742	Soltu.DM.03G012810	34498690..34499203	34637650..34639200	52837086..52836639	Solyc03g096290
3*	AMY3		S. tuberosum	235	Alpha-amylase (EC3.2.1.1), starch metabolism, functional candidate gene for potato tuber starch and sugar content QTL	Gene	A21347, NCBI													PGSC0003DMG400020603	Soltu.DM.03G013410	35837310..35840354	35999180..36002230	51471701..51468809	Solyc03g095710
3	solcap _snp_c1_15926		S. tuberosum	360	Potato SNP marker, flanking potato QTL for tuber reducing sugar content and chip color (L_early)	SNP (single nucleotide polymorphism)	Spud DB, http://solcap.msu.edu/potato													PGSC0003DMG400022947	Soltu.DM.03G013510	35962500..35965000	36151170..36151270	51375064..51371881	Solyc03g095620
3	TG575		S. lycopersicum	19	Tomato STS marker	STS (sequence-tagged-site)	TG575, SGN	TG575	55,8											PGSC0003DMG401005259	not annotated	36355054..36354834	36598912..36598692	50798580..50798812	Solyc03g095250
3*	CT170		S. lycopersicum	312	Tomato STS marker, linked to tomato QTL for maturity and fruit weight	EST (expressed sequence tag)	CT170, SGN	CT170	90											PGSC0003DMG400008328	Soltu.DM.03G014060	36847718..36847720	37074393..37074395	50096079..50096077	not annotated
3	St_At1g02140		S. tuberosum	212	Potato ortholog to Sl_At1g02140 (HAP1/MAGO/MEE63)	COS2 (conserved orthologous sequence)	At1g02140, TAIR									St_At1g02140	25			PGSC0003DMG400021002	Soltu.DM.03G014320	37220971..37219385	37493170..37497520	49867968..49869647	Solyc03g093680
3	CT82		S. lycopersicum	19,310	Tomato EST marker, linked to tomato QTL for total fruit yield	EST (expressed sequence tag)	CT82, SGN	CT82	56.8											PGSC0003DMG400010750	Soltu.DM.03G014550	37690966..37690522	38085359..38084915	49583631..49584079	Solyc03g093610
3	cLEX12O16b		S. lycopersicum	408	Tomato EST marker, flanking tomato QTL fw3.1 for fruit weight (mass)	EST (expressed sequence tag)	AW621560, NCBI													PGSC0003DMG400010753	Soltu.DM.03G014560	37746381..37746814	38141484..38141917	49500694..49500280	Solyc03g093560
3	CT118		S. lycopersicum	19	Tomato EST marker	EST (expressed sequence tag)	AA824823 & AA824822, NCBI	CT118B	55,8											PGSC0003DMG400036566(a), PGSC0003DMG400040046(b)	Soltu.DM.03G014570(a), Soltu.DM.03G014580(b)	37752666..37752766(a), 37757983..37758083(b)	38147821..38147921(a), 38153138..38153238(b)	49462275..49462163(a), 49500394..49500282(b), 49482540..49482429(c)	Solyc03g093540(a), Solyc03g093560(b), Solyc03g093550©
3	HXT(4)		S. lycopersicum	197	Hexose transporter, sugar transport, functional candidate gene for tomato fruit sugar QTL	Gene	AI774617, NCBI													PGSC0003DMG400018853	Soltu.DM.03G014690	37938121..37936115	38333775..38333141	49257813..49259312(a), 50651609..50652239(b)	Solyc03g093410(a), Solyc03g094170(b)
3	CT212		S. lycopersicum	19	Tomato EST marker	EST (expressed sequence tag)	AA824927 & AA824928, NCBI	CT212	55,8											PGSC0003DMG400014823	Soltu.DM.03G015040	38381830..38381565	38779359..38779094	48863528..48863792(a), 48842597..48842861(b), 48847772..48848036(c)	Solyc03g093130(a), Solyc03g093110(b), Solyc03g093120(c)
3*	Pain1		S. tuberosum	2,196,197,235,283,322	Potato soluble acid invertase (EC3.2.1.26), sucrose metabolism, functional candidate gene for potato tuber and tomato fruit sugar content QTL, associated with potato tuber sugar content (chip color)	Gene	X70368, NCBI													PGSC0003DMG400013856	Soltu.DM.03G015280	38808424..38812909	39255060..39259540	48433932..48429816	Solyc03g083910
3		pTSC3.2 (Sug3a)	S. tuberosum	59,196,235,283	Potato QTL for tuber sugar content (chip color)	QTL (quantitative trait locus)																37 - 41 Mbp	37 - 41 Mbp
3	solcap_snp_c2_37982		S. tuberosum	294	Potato SNP marker, associated with potato plant maturity	SNP (single nucleotide polymorphism)	Spud DB, http://solcap.msu.edu/potato													PGSC0003DMG400023001	Soltu.DM.03G015690	39493563..39493463	40248435..40248456	48105660..48105759	Solyc03g083570
3*	At2D06 (AT4G00100)		A. thaliana	52.55	Arabidopsis EST marker (Ribosomal protein S13, RS13)	EST (sequence-tagged-site)	R90398, NCBI; AT4G00100, TAIR									At2D6-a	27.002			PGSC0003DMG400023013	Soltu.DM03G015740	39569177..39566630	40321570..40324110	48048626..48051034	Solyc03g083530
3*	TG130		S. lycopersicum	19,32,218,227,242	Tomato STS marker, on tomato IL3-2, South of IL3-1, flanking potato QRL for late blight	STS (sequence-tagged-site)	TG130, SGN	TG130	30,4	TG130	10.4	TG130	13	TG130	15					PGSC0003DMG400031021	Soltu.DM03G016000	39930594..39929586	40783000..40781992	01787390..1788434	Solyc03g007180
3	TG564		S. lycopersicum	19,149	Tomato STS marker, linked with tomato late blight QRL	STS (sequence-tagged-site)	TG564, SGN	TG564	30,4											PGSC0003DMG400044110	Soltu.DM03G016020	39957551..39958057	40810732..40811238	01773336..1772859	Solyc03g007160
3	TG517		S. lycopersicum	19,32,324	Tomato STS marker, North border of tomato IL3-2, South border of IL3-1, linked to tomato QTL tFY3.1 for fruit total yield	STS (sequence-tagged-site)	TG517, SGN	TG517	24.2											not annotated	Soltu.DM03G016380	40501935..40500045	41408785..41406895	01476151..1477840	Solyc03g006900
3	PGM-3		S. tuberosum	19,197,235,322	Phosphoglucomutase, plastidic (EC5.4.2.2), sugar metabolism, functional candidate gene for potato tuber and tomato fruit sugar content QTL, associated with potato tuber yield and plant maturity	Gene	AJ240053, NCBI													not annotated	Soltu.DM03G016410	40597787..40597299	41510400..41493500	01420229..1427880	Solyc03g006870
3	FRK-3		S. tuberosum	235	Fructokinase (EC2.7.1.4), glycolysis, functional candidate gene for potato tuber quality QTL	Gene	U64817, NCBI													# PGSC0003DMG400024246	# Soltu.DM03G016430	40628932..40633657	41525810..41530530	01414441..1409776	# Solyc03g006860
3	solcap_snp_c2_42312		S. tuberosum	294,356	Potato SNP marker, associated with potato plant maturity and quantitative resistance to common scab	SNP (single nucleotide polymorphism)	Spud DB, http://solcap.msu.edu/potato													# PGSC0003DMG400024246	# Soltu.DM03G016430	40633157..40633257	41530079..41530100	01414441..1409776	# Solyc03g006860
3*	solcap_snp_c2_24983		S. tuberosum	360	Potato SNP marker, flanking potato QTL for tuber sugar content (chip color)(a_early)	SNP (single nucleotide polymorphism)	Spud DB, http://solcap.msu.edu/potato													PGSC0003DMG400024248	Soltu.DM03G016510	40738583..40738683	41645729..41645829	01363704..1363628	Solyc03g006820
3		tSS3.2 (ssc3.1)	S. lycopersicum, S. pimpinellifolium	242,309	Tomato QTL for fruit soluble solids (SS)	QTL (quantitative trait locus)																		3 - 6 Mbp
3		qTy3.1	S. chilense	123	Tomato QTL for resistance to Tomato Yellow Leaf Curl Virus (TYLCV)	QRL (quantitative resistance locus)																		(~2 - 22 Mbp)
3		EBR3.1	S. habrochaites (L. hirsutum)	262	Tomato QTL for resistance to early blight (Alternaria solani)	QRL (quantitative resistance locus)																		~ 2 - 6 Mbp
3		CSR3.1	S. tuberosum	356	Potato QTL for resistance to common scab (Streptomyces scabies)	QRL (quantitative resistance locus)																~ 38 - 42 Mbp	~ 39 - 43 Mbp
3		RSe-IIIa	S. tuberosum	247	Potato QTL for resistance to Synchytrium endobioticum	QRL (quantitative resistance locus)																~ 39 - 43 Mbp	~ 40 - 44 Mbp
3		pLBR3.2 (Pin3B)	S. tuberosum, S. berthaultii	3,9,17,181,227,240,356	Potato QTL for resistance to late blight	QRL (quantitative resistance locus)																40 - 45 Mbp	41 - 48 Mbp
3*	TG66		S. lycopersicum	19,123,185,242,262,309	Tomato STS marker, on tomato IL3-2, linked to tomato QTL for resistance to early blight, tomato yellow leaf curl virus and QTL for soluble solids (Brix)	STS (sequence-tagged-site)	TG66, SGN	TG66	50	TG66	14,3			TG66	18					# PGSC0003DMG400014261	# Soltu.DM03G016650	41008388..41011830	41990488..41990841	03763592..3760159	# Solyc03g026340
3	solcap_snp_c1_6869		S. tuberosum	247	Potato SNP marker, linked to potato QRL RSe-IIIa	SNP (single nucleotide polymorphism)	Spud DB, http://solcap.msu.edu/potato													# PGSC0003DMG400014261	# Soltu.DM03G016650	41009045..41009145	41992119..41992140	03762933..3762833	# Solyc03g026340
3	solcap_snp_c1_6853		S. tuberosum	247	Potato SNP marker, linked to potato QRL RSe-IIIa	SNP (single nucleotide polymorphism)	Spud DB, http://solcap.msu.edu/potato													PGSC0003DMG400014266	Soltu.DM03G016800	41164243..41168366	42154541..42154562	03667572..3662943	Solyc03g026240
3	solcap_snp_c1_6864		S. tuberosum	247	Potato SNP marker, linked to potato QRL RSe-IIIa	SNP (single nucleotide polymorphism)	Spud DB, http://solcap.msu.edu/potato													PGSC0003DMG400014316	Soltu.DM03G016890	41301395..41301295	42289077..42289098	03547075..3547175	Solyc03g026150
3	GP1		S. tuberosum	1,6,7,8,9,13,17,18,30,31,37,42,181	Potato STS marker, proximal to potato QRL Eca3A, linked to potato QTL for resistance to late blight and tuber yield	STS (sequence-tagged-site)	AJ492236 & AJ492235, NCBI									GP1-a	30	GP1-a	19	not annotated	Soltu.DM03G016900(a), Soltu.DM03G016980(b)	41331363..41331573(a), 41406554..41406764(b) et al.	42321197..42321419	03533847..3533616(a), 03527378..3527137(b)	Solyc03g026140(a), Solyc03g026130(b)
3	TG542		S. lycopersicum	19,149	Tomato STS marker, linked with tomato late blight QRL	STS (sequence-tagged-site)	TG542, SGN	TG542	49,3											PGSC0003DMG400014279	Soltu.DM03G017090	41478894..41479707	42464550..42469370	03463037..3462217	Solyc03g026070
3	CT263		S. lycopersicum	19	Tomato EST marker	EST (expressed sequence tag)	CT263, SGN	CT263	47.5											PGSC0003DMG400014284	Soltu.DM03G017160	41561658..41561243	42551716..42550063	03398668..3399103	Solyc03g026000
3	CT141		S. lycopersicum	19,309	Tomato EST marker, flanking tomato QTL for soluble solids (Brix)	EST (expressed sequence tag)	AA824852, NCBI	CT141	49,3 & 47,5											PGSC0003DMG400014339	Soltu.DM03G017530	41903617..41905013	42895089..42896485	03236846..3235371	Solyc03g025850
3	At2A02 (AT5G23860)		A. thaliana	52,55	Arabidopsis EST marker (beta-1,7,6,8,4,2/3 tubulin gene, TUB)	EST (expressed sequence tag)	T41808, NCBI; AT5G23860, TAIR									At2A2-e	27.001			PGSC0003DMG400014296	Soltu.DM03G017650	42027252..42029258	43024800..43019000	03122660..3121602	Solyc03g025730
3	CT278		S. lycopersicum	19	Tomato EST marker	EST (expressed sequence tag)	CT278, SGN	CT278	47,5											not annotated	Soltu.DM03G017810	42220498..42217902	43205143..43203445	03003517..3003874(a), 02966618..2966975(b)	not annotated(a,b)
3	P3d10		S. tuberosum	52,212	Potato EST marker (RNA polymerase I, II, III, 24.3 kDa)	EST (sequence-tagged-site)	AJ487430, NCBI									P3d10-a	35.001			PGSC0003DMG400019984	Soltu.DM03G017830	42259620..42262877	43247900..43242100	02942592..2941116	Solyc03g025070
3	GP35-p		S. tuberosum	17,31	Potato STS marker, linked to potato late blight QRL	STS (sequence-tagged-site)	CG783250, NCBI													intergenic	intergenic	42267843..42266914	43252025..43251705	23962694..23963237(a), 07164026..7164627(b)	intergenic(a), Solyc03g150112(b),
3	solcap_snp_c2_45703		S. tuberosum	294	Potato SNP marker, associated with potato plant maturity	SNP (single nucleotide polymorphism)	Spud DB, http://solcap.msu.edu/potato													PGSC0003DMG400015794	not annotated	42291510..42291610	43326972..43326993	02937355..2937255	Solyc03g025560
3	St_At5g23880		S. tuberosum	212	Potato ortholog to Sl_At5g23880 (gene encoding a protein similar to the 100kD subunit of cleavage and polyadenylation specificity factor, CPSF)	COS2 (conserved orthologous sequence)	At5g23880, TAIR									St_At5g23880	35.003			not annotated	Soltu.DM03G017880	42324979..42341900	43362000..43383400	02917620..2898855	Solyc03g025540
3	solcap_snp_c1_4444		S. tuberosum	356	Potato SNP marker, associated with potato QRL for late blight (rAUDPC)	SNP (single nucleotide polymorphism)	Spud DB, http://solcap.msu.edu/potato													PGSC0003DMG400010161	Soltu.DM03G018110	42574144..42574044	43603026..43602926	02733898..2733998	Solyc03g025310
3	StI013		S. tuberosum	185,218,219,253	Potato microsatellite marker in Fibrillarin homolog, associated with potato plant maturity, gene with differential SNP allele frequency between pairs of potato genotype pools with differential tuber yield, SNP causing amino acid change, candidate gene for potato tuber yield QTL	SSR (simple sequence repeat)	Ref. 185					StI0013	31	StI013	22	StI013	35.002			PGSC0003DMG400010119	Soltu.DM03G018150	42632247..42631998	43661740..43664810	02683699..2683949	Solyc03g025270
3	StI005		S. tuberosum	185,218	Potato microsatellite marker in potato EST	SSR (simple sequence repeat)	BE340719, NCBI							StI005a	20					PGSC0003DMG400010121	Soltu.DM03G018280	42772627..42772764	43813190..43815690	02604921..2604796	Solyc03g025170
3	TG13		S. lycopersicum	19,191	Tomato STS marker, flanking potato Y locus	STS (sequence-tagged-site)	TG13, SGN	TG13B	35	TG13B	10,4									not annotated	Soltu.DM03G018330	42821670..42821689	43864265..43864284	02574360..2574775	Solyc03g025140
3	TG525		S. lycopersicum	19	Tomato STS marker	STS (sequence-tagged-site)	TG525, SGN	TG525	47,5											PGSC0003DMG400010121 & PGSC0003DMG400010168	Soltu.DM03G018390 & Soltu.DM03G018400	42880655..42879165	43923162..43921672	02490522..2489001	Solyc03g007980
3	Y		S. phureja	191	Potato tuber flesh color	Morphological trait																42,8 - 49,2 Mbp	43,8 - 50,3 Mbp
3	bch (CHY2)		S. tuberosum	66	Potato beta-carotene hydroxylase 2, strong candidate gene for the Y locus	Gene	HM013963, NCBI													# PGSC0003DMG400010169(a), PGSC0003DMG400009501(b)	# Soltu.DM03G018410	42895872..42893621	43938548..43936296(a), 44053664..44052592(b)	02472842..2475073	# Solyc03g007960
3*	solcap_snp_c2_45505		S. tuberosum	294	Potato SNP marker, associated with potato QTL for plant maturity	SNP (single nucleotide polymorphism)	Spud DB, http://solcap.msu.edu/potato													# PGSC0003DMG400010169	# Soltu.DM03G018390 & Soltu.DM03G018410	42895832..42895732	43938468..43938447	02472869..2472969	# Solyc03g007960
3*	SPI		S. tuberosum	294,385	Serine protease inhibitor, Miraculin, in potato differential expression between quantitative late blight resistant and susceptible genotype pools, functional candidate gene for potato late blight QRL	Gene	Spud DB													PGSC0003DMG400010170	Soltu.DM03G018390 & Soltu.DM03G018450	42953124..42951735	49838680..49840070	55507064..55507471	Solyc03g098720
3	M16/M17		S. tuberosum	240	Potato microsatellite markers, associated with potato QRL for late blight (MCR)	SSR (simple sequence repeat)	Ref. 240													intergenic	intergenic	43069579..43069600	49715572..49715384	55486090..55486112	intergenic
3	CP133		S. tuberosum	6,7,8	Potato EST marker	EST (expressed sequence tag)	CF802473, NCBI											CP133	54	PGSC0003DMG400010136	Soltu.DM03G018390 & Soltu.DM03G018510	43071660..43072020	49714010..49713160	55500492.. 55500137	Solyc03g098710
3	CP6		S. tuberosum	1,2,3,6,7,8,9,13,17,18,19,30,31,52,57,59,212	Potato EST marker (Cysteine proteinase inhibitor), linked to potato late blight QRL and QTL for tuber sugar content (chip color) and yield	EST (expressed sequence tag)	AF500095, NCBI	CP6	61,1	CP6B	26.6					CP6	39.002	CP6	49.002	PGSC0003DMG400010137	Soltu.DM03G018390 & Soltu.DM03G018520	43096159..43097032	49685390..49686270	55492351..55492022	# Solyc03g098700
3	StKI-C		S. tuberosum	57,58	Potato Kunitz-type enzyme inhibitors, homology group C, clustered gene family, functional candidates for QTL for resistance	Gene	AY089961, NCBI													# PGSC0003DMG400010146(a), PGSC0003DMG400010143(b), PGSC0003DMG400010139(c), PGSC0003DMG400010134(d)	# Soltu.DM03G018650(a), Soltu.DM03G018580(b)	43332346..43332996(a), 43232978..43233637(b) et al.	49449129..49448479(a), 49549125..49548466(b), 49645238..49644579(c), 49785555..49784962(d)	55492733..55492091	# Solyc03g098700
3	KT-InvInh-3/2		S. tuberosum	196,235,294	Kunitz-type invertase inhibitor, in potato differential expression between quantitative late blight resistant and susceptible genotype pools, functional candidate gene for potato tuber reducing sugar content QTL and late blight QRL, associated with potato plant maturity	Gene	AF459077,AY594178,KC184127, NCBI													# PGSC0003DMG400010146	# Soltu.DM03G018650	43332343..43333089	49448370..49449160	55492733..55492070	# Solyc03g098700
3	solcap_snp_c2_20285		S. tuberosum	294	Potato SNP marker, associated with potato plant maturity	SNP (single nucleotide polymorphism)	Spud DB, http://solcap.msu.edu/potato													PGSC0003DMG400010147	Soltu.DM03G018670	43388749..43388649	49393372..49393393	no sequence homology
3	SUS-3		S. tuberosum	235	Sucrose synthase (EC2.4.1.13), sugar metabolism, functional candidate gene for potato tuber reducing sugar content QTL	Gene	Spud DB													PGSC0003DMG400031046	Soltu.DM03G019120	43857291..43856275	48949000..48950010	55147620..55148633	Solyc03g098290
3	solcap_snp_c2_20177		S. tuberosum	346	Potato SNP marker, linked with potato QTL for resistance to Tecia solanivora	SNP (single nucleotide polymorphism)	Spud DB, http://solcap.msu.edu/potato													PGSC0003DMG401031045	Soltu.DM03G019130	43862710..43862610	48943615..48943636	55142241..55142341	Solyc03g098280
3	St_At3g10220		S. tuberosum	212	Potato ortholog to Sl_At3g10220 (tubulin folding cofactor B)	COS2 (conserved orthologous sequence)	At3g10220, TAIR									St_At3g10220	39.004			PGSC0003DMG400031053	Soltu.DM03G019270	44010571..44014371	48785900..48793300	55017315..55013607	Solyc03g098170
3	TG222		S. lycopersicum	19	Tomato STS marker	STS (sequence-tagged-site)	TG222, SGN	TG222	58.8											PGSC0003DMG400037321	Soltu.DM03G019360	44081483..44082551	48719771..48719367	54948621..54948104	Solyc03g098090
3	CT90		S. lycopersicum	19,32	Tomato EST marker, South border of tomato IL3-2, on IL3-3	EST (expressed sequence tag)	CT90, SGN	CT90A	58.8											PGSC0003DMG400033684	Soltu.DM03G019560	44283699..44283375	48462641..48463171	54794244..54794576	Solyc03g097900
3*	solcap_snp_c2_53699		S. tuberosum	294	Potato SNP marker, associated with potato plant maturity	SNP (single nucleotide polymorphism)	Spud DB, http://solcap.msu.edu/potato													PGSC0003DMG400004338	Soltu.DM03G020000	44787715..44787619	48017173..48017152	54540375..54540475	Solyc03g097640
3	TG288		S. lycopersicum	19,242	Tomato STS marker, on tomato IL3-2 and IL3-3,	STS (sequence-tagged-site)	TG288, SGN	TG288	57,8											PGSC0003DMG400031737	Soltu.DM03G020130	45031947..45030817	47751228..47752358	54441268..54442385	Solyc03g097530
3	solcap_snp_c2_29678		S. tuberosum	294	Potato SNP marker, associated with potato plant maturity	SNP (single nucleotide polymorphism)	Spud DB, http://solcap.msu.edu/potato													PGSC0003DMG400026480	Soltu.DM03G020280	45229170..45229270	47553794..47553815	54303250..54303150	Solyc03g097400
3	AN11		Petunia x hybrida	194	Petunia WD repeat protein	Gene	U94748, NCBI													PGSC0003DMG400000561(a), PGSC0003DMG400026477(b)	Soltu.DM03G021460(a), Soltu.DM03G020340(b)	46361574..46362331(a), 45320696..45319958(b)	47460646..47461384(a), 46423367..46422610(b)	54221597..54222627	Solyc03g097340
3	TG74		S. lycopersicum	6,7,8,19,52,55,191,185,218,227,308,414	Tomato STS marker, linked to tomato QTL for fruit soluble solids (Brix), proximal to tomato QTL MF3a for fruit mass, linked to potato locus Y (yellow flesh), flanking potato QRL for late blight	STS (sequence-tagged-site)	TG74, SGN	TG74	58	TG74	21.4	TG74	27	TG74	31	TG74	41	TG74	44	PGSC0003DMG400026491	Soltu.DM03G020350(a), Soltu.DM03G020370(b)	45322908..45323350(a), 45327890..45328236(b)	47458900..45323350(a), 45327890..45328236(b)	54217208..54215396	Solyc03g097320
3	STG0018		S. tuberosum	218	Potato microsatellite marker in potato EST	SSR (simple sequence repeat)	BI920777, NCBI					STG0018	23							PGSC0003DMG400026490	Soltu.DM03G020390	45350373..45350493	47430826..47425414	54205205..54205225	Solyc03g097300
3*	GP80		S. tuberosum	1,6,7,8	Potato STS marker	STS (sequence-tagged-site)	CG783258, NCBI											GP80	43	PGSC0003DMG400026488	Soltu.DM03G020470	45449203..45447495	47324200..47329900	54125373..54126910	Solyc03g097250
3	SSR111		S. lycopersicum	407	Tomato microsatellite marker, linked with tomato QTL for fruit weight (fw3.1)	SSR (simple sequence repeat)	Ref. 407													PGSC0003DMG400003163	Soltu.DM03G020550	45514188..45514339	47270601..47270450	54084010..54083851	Solyc03g097190
3*	solcap_snp_c2_57865		S. tuberosum	294	Potato SNP marker, associated with potato plant maturity	SNP (single nucleotide polymorphism)	Spud DB, http://solcap.msu.edu/potato													PGSC0003DMG400000561	Soltu.DM03G021460	46361545..46361645	46423336..46423357	46681471..46682849(a), 54221860..54221957(b)	Solyc03g081210(a), Solyc03g097340(b)
3	cTOF9P13		S. lycopersicum	408	Tomato EST marker, flanking tomato QTL ssc3.1 for fruit soluble solids (Brix)	EST (expressed sequence tag)	BG125749, NCBI													PGSC0003DMG400003213	Soltu.DM03G021780	46632752..46634443	46157196..46155505	46995273..46996741	Solyc03g082500
3	SssI		S. tuberosum	2,112,196,235,322	Soluble starch synthase I, chloroplastic/amyloplastic (EC2.4.1.21), starch metabolism, functional candidate gene for potato tuber starch and reducing sugar content QTL, associated with tuber chip color, sucrose content, yield and tuber weight	Gene	Y10416, NCBI													PGSC0003DMG402018552	Soltu.DM03G022350	47133570..47124555	45887500..45896600	47499602..47488352	Solyc03g083090
3		pTY3.1	S. tuberosum	18,235,253,322	Potato QTL for tuber yield	QTL (quantitative trait locus)																31 - 48 Mbp	17 - 50 Mbp
3		pM3.1	S. tuberosum	219,294,322	Potato QTL for plant maturity	QTL (quantitative trait locus)																39 - 50 Mbp	40 - 50 Mbp
3		pTSC3.3 (Sug3b, L_early)	S. tuberosum	59,360	Potato QTL for tuber sugar content and chip color	QTL (quantitative trait locus)																43 - 49 Mbp	50 - ~ 44 Mbp
3	TG102		S. lycopersicum	6,7,8,19	Tomato STS marker	STS (sequence-tagged-site)	TG102, SGN	TG102	63									TG102	27	not annotated	Soltu.DM03G022430	47234674..47235392	45499130..45499210	47677039..47677765	Solyc03g083240
3	CT8		S. lycopersicum	19	Tomato EST marker	EST (expressed sequence tag)	CT8, SGN	CT8	55,8											PGSC0003DMG400009129	Soltu.DM03G022450	47256833..47252889	45477306..45481250	47700962..47697039	Solyc03g083270
3	3_45458723		S. tuberosum	50	Potato SNP marker, associated with potato resistance to late blight	SNP (single nucleotide polymorphism)	Ref. 50													# PGSC0003DMG400009082	# Soltu.DM03G022490	47279394..47271104	45458723	47720414..47712337	# Solyc03g083310
3	3_45458753		S. tuberosum	50	Potato SNP marker, associated with potato resistance to late blight	SNP (single nucleotide polymorphism)	Ref. 50													# PGSC0003DMG400009082	# Soltu.DM03G022490	47279394..47271104	45458753	47720414..47712337	# Solyc03g083310
3	3_45458754		S. tuberosum	50	Potato SNP marker, associated with potato resistance to late blight	SNP (single nucleotide polymorphism)	Ref. 50													# PGSC0003DMG400009082	# Soltu.DM03G022490	47279394..47271104	45458754	47720414..47712337	# Solyc03g083310
3*	solcap_snp_c2_55284		S. tuberosum	346	Potato SNP marker, linked with potato QRL for late blight (rAUDPC)	SNP (single nucleotide polymorphism)	Spud DB, http://solcap.msu.edu/potato													PGSC0003DMG400009081	Soltu.DM03G022550	47345205..47345105	45388812..45388833	47768618..47768518	Solyc03g083360
3*	GP25		S. tuberosum	1,3,6,7,8,9,13,14,16,17,52,75,181	Potato STS marker, linked to potato late blight QRL (MCR)	STS (sequence-tagged-site)	AJ492249 & AJ492250, NCBI									GP25	37	GP25	34	PGSC0003DMG400009077, PGSC0003DMG400009112	Soltu.DM03G022710 & Soltu.DM03G022720	47596864..47597600	45121625..45121008	01827000..1827146	Solyc03g007240
3	Solyc03g007310		S. lycopersicum	337	Tomato candidate gene (Abscisic acid receptor PYL8) for tomato QTL for fruit weight (tFW3.1), associated with tomato fruit weight	Gene	Solyc03g007310, SGN													PGSC0003DMG400009108	Soltu.DM03G022780	47692223..47694928	45026047..45023342	01904203..1907370	Solyc03g007310
3	P1f3		S. tuberosum	52	Potato EST marker (Ubiquitin conjugating enzyme, EC6.3.2.19)	EST (expressed sequence tag)	AJ487403, NCBI									P1f3-c	14			PGSC0003DMG400009069	Soltu.DM03G022710 & Soltu.DM03G022950	47889943..47886014	44828580..44824640	02075563..2071692	Solyc03g007470
3	CT171		S. lycopersicum	19	Tomato EST marker	EST (expressed sequence tag)	CT171, SGN	CT171	43.6											PGSC0003DMG400019963	Soltu.DM03G023190	48177411..48177863	44513027..44512575	02309944..2309492	Solyc03g007760
3		pLBR3.3 (Pin3B, qrAUDPC3.2)	S. tuberosum, S. berthaultii	3,9,14,17,50,57,58,75,181,240,294,346	Potato QTL for maturity corrected resistance to late blight (MCR)	QRL (quantitative resistance locus)																47 - 49 Mbp	45 - 50 Mbp
3	smp24		S. tuberosum	294,341,385	24 kDa seed maturation protein, in potato differential expression between quantitative late blight resistant and susceptible genotype pools, expression up regulated upon infection with P. infestans. functional candidate gene for late blight QRL, associated with potato resistance to late blight (MCR, rAUDPC) and plant maturity	Gene	Spud DB													PGSC0003DMG400019959	Soltu.DM03G023210	48191205..48188553	44499150..44501800	02297763..2300286	Solyc03g007740
3	StSGT1-1		S. tuberosum	165,345	Potato homolog of the Arabidopsis SGT1b gene functional in pathogen defense, functional candidate gene for potato late blight QRL, associated with potato QTL for plant maturity	Gene	AY615272, NCBI													PGSC0003DMG400020884	Soltu.DM03G023300	48308017..48303028	44476850..44481830	02229248..2233908	Solyc03g007670
3	solcap_snp_c2_20347		S. tuberosum	294	Potato SNP marker, associated with potato plant maturity	SNP (single nucleotide polymorphism)	Spud DB, http://solcap.msu.edu/potato													no annotated	Soltu.DM03G023310	48312784..48312884	44336051..44336072	02224569..2224481	Solyc03g007660
3	solcap_snp_c2_17559		S. tuberosum	346	Potato SNP marker, linked with potato QRL for late blight (rAUDPC)	SNP (single nucleotide polymorphism)	Spud DB, http://solcap.msu.edu/potato													PGSC0003DMG400009497	Soltu.DM03G023400	48647607..48648575	44147944..44147965	02417938..2418733	Solyc03g007860
3	DMG400009508		S. tuberosum	253	Gene of unknown function, with differential SNP allele frequency between pairs of potato genotype pools with differential tuber yield, SNP causing amino acid change, candidate gene for potato tuber yield QTL	Gene	Spud DB, SGN													PGSC0003DMG400009508	Soltu.DM03G023430	48680659..48676657	44112800..44116830	02434327..2430291	Solyc03g007880
3*	solcap_snp_c2_17581		S. tuberosum	253	Potato SNP marker, differential SNP allele frequency between pairs of potato genotype pools with differential tuber yield	SNP (single nucleotide polymorphism)	Spud DB, http://solcap.msu.edu/potato													not annotated	Soltu.DM03G023450	48703091..48703191	44090343..44090364	02447407..2447507	Solyc03g007900
3		Ts3.1 (qSPA3)	S. tuberosum	346	Potato QTL for resistance to Tecia solanivora	QRL (quantitative resistance locus)																44 - 56 Mbp	48 - 57 Mbp
3	GP246		S. tuberosum	6,7,8	Potato STS marker	STS (sequence-tagged-site)	CG783179, NCBI											GP246-b	49.001			no matching position (chr01 & chr02)	no matching position (chr01 & chr02)	no matching position
3	StKI-B		S. tuberosum	57,58,240	Potato Kunitz-type enzyme inhibitors, homology group B, clustered gene family, associated with potato resistance to late blight, functional candidates for late blight QRL	Gene	AF492359, NCBI													PGSC0003DMG400009512(a), PGSC0003DMG400010128(b)	Soltu.DM03G023510	48774965..48774133(a), 48738601..48737768(b), 48811312..48810480(c)	49926578..49926038(a), 43945001..43945666(b)	55579594.. 55578932(a), 55572073..55571387(b)	# Solyc03g098790(a), Solyc03g098780(b)
3	StKI-A (P1e9)		S. tuberosum	57,58,240	Potato Kunitz-type enzyme inhibitors, homology group A, clustered gene family, associated with potato resistance to late blight, functional candidates for late blight QRL	Gene	AF490593, NCBI									P1e9	39.003			PGSC0003DMG400009511(a), PGSC0003DMG400009513(b)	Soltu.DM03G023500(a), Soltu.DM03G023520(b)	48755208..48754547(a), 48791565..48790904(b) et al.	49930060..49930850(a), 44035251..44036076(b)	55579596..55578935(a), 55572075..55571425(b) et al.	# Solyc03g098790(a), Solyc03g098780(b)
3		tBWR3.1 (qBWR-2)	S. lycopersicum, S, pimpinellifolium, S. melongena	99,387	Tomato and eggplant QTL for resistance to Ralstonia solanacearum (bacterial wilt)	QRL (quantitative resistance locus)																		~ 54 - 58 Mbp
3	STM1058		S. tuberosum	16,218	Potato microsatellite marker in potato proteinase inhibitor	SSR (simple sequence repeat)	Z13992, NCBI					STM1058	20							# PGSC0003DMG400004547	Soltu.DM03G023550	48852410..48854215 et al.	50056100..50056950	55588906..55589944 et al.	# Solyc03g098795
3	STM1025		S. tuberosum	16,218	Potato microsatellite marker in potato proteinase inhibitor	SSR (simple sequence repeat)	X04118, NCBI					STM1025a	22							# PGSC0003DMG400004547	# Soltu.DM03G023580(a), Soltu.DM03G023620(b)	48900303..48900527(a), 48946831..48947036(b)	50056100..50056950	55589296..55589277	# Solyc03g098795
3	STM1020		S. tuberosum	16,218	Potato microsatellite marker in potato proteinase inhibitor	SSR (simple sequence repeat)	M15186, NCBI					STM1020a	29							# PGSC0003DMG400004547	# Soltu.DM03G023580	48900305..48900527	50056100..50056950	55589295..55589277	# Solyc03g098795
3	TG515		S. lycopersicum	19,99	Tomato EST marker, linked with tomato QTL for resistance to Ralstonia solanacearum (bacterial wilt)	EST (expressed sequence tag)	TG515, SGN	TG515	61,1											PGSC0003DMG400004548(a), PGSC0003DMG400015289(b)	Soltu.DM03G023640(a), Soltu.DM03G023680(a)	48989676..48989215(a), 49025287..49024826(b)	50031459..50030998(a), 50144168..50143707(b)	55627967..55629974	Solyc03g020070
3	STM1093		S. tuberosum	16	Potato microsatellite marker in potato proteinase inhibitor	SSR (simple sequence repeat)	Z12824, NCBI													PGSC0003DMG400004549	Soltu.DM03G023600	48923433..48924560	50033590..50034130	55638808..55639894	Solyc03g020050
3*	C2_At4g17300		A. thaliana	291	Tomato COS marker, ortholog of Arabidopsis gene At4g17300, flanking tomato QRL Ty-4	COS2 (conserved orthologous sequence)	At4g17300, TAIR													PGSC0003DMG400015215	Soltu.DM03G023850	49172915..49165305	50289118..50285745	55746417..55739210	Solyc03g019940
3	TG129		S. lycopersicum	19,31,32,191,310,321	Tomato STS marker, on tomato IL3-3, North of IL3-4, South of IL3-2, flanking tomato QTL for soluble solids (Brix), flanking potato Y locus	STS (sequence-tagged-site)	TG129, SGN	TG129	61,1	TG129	26,6									PGSC0003DMG400015211	Soltu.DM03G023900	49195037..49196828	50315024..50316815	55766716..55768637	Solyc03g019890
3	solcap_snp_c2_1556		S. tuberosum	360	Potato SNP marker, linked to potato QTL for tuber reducing sugar content and chip color (L_early)	SNP (single nucleotide polymorphism)	Spud DB, http://solcap.msu.edu/potato													not annotated	Soltu.DM03G024270	49454703..49454603	50573529..50573429	56016647..56016547	Solyc03g110880
3	StI050		S. tuberosum	185	Potato microsatellite marker in potato proteinase inhibitor	SSR (simple sequence repeat)	Ref. 185							StI050	27					not annotated	Soltu.DM03G024290	49482829..49482683	50599800..50602250	56044958..56044978	Solyc03g110900
3		Ty-4	S. chilense	291	Tomato gene for resistance to Tomato Yellow Leaf Curl Virus (TYLCV)	R gene																		55,7 - 56,2 Mbp
3	solcap_snp_c2_1533		S. tuberosum	294	Potato SNP marker, associated with potato plant maturity	SNP (single nucleotide polymorphism)	Spud DB, http://solcap.msu.edu/potato													PGSC0003DMG400015253	Soltu.DM03G024400	49568106..49568203	50688258..50688279	56118295..56118395	Solyc03g111010
3	SEX4		S. tuberosum	235	Phosphoglucan phosphatase, carbohydrate metabolism, functional candidate gene for tuber starch and reducing sugar content QTL	Gene	DQ241838, NCBI													PGSC0003DMG400015246	Soltu.DM03G024560	49749967..49759447	50875700..50885600	56219621..56227523	Solyc03g111160
3	C2_At5g60160		A. thaliana	291	Tomato COS marker, ortholog of Arabidopsis gene At5g60160, flanking tomato QRL Ty-4	COS2 (conserved orthologous sequence)	At5g60160, TAIR													PGSC0003DMG400015189	Soltu.DM03G024580	49776212..49767678	50898736..50894700	56244450 ..56237928	Solyc03g111180
3	At2D02 (AT5G63400)		A. thaliana	52	Arabidopsis EST marker (Adenylate kinase B)	EST (expressed sequence tag)	R65435, NCBI; AT5G63400, TAIR									At2D2	39.001			PGSC0003DMG400015187	Soltu.DM03G024600	49784128..49781082	50909920..50905860	56250027..56249348	Solyc03g111200
3	St_At1g05350		S. tuberosum	212	Potato ortholog to Sl_At1g05350 (thiF family protein)	COS2 (conserved orthologous sequence)	At1g05350, TAIR									St_At1g05350	40			PGSC0003DMG401015240	Soltu.DM03G024720	49921204..49925820	51050200..51058200	56357023..56361083	Solyc03g111340
3	TG599		S. lycopersicum	19,32	Tomato STS marker, North border of tomato IL3-4, on IL3-3	STS (sequence-tagged-site)	TG599, SGN	TG599	64,4											PGSC0003DMG401015233	Soltu.DM03G024970	50132149..50132245	51264413..51264509	56575861..56575957	Solyc03g111570
3*	RLPK		S. tuberosum	293	Receptor-like protein kinase, in potato differential expression between quantitative resistant and susceptible genotype pools, functional candidate gene for late blight QRL	Gene	Spud DB													PGSC0003DMG400015157	Soltu.DM03G025180	50396796..50394536	51533590..51535860	56837053..56834780	Solyc03g111800
3	S073624		S. lycopersicum	342	Tomato KASP marker, linked with tomato QRL for late blight	STS (sequence-tagged-site)	Ref. 342															no matching position	no matching position	57301410..57301510	intergenic
3	GP517		S. tuberosum	13,52	Potato STS marker	STS (sequence-tagged-site)	AJ487370, NCBI									GP517	47			PGSC0003DMG400018175	Soltu.DM03G026170 & Soltu.DM03G026180	51148078..51148894	52400100..52405700	57333437..57333844	Solyc03g112510 & Solyc03g112520
3	TG246		S. lycopersicum	19,149,210,242,308,313,321	Tomato STS marker, on tomato IL3-3 and IL3-4, linked with tomato late blight QRL, QTL for soluble solids (Brix) and fruit weight, proximal to tomato QTL for fruit total yield	STS (sequence-tagged-site)	TG246, SGN	TG246	68,8													no matching position	no matching position	57418708..57416880	intergenic
3	solcap_snp_c2_13987		S. tuberosum	253	Potato SNP marker, differential SNP allele frequency between pairs of potato genotype pools with differential tuber yield content	SNP (single nucleotide polymorphism)	Spud DB, http://solcap.msu.edu/potato													PGSC0003DMG400018104	Soltu.DM03G026260	51225182..51225082	52483900..52483921	57404108..57404024	Solyc03g112590
3	S073679		S. lycopersicum	342	Tomato KASP marker, linked with tomato QRL for late blight	STS (sequence-tagged-site)	Ref. 342													PGSC0003DMG402018164	Soltu.DM03G026350	51300081..51300181	52558907..52558932	57462432..57462532	Solyc03g112660
3	TG251		S. lycopersicum	19,312,314	Tomato STS marker, linked to tomato QTL for fruit weight and total yield	STS (sequence-tagged-site)	TG251, SGN	TG251	69.6											PGSC0003DMG400018102	Soltu.DM03G026390	51326213..51325275	52584986..52584048	57489822..57488954	Solyc03g112700
3	S2f10		S. tuberosum	52	Potato EST marker (Transcription factor like)	EST (expressed sequence tag)	AJ489141, NCBI									S2f10	49			PGSC0003DMG400018099	Soltu.DM03G026460	51357763..51359784	52623072..52616469	no matching position(chr02)
3	TG457		S. lycopersicum	19,242	Tomato STS marker, on tomato IL3-3 and IL3-4	STS (sequence-tagged-site)	TG457, SGN	TG457	70.7											intergenic	intergenic	51567833..51568167	52829302..52829636	57645470..57645682	intergenic
3	STG0022		S. tuberosum	218	Potato microsatellite marker in potato EST	SSR (simple sequence repeat)	BI406264, NCBI					STG0022	39							PGSC0003DMG400018088	Soltu.DM03G026880	51681479..51677660	52944035..52941782	57743705..57740018	Solyc03g113010
3	DMG400018086		S. tuberosum	253	Ubiquitin-protein ligase, gene with differential SNP allele frequency between pairs of potato genotype pools with differential tuber yield, SNPs causing amino acid changes, candidate gene for potato tuber yield QTL	Gene	Spud DB, SGN													PGSC0003DMG400018086	Soltu.DM03G026900	51699569..51698370	52961160..52962360	59565146..59563947(a), 57548227..57549358(b)	Solyc03g115420(a), Solyc03g112780
3	GP226		S. tuberosum	6,7,8,14	Potato STS marker, linked to Potato late blight QRL	STS (sequence-tagged-site)	CG783163, NCBI											GP226	62.002	PGSC0003DMG400025345	Soltu.DM03G027140	51857385..51857903	53171880..53173400	57871312..57871509	Solyc03g113240
3	SSR22		S. lycopersicum	264	Tomato microsatellite marker, linked with tomato QTL TSS3.1 for total soluble solids (Brix)	SSR (simple sequence repeat)	SSR22, SGN													PGSC0003DMG400025342	Soltu.DM03G027170	51887676..51887659	53203413..53203396	57884875..57885065	Solyc03g113270
3	solcap_snp_c2_57258		S. tuberosum	294,346	Potato SNP marker, associated with potato resistance to late blight (rAUDPC), linked with potato QTL for resistance to Tecia solanivora		Spud DB, http://solcap.msu.edu/potato													PGSC0003DMG400013183	Soltu.DM03G027300	52006975..52007075	53434196..53434217	57967400..57967497	Solyc03g113390
3*	PHA1		S. tuberosum	2,7,8,13,52,253	Proton ATPase 1 (EC 3.6.1.34), membrane transport, functional candidate gene for tuber quality QTL, differential SNP allele frequency between pairs of potato genotype pools with differential tuber yield	Gene	X76536, NCBI									PHA1-a	50			PGSC0003DMG400025328	Soltu.DM03G027310	52041502..52047584	53276700..53283700	57982931..57989018	Solyc03g113400
3	GP276		S. tuberosum	7,8,9,17	Potato STS marker, linked to potato late blight QRL	STS (sequence-tagged-site)	CG783210, NCBI											GP276	62.001	PGSC0003DMG400025331	Soltu.DM03G027380	52095257..52094507	53227060..53228850	58029235..58028581	Solyc03g113460
3	TG364		S. lycopersicum	19	Tomato STS marker	STS (sequence-tagged-site)	TG364, SGN			TG364B	39.1									PGSC0003DMG400024582	Soltu.DM03G027730	52354505..52355671	53763541..53764707	58272876..58274092	Solyc03g113800
3	St_At3g47990		S. tuberosum	212	Potato ortholog to Sl_At3g47990 (zinc finger (C3HC4-type RING finger) family protein)	COS2 (conserved orthologous sequence)	At3g47990, TAIR									St_At3g47990	52			# PGSC0003DMG400024497	# Soltu.DM03G028260	52905265..52911117	54304100..54311000	58720100..58725783	# Solyc03g114280
3	TG42		S. lycopersicum	19,149,185,218,308,314,324,414	Tomato STS marker, linked with tomato late blight QRL, tomato QTL for fruit weight and total yield, flanking tomato QTL for fruit soluble solids (Brix), distal to tomato QTL MF3a for fruit mass and QTL SS3a for soluble solids, proximal to tomato QTL MF3b for fruit mass	STS (sequence-tagged-site)	TG42, SGN	TG42	77,6	TG42	26,6	TG42	42	TG42	59					# PGSC0003DMG400024497	# Soltu.DM03G028260	52910567..52911118	54304100..54311000	58725234..58725784	# Solyc03g114280
3	TG442		S. lycopersicum	19,32,92	Tomato STS marker, flanking tomato R gene Asc	STS (sequence-tagged-site)	TG442, SGN	TG442	80											intergenic	intergenic	53016070..53015979	54420353..54420262	58794325..58794158	intergenic
3	X03_58439037		S. lycopersicum	377	Tomato SNP marker, associated with tomato QTL for fruit weight	SNP (single nucleotide polymorphism)	Ref. 377													PGSC0003DMG400024505	Soltu.DM03G028400	53060972..53060948	54475972..54475948	58808413..58808389	Solyc03g114380
3	STM5112		S. lycopersicum	218	Potato microsatellite marker	SSR (simple sequence repeat)	Ref. 218					STM5112	46							# PGSC0003DMG400024508	# Soltu.DM03G028480	53120748..53121549	54537185..54538007	58870008..58870809	# Solyc03g114450
3	T1130		S. lycopersicum	407	Tomato EST marker, flanking tomato QTL fw3.2 for fruit weight	EST (expressed sequence tag)	TFBBD17TH, SGN													# PGSC0003DMG400024508	# Soltu.DM03G028480	53120710..53121677	54537147..54538111	58869970..58870937	# Solyc03g114450
3	St_At5g23060		S. tuberosum	212	Potato ortholog to Sl_At5g23060 (gene similar to extracellular Ca2+ sensing receptor)	COS2 (conserved orthologous sequence)	At5g23060, TAIR									St_At5g23060	53			# PGSC0003DMG400024508	# Soltu.DM03G028480	53120628..53123963	54537070..54540400	58869916..58873447	# Solyc03g114450
3	solcap_snp_c1_7111		S. tuberosum	294	Potato SNP marker, associated with potato plant maturity	SNP (single nucleotide polymorphism)	Spud DB, http://solcap.msu.edu/potato													PGSC0003DMG401024510	Soltu.DM03G028540	53165814..53165914	54582037..54582058	58908085..58908185	Solyc03g114500
3	X03_58754293		S. lycopersicum	377	Tomato SNP marker, flanking tomato QTL for fruit weight (tFW3.3)	SNP (single nucleotide polymorphism)	Ref. 377													PGSC0003DMG400024625	Soltu.DM03G028960	53467127..53459724	54886742..54879341	59122860..59122900	Solyc03g114830
3	CT85		S. lycopersicum	19,310,313,319,393,408,409	Tomato EST marker, flanking (linked to) tomato QTL for soluble solids (Brix), proximal to tomato QTL for fruit weight (mass)	EST (expressed sequence tag)	CT85, SGN	CT85	83													no matching position (chr01)	no matching position (chr01)	no matching position (chr01)
3		tM3.3 (mat3.1)	S. lycopersicum, S. habrochaites (L. hirsutum)	312	Tomato QTL for maturity	QTL (quantitative trait locus)																		~ 50 - 60 Mbp
3		tSS3.4 (ssc3.2, brx3.1, ssc3a, sugs3.1, sugs3.2, brx-3CD, ssc3.1, SS3a)	S. lycopersicum, S. pimpinellifolium, S. cheesmanii, S. pennellii	197,242,308,310,313,321,408,414	Tomato QTL for fruit soluble solids (Brix)	QTL (quantitative trait locus)																		54 - 59 Mbp
3		tFW3.5 (MF3a)	S. lycopersicum, S. cheesmanii	414	Potato QTL for fruit weight (mass)	QTL (quantitative trait locus)																		54 - 58 Mbp
3		tFY3.2 (ydt3.1, yld3.2)	S. lycopersicum, S. habrochaites (L. hirsutum), S. parviflorum, S. pennellii, S. pimpinellifolium	242,310,312,314,324,405	Tomato QTL for fruit total yield	QTL (quantitative trait locus)																		57 - 61 Mbp
3		tFW3.3 (FW3ab, fw-3FG, fw3.1, fw3.2, MF3b)	S. lycopersicum, S. lycopersicumvar. cerasiforme, S. cheesmanii, S. pimpinellifolium, S. pennellii, S. parviflorum, S. habrochaites (L. hirsutum)	70,242,308,312,313,314,324,377,393,405,407,408,409,414	Tomato QTL for fruit weight	QTL (quantitative trait locus)																		59,1 - 59,3 Mbp
3	SlKLUH		S. lycopersicum	406	Tomato gene underlying tomato QTL fw3.2 for fruit weight	Gene	At1G13710, TAIR													PGSC0003DMG400024630	Soltu.DM03G029090	53574285..53572438	54994462..54992615	59219620..59217686	Solyc03g114940
3		pLBR3.4 (Pin3C, qrAUDPC3.1)	S. tuberosum	9,14,17,293,294,346	Potato QTL for maturity corrected resistance to late blight (MCR)	QRL (quantitative resistance locus)																52 - 60,5 Mbp	53 - 62 Mbp
3		tLBR3.2 (LbR3-3, lb3)	S. lycopersicum, S. hirsutum	149,342	Tomato QTL for resistance to late blight	QRL (quantitative resistance locus)																		56 - 59 Mbp
3	Asc		S. pennellii	10,13,32,92,93	Tomato gene for resistance to Alternaria alternata, Asc belongs to the longevity assurance gene (LAG) family, has 6 TM domains and a LAG1 domain	R gene	AF198177, NCBI													PGSC0003DMG400024613, PGSC0003DMG400024513	Soltu.DM03G028670	53243385..53241572	54656240..54659210	58963419..58960965	Solyc03g114600
3	X03_58846611		S. lycopersicum	377	Tomato SNP marker, flanking tomato QTL for fruit weight (tFW3.3)	SNP (single nucleotide polymorphism)	Ref. 377													intergenic	intergenic	53569105..53569134	54989282..54989311	59214546..59214583	intergenic
3	TG134B3		S. lycopersicum	407	Tomato CAPS marker, flanking tomato QTL fw3.2 for fruit weight															intergenic	intergenic	53671581..53671603	55098810..55098832	59291831..59291527	intergenic
3	TG134		S. lycopersicum	6,7,8,19,32,92,185,218,242,405	Tomato STS marker, on tomato IL3-3 and IL3-4, flanking tomato R gene Asc, linked to tomato QTL for fruit weight, number and total weight (yield)	STS (sequence-tagged-site)	TG134, SGN	TG134	83	TG134	40.5	TG134	35	TG134	47			TG134	67.001	intergenic	intergenic	53720612..53718279	55148465..55147897	59335618..59333678	intergenic
3	solcap_snp_c2_18272		S. tuberosum	253	Potato SNP marker, differential SNP allele frequency between pairs of potato genotype pools with differential tuber yield	SNP (single nucleotide polymorphism)	Spud DB, http://solcap.msu.edu/potato													PGSC0003DMG400024643	Soltu.DM03G029340	53804799..53804699	55234788..55234809	59427600..59427500	Solyc03g115220
3	S074168		S. lycopersicum	342	Tomato KASP marker linked with tomato QRL for late blight	STS (sequence-tagged-site)	Ref. 342													not annotated	Soltu.DM03G029360	53834244..53834346	55264293..55264323	59451278..59451377	Solyc03g115240
3	solcap_snp_sl_34196		S. lycopersicum	70	Tomato SNP marker, associated with tomato fruit weight	SNP (single nucleotide polymorphism)	sl_34196, SGN													not annotated	Soltu.DM03G029370	53860027..53859928	55291154..55291055	59472763..59472663	Solyc03g115250
3	P7g11		S. tuberosum	52	Potato EST marker (Ribosomal protein S19)	EST (expressed sequence tag)	AJ487440, NCBI									P7g11	58.001			PGSC0003DMG400024546	Soltu.DM03G029460	53910741..53912898	55344890..55342960	59514262..59516431	Solyc03g115360
3	S1a10		S. tuberosum	52	Potato EST marker (Translation initiation factor EIF-5A)	EST (expressed sequence tag)	AJ489099, NCBI									S1a10-a	58.003			PGSC0003DMG400024558	Soltu.DM03G029770	54139528..54141001	55575040..55577310	59710452..59712660	Solyc03g115650
3*	TG359		S. lycopersicum	19,321,324	Tomato STS marker, proximal to tomato QTL for fruit soluble solids (Brix) and total sugar content, distal to tomato QTL for fruit total yield and weight	STS (sequence-tagged-site)	TG359, SGN	TG359	87.9											# PGSC0003DMG400024561	# Soltu.DM03G029830	54206780..54206161	55644100..55643481	59765913..59765382	# Solyc03g115700
3	P7g3		S. tuberosum	52,55	Potato EST marker (Ser/Thr-spec. protein kinase, PKIN1, EC2.7.1.-)	EST (expressed sequence tag)	AJ487441, NCBI									P7g3-a	58.002			# PGSC0003DMG400024561	# Soltu.DM03G029830	54208294..54207394	55645770..55641070	59767404..59766525	# Solyc03g115700
3	GP256		S. tuberosum	7,8	Potato STS marker (putative receptor-like protein kinase)	STS (sequence-tagged-site)	CG783189, NCBI											GP256	67.002	PGSC0003DMG400024665 & PGSC0003DMG400024561	Soltu.DM03G029840	54209255..54208360	55646575..55645680	59768378..59767472	Solyc03g115710
3	PPE		S. tuberosum	2	Pentose-5-phosphate 3-epimerase (EC5.1.3.1), Calvin cyle, photorespiration, functional candidate gene for tuber quality QTL	Gene	Z50098, NCBI													PGSC0003DMG400019521	Soltu.DM03G029950	54319100..54312735	55781665..55775759	59839188..59832589	Solyc03g115820
3	TG431		S. lycopersicum	19	Tomato STS marker	STS (sequence-tagged-site)	TG431, SGN	TG431	92,3											# PGSC0003DMG400019513 & PGSC0003DMG400019514	# Soltu.DM03G030240 & Soltu.DM03G030250	54557909..54556189	56023767..56022047	60062886..60060357	# Solyc03g116150
3	TG242		S. lycopersicum	19,32,313,407	Tomato STS marker, South border of tomato IL3-3, on IL3-4, linked to tomato QTL for soluble solids (Brix) and fruit weight, flanking tomato QTL fw3.2 for fruit weight	STS (sequence-tagged-site)	TG242, SGN	TG242	92,3	TG242	42.4									# PGSC0003DMG400019513	# Soltu.DM03G030240 & Soltu.DM03G030250	54557909..54556274	56023767..56022132	60062886..60060403	# Solyc03g116150
3	TG417		S. lycopersicum	19,312	Tomato STS marker, flanking tomato QTL for soluble solids (Brix) and fruit total yield	STS (sequence-tagged-site)	TG417, SGN	TG417	92.3											PGSC0003DMG404000594(a), PGSC0003DMG400000593(b)	Soltu.DM03G030400	54879385..54879441	56331457..56334114(a), 56324121..56324176(b	60224883..60225164	not annotated
3	St_At1g74520		S. tuberosum	212	Potato ortholog of Sl_At1g74520 (AtHVA22a family. Protein expression is ABA- and stress-inducible).	COS2 (conserved orthologous sequence)	At1g74520, TAIR									St_At1g74520	57.001			PGSC0003DMG400000600	Soltu.DM03G030440	54932068..54933775	56388030..56390840	60283189..60285049	Solyc03g116350
3	St_At1g52590		S. tuberosum	212	Potato ortholog of Sl_At1g52590 (gene similar to RNase H domain-containing protein)	COS2 (conserved orthologous sequence)	At1g52590, TAIR									St_At1g52590	57.002			PGSC0003DMG400000613	Soltu.DM03G030640	55041922..55043800	56499170..56501950	60388516..60388629	Solyc03g116570
3	DMG400000619		S. tuberosum	253	Nucleosome-binding protein, gene with differential SNP allele frequency between pairs of potato genotype pools with differential tuber yield, candidate gene for potato tuber yield QTL	Gene	Spud DB, SGN													PGSC0003DMG400000619	Soltu.DM03G030740	55112507..55114868	56571860..56574220	60440802..60443608	Solyc03g116680
3	DMG400000639		S. tuberosum	253	Delta-9 desaturase, gene with differential SNP allele frequency between pairs of potato genotype pools with differential tuber yield, candidate gene for potato tuber yield QTL	Gene	Spud DB, SGN													PGSC0003DMG400000639	Soltu.DM03G030790	55144941..55142028	56602120..56605040	60473831..60471030	Solyc03g116730
3	solcap_snp_c2_26382		S. tuberosum	346	Potato SNP marker, linked with potato QTL for resistance to Tecia solanivora	SNP (single nucleotide polymorphism)	Spud DB, http://solcap.msu.edu/potato													expressed, not annotated	Soltu.DM03G030860	55200716..55200816	56661746..56661767	60523664..60523764	Solyc03g116790
3	S2g5		S. tuberosum	52	Potato EST marker (Signal recognition particle 54 kD, SRP54)	EST (expressed sequence tag)	AJ489145, NCBI									S2g5	59			PGSC0003DMG400000625	Soltu.DM03G030880	55208125..55211333	56666700..56672600	60530883..60535893	Solyc03g116810
3	STM5115		S. tuberosum	218	Potato microsatellite marker	SSR (simple sequence repeat)	Ref. 218					STM5115	55							PGSC0003DMG400014144	Soltu.DM03G031710	55788932..55788912	57309795..57309775	61088694..61088674	Solyc03g117490
3	DMG400014209		S. tuberosum	253	Pentatricopeptide repeat-containing protein, gene with differential SNP allele frequency between pairs of potato genotype pools with differential tuber yield, SNPs causing amino acid changes, candidate gene for potato tuber yield QTL	Gene	Spud DB, SGN													PGSC0003DMG400014209	Soltu.DM03G031790 & Soltu.DM03G031800	55854559..55853523	57374630..57378590	61148675..61145540	Solyc03g117570
3	DNAJ8		S. tuberosum	294,385	Heat shock protein binding protein, in potato differential expression between quantitative late blight resistant and susceptible genotype pools, functional candidate gene for late blight QRL, associated with potato resistance to late blight (MCR, rAUDPC) and plant maturity	Gene	Spud DB, SGN													PGSC0003DMG400014210	Soltu.DM03G031820	55863621..55862207	57386520..57385090	61154124..61152854	Solyc03g117590
3	solcap_snp_c1_108		S. tuberosum	294,360	Potato SNP marker, associated with potato QRL for late blight (MCR), flanking potato QTL L_early for tuber reducing sugar content and chip color	SNP (single nucleotide polymorphism)	Spud DB, http://solcap.msu.edu/potato													# PGSC0003DMG400014152	# Soltu.DM03G031830	55884292..55884192	57407185..57407206	61170669..61170569	# Solyc03g117600
3	solcap_snp_c2_397		S. tuberosum	346	Potato SNP marker, flanking potato QTL for resistance to Tecia solanivora	SNP (single nucleotide polymorphism)	Spud DB, http://solcap.msu.edu/potato													# PGSC0003DMG400014152	# Soltu.DM03G031830	55884384..55884484	57407377..57407398	61170761..61170861	# Solyc03g117600
3	St4cl		S. tuberosum	1,6,7,8,9,13,16,59,94,219,253,345	4-coumarate: CoA ligase, pathogenesis related, functional candidate gene for quantitative resistance to pathogens, linked to potato QTL for tuber sugar content (Sug3c), associated with potato plant maturity, differential SNP allele frequency between pairs of potato genotype pools with differential tuber yield	Gene	M62755, NCBI									St4cl-a	63.001	St4cl-a	69	PGSC0003DMG400014223	Soltu.DM03G032090	56044136..56040882	57566700..57569950	61335116..61331620	Solyc03g117870
3	St_At1g09760		S. tuberosum	212	Potato ortholog of Sl_At1g09760 (U2A', U2 small nuclear ribonucleoprotein A)	COS2 (conserved orthologous sequence)	At1g09760, TAIR									St_At1g09760	63.002			PGSC0003DMG400014166	Soltu.DM03G032170	56081403..56082139	57610100..57618800	61370486..61371216	Solyc03g117940
3	S1b3 (RBO)		S. tuberosum	52,345	Potato EST marker, encoding respiratory burst oxidase functional in pathogen defense, functional candidate gene for late blight QRL, associated with potato QTL for plant maturity	EST (expressed sequence tag)	AJ489105, NCBI									S1b3	62			PGSC0003DMG400014168	Soltu.DM03G032210	56138561..56140995	57670400..57664500	61426490..61428888	Solyc03g117980
3		tFY3.3 (ydt3.2)	S. lycopersicum, S. habrochaites (L. hirsutum)	312	Tomato QTL for fruit total yield	QTL (quantitative trait locus)																		60 - 65 Mbp
3		tFW3.4 (fw3.1, MF3b)	S. lycopersicum, S. pimpinellifolium, S. cheesmanii	70,337,377,408,414	Tomato QTL for fruit weight (mass)	QTL (quantitative trait locus)																		61,5 - 62,7 Mbp
3		pTY3.2	S. tuberosum	253	Potato QTL for tuber yield	QTL (quantitative trait locus)																51 - 57 Mbp	52 - 58 Mbp
3		pTSC3.4 (Sug3c, a_early)	S. tuberosum	59,360	Potato QTL for tuber sugar content (chip color)	QTL (quantitative trait locus)																55 - 59 Mbp	56 - 61 Mbp
3		tSS3.5 (ssc3.2, sugs3.2, brx3.1, sugs3.1, ssc3.1)	S. lycopersicum, S. habrochaites (L. hirsutum), S. lycopersicum v. cerasiforme, S. parviflorum	242,312,319,321,408	Tomato QTL for fruit soluble solids (Brix) and total sugar content	QTL (quantitative trait locus)																		60 - 63 Mbp
3		pM3.2	S. tuberosum	219,294	Potato QTL for plant maturity	QTL (quantitative trait locus)																53 - 57 Mbp	54 - 58 Mbp
3		tM3.4 (mat3.2)	S. lycopersicum, S. parviflorum	314	Tomato QTL for maturity	QTL (quantitative trait locus)																		61 - 64,7 Mbp
3	TG377		S. lycopersicum	19,32,242,314,321	Tomato STS marker, proximal to tomato IL3-5, on IL3-4, linked to tomato QTL for fruit total sugar content, proximal to tomato QTL for maturity, distal to tomato QTL for fruit yield	STS (sequence-tagged-site)	TG377, SGN	TG377	97											PGSC0003DMG400014171	Soltu.DM03G032370	56263019..56263953	57800524..57801458	61526389..61527104	not annotated
3	solcap_snp_c2_245		S. tuberosum	360	Potato SNP marker, linked with potato QTL for tuber reducing sugar content and chip color (a_early)	SNP (single nucleotide polymorphism)	Spud DB, http://solcap.msu.edu/potato													expressed, not annotated	Soltu.DM03G032460	56334740..56334640	57875558..57875458	61588600..61588500	Solyc03g118200
3	solcap_snp_c2_229		S. tuberosum	346	Potato SNP marker, linked with potato QRL for late blight (rAUDPC)	SNP (single nucleotide polymorphism)	Spud DB, http://solcap.msu.edu/potato													PGSC0003DMG400014179	Soltu.DM03G032540	56423098..56429355	57978601..57978622	61663932..61670916	Solyc03g118290
3	TG249		S. lycopersicum	19,149	Tomato STS marker, linked with tomato late blight QRL	STS (sequence-tagged-site)	TG249, SGN	TG249	98,4											# PGSC0003DMG400014180	# Soltu.DM03G032560	56444541..56445860	57998830..58000149	61684238..61685555	Solyc03g118320
3	TG311		S. lycopersicum	19	Tomato STS marker	STS (sequence-tagged-site)	TG311, SGN	TG311	98,4	TG311	49.6									# PGSC0003DMG400014180	# Soltu.DM03G032560	56446349..56445038	57998871..57999327	61686079..61684735	Solyc03g118330
3	CD4		S. lycopersicum	19,32,308	Tomato EST marker, North border of tomato IL3-5, on IL3-4, linked to tomato QTL for soluble solids (Brix)	EST (expressed sequence tag)	CD4, SGN	CD4A	98.4											PGSC0003DMG400014248	Soltu.DM03G032580	56449950..56450403	58004241..58004694	61693532..61693997	Solyc03g118340
3	TG126		S. lycopersicum	242	Tomato STS marker, on tomato IL3-4 and IL3-5, distal to tomato QTL for fruit yield	STS (sequence-tagged-site)	TG126, SGN													# PGSC0003DMG400014185	# Soltu.DM03G032700	56538958..56539392	58094658..58097613	61785111..61785554	# Solyc03g118480
3	Solyc03g118480		S. lycopersicum	337	Tomato candidate gene (Cell division cycle associated 7) for tomato QTL for fruit weight (tFW3.4), associated with tomato fruit weight	Gene	Solyc03g118480, SGN													# PGSC0003DMG400014185	# Soltu.DM03G032700	56538958..56539392	58094658..58097613	61785111..61785554	# Solyc03g118480
3	TG152		S. lycopersicum	19,242,319,393	Tomato STS marker, on tomato IL3-4 and IL3-5, proximal to tomato QTL for fruit sugar content, distal to tomato QTL for fruit weight (mass)	STS (sequence-tagged-site)	TG152, SGN	TG152	102.6											expressed, not annotated	Soltu.DM03G033020	56765022..56763600	58289035..58287613	61962487..61961061	Solyc03g118640
3	At2A02 (AT5G23860)		A. thaliana	52,55	Arabidopsis EST marker (beta-1,7,6,8,4,2/3 tubulin gene, TUB)	EST (expressed sequence tag)	T41808, NCBI; AT5G23860, TAIR									At2A2-a	68			PGSC0003DMG400005671	Soltu.DM03G033130	56852249..56850452	58378273..58376714	62034157..62033534	Solyc03g118760
3*	GP91		S. tuberosum	6,7,8,31,52,55,59	Potato STS marker (Spliceosome associated protein U2 snRNP), linked to potato QTL for tuber sugar content (Sug3c)	STS (sequence-tagged-site)	AJ487381, NCBI											GP91-d		# PGSC0003DMG400005746	# Soltu.DM03G033170	56885672..56886382	58410480..58414780	62066854..62067572	# Solyc03g118800
3	solcap_snp_sl_61634		S. lycopersicum	70	Tomato SNP marker, associated with tomato fruit weight	SNP (single nucleotide polymorphism)	sl_61634, SGN													# PGSC0003DMG400005746	# Soltu.DM03G033170	56886726..56886626	58414654..58414554	62067916..62067816	# Solyc03g118800
3	CT243		S. lycopersicum	19,32,308,312,321	Tomato EST marker, on tomato IL3-5, South border of IL3-4, linked to tomato QTL for fruit soluble solids (Brix) and total yield	EST (expressed sequence tag)	CT243, SGN	CT243	106,2											PGSC0003DMG400005745	Soltu.DM03G033180	56888960..56889217	58416888..58417145	62069967..62070230	Solyc03g118810
3	P1g11		S. tuberosum	52	Potato EST marker (G protein, beta subunit)	EST (expressed sequence tag)	AJ487405, NCBI									P1g11-b	70.001			PGSC0003DMG401005658	Soltu.DM03G033430	57085154..57084604	58609550..58607500	62203636..62203088	Solyc03g119040
3	S3a3		S. tuberosum	52	Potato EST marker (Ribosomal protein S7, RS7)	EST (expressed sequence tag)	AJ489151, NCBI									S3a3-a	70.002			PGSC0003DMG400005642	Soltu.DM03G033790	57348344..57347872	58878350..58876630	62440434..62439966	Solyc03g119360
3	X03_62140362		S. lycopersicum	377	Tomato SNP marker, flanking tomato QTL for fruit weight (tFW3.4)	SNP (single nucleotide polymorphism)	Ref. 377													PGSC0003DMG400005720	Soltu.DM03G033980	57469712..57469738	59001539..59001565	62534089..62534116	Solyc03g119490
3	X03_62287203		S. lycopersicum	377	Tomato SNP marker, flanking tomato QTL for fruit weight (tFW3.4)	SNP (single nucleotide polymorphism)	Ref. 377													PGSC0003DMG401005711(a), not annotated(b)	not annotated(a), Soltu.DM03G034240(b)	57612655..57612678(a), 57668799..57668776(b)	59149442..59149465(a), 59209997..59206323(b)	62680287..62680316	Solyc03g119670
3	CD71		S. lycopersicum	19,414	Tomato EST marker, distal to tomato QTL MF3b for fruit weight	EST (expressed sequence tag)	AA824686, NCBI	CD71	111	CD71	49.6											no sequence homology	no sequence homology	62754406..62754542	Solyc03g119760
3	X03_62529768		S. lycopersicum	377	Tomato SNP marker, associated with tomato QTL for fruit weight (tFW3.4)	SNP (single nucleotide polymorphism)	Ref. 377													PGSC0003DMG400005614		57917160..57917186	59456887..59456913	62922167..62922193	Solyc03g119950
3	At2B05 (AT1G04240)		A. thaliana	52,55	Arabidopsis EST marker (Auxin induced genes 8, 9, 14)	EST (expressed sequence tag)	T42378,U18406, NCBI; AT1G04240, TAIR									At2B5-e	72			PGSC0003DMG400002636(a), PGSC0003DMG400002635(b)	Soltu.DM03G000450(a), Soltu.DM03G035030(b)	00458985..458668(a), 58341839..58342555(b)	59909481..59909528(a), 59920077..59920130(b)	00222281..221964(a), 63322193..63321972(b)	not annotated(a), Solyc03g120500(b)
3	St_At1g80360		S. tuberosum	212	Potato ortholog to Sl_At1g80360 (aminotransferase class I and II family protein)	COS2 (conserved orthologous sequence)	At1g80360, TAIR									St_At1g80360	76			not annotated	Soltu.DM03G035070(a), Soltu.DM03G035080(b)	58375236..58374790(a), 58386512..58383747(b)	59952700..59962400	63281555..63276886	Solyc03g120450
3*	CT179		S. lycopersicum	19,321	Tomato EST marker, distal to tomato QTL for fruit soluble solids (Brix)	EST (expressed sequence tag)	CT179, SGN	CT179	113.4											PGSC0003DMG400002552	Soltu.DM03G035150	58411104..58411419	59991731..59992053	63301810..63302126	Solyc03g120470
3	SSR320		S. lycopersicum	210,408	Tomato microsatellite marker, flanking tomato QTL tFW3.4 for fruit weight and QTL tSS3.5 for fruit soluble solids (Brix)	SSR (simple sequence repeat)	SSR320, SGN													PGSC0003DMG400002615	Soltu.DM03G035660	58781490..58781628	60365606..60365744	63604127..63604278	Solyc03g120930
3	TG214		S. lycopersicum	19,242,310,314,319,393,408	Tomato STS marker, on tomato IL3-5, linked to tomato QTL for maturity and fruit sugar content, flanking tomato QTL ssc3.1 for fruit soluble solids (Brix)	STS (sequence-tagged-site)	TG214, SGN	TG214	116,5													no matching position (chr07)	no matching position (chr07)	no matching position (chr07)
3	HXK1 (P3c10)		S. tuberosum	2,52,197,235	Hexokinase (EC2.7.1.1) (potato EST marker P3c10), glycolysis, oxidative pentose phosphate pathway, functional candidate gene for potato tuber and tomato fruit quality QTL	Gene	AJ487426, X94302, NCBI									P3c10	78			PGSC0003DMG400002525	Soltu.DM03G035820	58941059..58935943	60527100..60521600	63745340..63740450	Solyc03g121070
3	GP295		S. tuberosum	4,16	Potato STS marker	STS (sequence-tagged-site)	CG783225, NCBI											GP295	90	not annotated	Soltu.DM03G036140	59194763..59194066	60784089..60784786	63958558..63957833	Solyc03g121410
3	CT115		S. lycopersicum	19	Tomanto EST marker	EST (expressed sequence tag)	CT115, SGN	CT115	118,9											PGSC0003DMG400002568	Soltu.DM03G036400	59413384..59413764	61009721..61010101	64151407..64151786	Solyc03g121620
3	StI060		S. tuberosum	185,218	Potato microsatellite marker in potato EST	SSR (simple sequence repeat)	Ref. 185							StI060	43					PGSC0003DMG400002495	Soltu.DM03G036460	59465524..59465505	61060340..61063300	64199160..64199141	Solyc03g121660
3	STI0061		S. tuberosum	218	Potato microsatellite marker in potato EST	SSR (simple sequence repeat)	Ref. 218					STI0061	75									no matching position (chr06)	no matching position (chr06)	no matching position (chr06)
3	INV-cw-3		S. tuberosum	235	Cell wall invertase (EC3.2.1.26), sugar metabolism, functional candidate gene for potato tuber reducing sugar content QTL	Gene	Spud DB													PGSC0003DMG400002583	Soltu.DM03G036480	59479893..59481406	61076910..61079810	64213620..64216237	Solyc03g121680
3	solcap_snp_sl_33819		S. lycopersicum	70	Tomato SNP marker, associated with tomato fruit weight	SNP (single nucleotide polymorphism)	sl_33819, SGN													PGSC0003DMG400002573	Soltu.DM03G036680	59614045..59613949	61212575..61212479	64350462..64350362	Solyc03g121880
3	STM0021		S. tuberosum	16	Potato microsatellite marker	SSR (simple sequence repeat)	Ref. 16													not annotated	Soltu.DM03G036760	59662361..59662464	61261628..61262304	no matching position
3	TG549		S. lycopersicum	19	Tomato STS marker	STS (sequence-tagged-site)	TG549, SGN	TG549	119.9											PGSC0003DMG400022891	Soltu.DM03G036910	59794055..59794534	61397800..61403800	64507897..64506603	Solyc03g122120
3	STG0010		S. tuberosum	218	Potato microsatellite marker in potato EST	SSR (simple sequence repeat)	BM407152, NCBI					STG0010	75							PGSC0003DMG400022897	Soltu.DM03G037050	59901798..59901935	61503450..61505400	64608927..64608908	Solyc03g122300
3*	LoxH3		S. tuberosum	294	13-lipoxygenase H3, functional in jasmonate pathway, in potato differential expression between quantitative late blight resistant and susceptible genotype pools, functional candidate gene for late blight QRL	Gene	X96406, NCBI													PGSC0003DMG400022894	Soltu.DM03G037120	59945575..59949968	61552120..61547720	64656017..64660295	Solyc03g122340
3	TG501		S. lycopersicum	19,314	Tomato STS marker, distal to tomato QTL for maturity	STS (sequence-tagged-site)	TG501, SGN	TG501	123.4											PGSC0003DMG400022893	Soltu.DM03G037130	59958766..59959282	61560943..61561459	64664782..64665300	Solyc03g122350
3	CT250		S. lycopersicum	19	Tomanto EST marker	EST (expressed sequence tag)	CT250, SGN	CT250	123.4											PGSC0003DMG400009144	Soltu.DM03G037130	60090818..60091928	61698804..61699914	64802278..64803362	Solyc03g123520
3	StI035		S. tuberosum	185	Potato microsatellite marker in potato EST	SSR (simple sequence repeat)	Ref. 185													PGSC0003DMG400009146	Soltu.DM03G037350	60125670..60125752	61735530..61732830	64830555..64830643	Solyc03g123560
3	solcap_snp_c2_37146		S. tuberosum	346	Potato SNP marker, linked with potato QRL for late blight (rAUDPC)	SNP (single nucleotide polymorphism)	Spud DB, http://solcap.msu.edu/potato													PGSC0003DMG400009147	Soltu.DM03G037360	60147662..60147762	61757448..61757469	64849201..64849301	Solyc03g123570
3	TG533		S. lycopersicum	19	Tomato STS marker	STS (sequence-tagged-site)	TG533, SGN	TG533	125,2											PGSC0003DMG400009148	Soltu.DM03G037380	60152798..60154411	61762544..61764157	64854628..64856212	Solyc03g123590
3	PME (S2a6)		S. tuberosum	52,293,341,385	Pectin methylesterase (EC3.1.1.11) (potato EST marker S2a6), expression in potato up regulated upon infection with P.infestans, functional candidate gene for late blight QRL, associated with potato QRL for late blight (MCR, rAUDPC)	Gene	AJ489134, NCBI									S2a6	84			PGSC0003DMG400009178	Soltu.DM03G037430	60186392..60184707	61797550..61793610	64883193..64881646	Solyc03g123630
3	STM1069		S. tuberosum	16	Potato microsatellite marker in potato EST	SSR (simple sequence repeat)	X78271, NCBI													PGSC0003DMG400009156	Soltu.DM03G037550	60263383..60263364	61871600..61880000	64962721..64963096	Solyc03g123760
3	St_At5g49830		S. tuberosum	212	Potato ortholog to Sl_At5g49830 (unknown protein)	COS2 (conserved orthologous sequence)	At5g49830, TAIR									St_At5g49830	85.003			PGSC0003DMG401009187	Soltu.DM03G037660	60352683..60348437	61964800..61973500	65018244..65014563	Solyc03g123870
3	S3a8		S. tuberosum	52	Potato EST marker (alpha 1,2 mannosidase, EC3.2.1.113)	EST (expressed sequence tag)	AJ489152, NCBI									S3a8	83			PGSC0003DMG402009189	Soltu.DM03G037720	60418581..60416489	62036100..62029000	65051324..65049851	Solyc03g123900
3	At2E05 (AT4G14320)		A. thaliana	52.55	Arabidopsis EST marker (Ribosomal protein L44, RL44)	EST (expressed sequence tag)	AA713144, NCBI, AT4G14320, TAIR									At2E5-b	85.001			# PGSC0003DMG400009191	# Soltu.DM03G037750(a), Soltu.DM03G026710(a)	60471129..60471311(a), 51500713..51500531(b)	62095500..62080900	65097786..65098065(a), 57578886..57578704(b)	# Solyc03g123940(a), Solyc03g112850(a)
3	S1b2		S. tuberosum	52.55	Potato EST marker (Ribosomal protein L41, RL41)	EST (expressed sequence tag)	AJ489104, NCBI									S1b2-b	85.002			# PGSC0003DMG400009191	# Soltu.DM03G037750	60471129..60471461	62089133..62089465	65097786..65098117	# Solyc03g123940
3	St_At3g20240		S. tuberosum	212	Potato ortholog to Sl_At3g20240 (mitochondrial substrate carrier family protein)	COS2 (conserved orthologous sequence)	At3g20240, TAIR									St_At3g20240	85.004			# PGSC0003DMG400009192	# Soltu.DM03G037790	60525987..60522608	62140930..62145920	65138476..65135111	# Solyc03g123990
3	TG244		S. lycopersicum	19,32,185,218,312	Tomato STS marker, South border of tomato IL3-5, distal to tomato QTL for fruit soluble solids (Brix) and total yield	STS (sequence-tagged-site)	TG244, SGN	TG244	127,7	TG244	63.5	TG244	68	TG244	37					# PGSC0003DMG400009192	# Soltu.DM03G037790	60526558..60526261	62140930..62145920	65139056..65138761	# Solyc03g123990
3	PSTR-d		S. spegazzinii	5,6,8,13,16	Potato subtelomeric repeat	STS (sequence-tagged-site)	spg108, Ref. 5									PSTR-d	90			intergenic	intergenic(a,b)	60666563..60666036(a), 60701760..60701538(b) et al.	~62285767..62285488	no matching position
