# Supplementary material for: A physical map of traits of agronomic importance based on potato and tomato genome sequences
Source: Front Genet. 2023 Jul 25;14:1197206. doi: 10.3389/fgene.2023.1197206 (PMC10411547; doi:10.3389/fgene.2023.1197206)
Supplement: Supplementary file 4 [file Table15.XLSX]

## Sheet: References
Reference number (Table S1 to S12, column E)	Trait	R genes and QRL in potato (p), tomato (t), pepper (pe) and eggplant (me)	Locus abbreviation for R genes and QRL	QTL (yield, sugar content, maturity) in potato/tomato	Locus abbreviation for QTL	Digital object identifier (DOI)	Authors	Year	Journal	Volume	Pages	Title
1						https://doi.org/10.1007/BF00299755	Gebhardt C, Ritter E, Debener T, Schachtschabel U, Walkemeier B, Uhrig H, Salamini F	1989	Theor Appl Genet	78	65-75	RFLP analysis and linkage mapping in Solanum tuberosum
2	Yield			p_QTL	pTY	https://doi.org/10.1007/s001220051645	Chen X, Salamini F, Gebhardt C	2001	Theor Appl Genet	102	284-295	A potato molecular function map for carbohydrate metabolism and transport.
3	Resistance to Phytophthora, maturity	p_QRL	pLBR	p_QTL	pM	https://doi.org/10.1023/A:1009601427062	Collins A, Milbourne D, Ramsay L, Meyer R, Chatot-Balandras C, Oberhagemann P, De Jong W, Gebhardt C, Bonnel E, Waugh R	1999	Mol Breeding	5	387-398	QTL for field resistance to late blight in potato are strongly correlated with earliness and vigour.
4						https://doi.org/10.1007/s001220051573	Dong F, Song J, Naess SK, Helgeson JP, Gebhardt C, Jiang J	2000	Theor Appl Genet	101	1001-1007	Development and applications of a set of chromosome-specific cytogenetic DNA markers in potato.
5						https://doi.org/10.1017/S001667230003295X	Gebhardt C, Eberle B, Leonards-Schippers C, Walkemeier B, Salamini F	1995	Genet Res, Camb.	65	1-10	Isolation, characterization and RFLP linkage mapping of a DNA repeat family of Solanum spegazzinii by which chromosome ends can be localized on the genetic map of potato.
6						https://doi.org/10.1007/BF00229225	Gebhardt C, Ritter E, Barone A, Debener T, Walkemeier B, Schachtschabel U, Kaufmann H, Thompson RD, Bonierbale MW, Ganal MW, Tanksley SD, Salamini F	1991	Theor Appl Genet	83	49-57	RFLP maps of potato and their alignment with the homeologous tomato genome
7						https://doi.org/10.1007/978-94-011-1104-1_16	Gebhardt C, Ritter E, Salamini F	1994	in: DNA-based markers in plants, eds. Phillips RL, Vasil IK, Advances in Cellular and Molecular Biology of Plants, Kluwer Academic Publishers Dordrecht/Boston/London	1st edition	271-285	RFLP map of the potato.
8						https://doi.org/10.1007/978-94-015-9815-6_18	Gebhardt C, Ritter E, Salamini F	2001	in: DNA-based markers in plants, eds. Phillips RL, Vasil IK, Advances in Cellular and Molecular Biology of Plants, Kluwer Academic Publishers Dordrecht/Boston/London	2nd edition	319-336	RFLP map of the potato.
9						DOI: 10.1146/annurev.phyto.39.1.79	Gebhardt C, Valkonen JPT	2001	Annu Rev Phytopathol	39	79-102	Organization of genes controlling disease resistance in the potato genome.
10						doi: 10.1093/genetics/155.2.873	Grube RC, Radwanski ER, Jahn M	2000	Genetics	155	873-887	Comparative genetics of disease resistance within the Solanaceae
11	Resistance to nematode Meloidogyne	t_R	Mi			https://doi.org/10.1046/j.1365-313X.1992.t01-8-00999.x	Ho J-Y, Weide R, Ma HM, van Wordragen MF, Lambert KN, Koornneef M, Zabel P, Williamson M	1992	The Plant Journal	2	971-982	The root-knot nematode resistance gene (Mi) in tomato: construction of a molecular linkage map and identification of dominant cDNA markers in resistant genotypes.
12	Resistance to nematode Meloidogyne	t_R	Mi			https://doi.org/10.1007/BF00226734	Klein-Lankhorst R, Rietveld P, Machiels B, Verkerk R, Weide R, Gebhardt C, Koornneef M, Zabel P	1991	Theor Appl Genet	81	661-667	RFLP markers linked to the root knot nematode resistance gene Mi in tomato.
13						https://doi.org/10.1038/ng1296-421	Leister D, Ballvora A, Salamini F, Gebhardt C	1996	Nature Genetics	14	421-429	A PCR based approach for isolating pathogen resistance genes from potato with potential for wide application in plants.
14	Resistance to Phytophthora	p_QRL	pLBR			https://doi.org/10.1093/genetics/137.1.67	Leonards-Schippers C, Gieffers W, Schäfer-Pregl R, Ritter E, Knapp SJ, Salamini F, Gebhardt C	1994	Genetics	137	67-77	Quantitative resistance to Phytophthora infestans in potato: a case study for QTL mapping in an allogamous plant species.
15	Resistance to nematode Meloidogyne	t_R	Mi			https://doi.org/10.1007/BF00226787	Messeguer R, Ganal M, de Vicente MC, Young ND, Bolkan H, Tanksley SD	1991	Theor Appl Genet	82	529-536	High resolution RFLP map around the root knot nematode resistance gene (Mi) in tomato.
16						https://doi.org/10.1007/s004380050809	Milbourne D, Meyer RC, Collins AJ, Ramsay LD, Gebhardt C, Waugh R	1998	Mol Gen Genet	259	233-245	Isolation, characterization and mapping of simple sequence repeat loci in potato.
17	Resistance to Phytophthora	p_QRL	pLBR			. https://doi.org/10.1023/A:1009623212180	Oberhagemann P, Chatot-Balandras C, Bonnel E, Schäfer-Pregl R, Wegener D, Palomino C, Salamini F, Gebhardt C	1999	Mol Breeding	5	399-415	A genetic analysis of quantitative resistance to late blight in potato: Towards marker assisted selection.
18	Yield			p_QTL	pTY	https://doi.org/10.1007/s001220050963	Schäfer-Pregl R, Ritter E, Concilio L, Hesselbach J, Lovatti L, Walkemeier B, Thelen H, Salamini F, Gebhardt C	1998	Theor Appl Genet	97	834-846	Analysis of quantitative trait loci (QTL) and quantitative trait alleles (QTA) for potato tuber yield and starch content.
19						doi: 10.1093/genetics/132.4.1141	Tanksley SD, Ganal MW, Prince JP, de Vicente MC, Bonierbale MW, Broun P, Fulton TM, Giovannoni JJ, Grandillo S, Martin GB, Messeguer R, Miller JC, Miller L, Paterson AH, Pineda O, Röder MS, Wing RA, Wu W, Young ND	1992	Genetics	132	1141-1160	High density molecular linkage maps of the tomato and potato genomes.
20	Resistance to fungus Oidium	t_R	Ol-1			doi: 10.1007/BF00225382. PMID: 24177896.	Van der Beek JG, Pet G, Lindhout P	1994	Theor Appl Genet	89	467-473	Resistance to powdery mildew (Oidium lycopersicum) in Lycopersicon hirsutum is controlled by an incompletely dominant gene Ol-1 on chromosome 6
21						https://doi.org/10.1007/BF00042070	Matton DP, Mau S-L, Okamoto S, Clarke AE, Newbigin E.	1995	Plant Mol Biol	28	847-858	The S-locus of Nicotiana alata: genomic organization and sequence analysis of two S-RNase alleles
22						https://doi.org/10.1073/pnas.261571598	Golz JF, Oh HY, Su V, Kusaba M, Newbigin E	2001	Proc. Natl. Acad. Sci. U.S.A.	98	15372-15376	Genetic analysis of Nicotiana pollen-part mutants is consistent with the presence of an S-ribonuclease inhibitor at the S locus
23	Resistance to bacterium Erwinia	p_QRL	Eca			https://doi.org/10.2135/cropsci2000.4041156x	Zimnoch-Guzowska E, Marczewski W, Lebecka R, Flis B, Schäfer-Pregl R, Salamini F, Gebhardt C	2000	Crop Science	40	1156-1167	QTL analysis of new sources of resistance to Erwinia carotovora ssp. atroseptica in potato done by AFLP, RFLP and resistance-gene-like markers.
24						https://doi.org/10.1007/s001220051376	Li J-H, Nass N, Kusaba M, Dodds PN, Treloar N, Clarke AE, Newbigin E	2000	Theor Appl Genet	100	956-964	A genetic map of the Nicotiana alata S locus that includes three pollen-expressed genes.
25						https://doi.org/10.1046/j.1365-313x.1998.00336.x	Ten Hoopen R, Harbord RM, Maes T, Nanninga N, Robbins TP	1998	Plant J	16	729-734	The self-incompatibility (S) locus in Petunia hybrida is located on chromosome III in a region, syntenic for the Solanaceae.
26						https://doi.org/10.1007/BF00260659	Kaufmann H, Salamini F, Thompson RD	1991	Mol Gen Genet	226	457-466	Sequence variability and gene structure at the self-incompatibility locus of Solanum tuberosum.
27						https://doi.org/10.1007/BF00196397	Wemmer T, Kaufmann H, Kirch H-H, Schneider K, Lottspeich F, Thompson RD	1994	Planta	194	264-273	The most abundant soluble basic protein of the stylar transmitting tract in potato (Solanum tubersosum L.) is an endochitinase.
28	Resistance to bacterium Pseudomonas	t_R	Prf			DOI:https://doi.org/10.1016/S0092-8674(00)80083-5	Salmeron,J.M., Oldroyd,G.E., Rommens,C.M., Scofield,S.R., Kim,H.S., Lavelle,D.T., Dahlbeck,D. and Staskawicz,B.J.	1996	Cell	86	123-133	Tomato Prf is a member of the leucine-rich repeat class of plant disease resistance genes and lies embedded within the Pto kinase gene cluster
29	Resistance to Phytophthora	p_QRL	pLBR			DOI: 10.1094/MPMI.2002.15.6.587	Trognitz F, Manosalva P, Gysin R, Nino-Liu D, Simon R, Herrera M del R, Trognitz B, Ghislain M, Nelson R	2002	Mol Plant Microbe Interact	15	587-597	Plant defense genes associated with quantitative resistance to potato late blight in Solanum phureja x dihaploid S. tuberosum hybrids.
30						https://doi.org/10.1007/BF00299747	Gebhardt C, Blomendahl C, Schachtschabel U, Debener T, Salamini F, Ritter E	1989	Theor Appl Genet	78	16-22	Identification of 2n breeding lines and 4n varieties of potato (Solanum tuberosum, ssp tuberosum) with RFLP-fingerprints.
31						https://doi.org/10.2135/cropsci1992.0011183X003200030048x	Görg R, Schachtschabel U, Ritter E, Salamini F, Gebhardt C	1992	Crop Science	32	815-819	Discrimination among 136 tetraploid potato varieties by fingerprints using highly polymorphic DNA markers.
32						DOI: 10.1093/genetics/155.1.309	Pan Q, Liu Y-S, Budai-Hadrian O, Sela M, Carmel-Goren L, Zamir D, Fluhr R	2000	Genetics	155	309-322	Comparative genetics of nucleotide binding site-leucine rich repeat resistance gene homologues in the genomes of two dicotyledons: Tomato and Arabidopsis.
33	Resistance to Phytophthora	p_R	R1			DOI: 10.1046/j.1365-313x.2001.01292.x	Ballvora A, Ercolano MR, Weiß J, Meksem K, Bormann C, Oberhagemann P, Salamini F, Gebhardt C	2002	Plant J	30	361-371	The R1 gene for potato resistance to late blight (Phytophthora infestans) belongs to the leucine zipper/NBS/LRR class of plant resistance genes.
34	Resistance to Phytophthora	p_R	R2			https://doi.org/10.1007/s001220050847	Li X, van Eck HJ, Rouppe van der Voort JNAM, Huigen D-J, Stam P, Jacobsen E	1998	Theor Appl Genet	96	1121-1128	Autotetraploids and genetic mapping using common AFLP markers: The R2 allele conferring resistance to Phytophthora infestans mapped on potato chromosome 4.
35	Resistance to virus PVX	p_R	Nb			https://doi.org/10.1007/s001220050555	De Jong W, Forsyth A, Leister D, Gebhardt C, Baulcombe DC	1997	Theor Appl Genet	95	246-252	A potato hypersensitive resistance gene against potato virus X maps to a resistance gene cluster on chromosome 5.
36	Resistance to Phytophthora	p_R	R1			DOI: 10.1007/BF00290238	Meksem K, Leister D, Peleman J, Zabeau M, Salamini F, Gebhardt C	1995	Mol Gen Genet	249	74-81	A high-resolution map of the vicinity of the R1 locus on chromosome V of potato based on RFLP and AFLP markers.
37	Resistance to Phytophthora	p_R	R1			DOI: 10.1007/BF00587589	Leonards-Schippers C, Gieffers W, Salamini F, Gebhardt C	1992	Mol Gen Genet	233	278-283	The R1 gene conferring race-specific resistance to Phytophthora infestans in potato is located on potato chromosome V.
38	Resistance to nematode Globodera rostochiensis	p_R	Gro1, H1			https://doi.org/10.1007/BF01682090	Niewöhner J, Salamini F, Gebhardt C	1995	Mol Breeding	1	65-78	Development of PCR assays diagnostic for RFLP markers closely linked to alleles Gro1 and H1, conferring resistance to the root cyst nematode Globodera rostochiensis in potato.
39	Resistance to nematode Globodera rostochiensis	p_R	H1			https://doi.org/10.1007/BF00220911	Gebhardt C, Mugniery D, Ritter E, Salamini F, Bonnel C	1993	Theor Appl Genet	85	541-544	Identification of RFLP markers closely linked to the H1 gene conferring resistance to Globodera rostochiensis in potato.
40	Resistance to bacterium Ralstonia	t_QRL	tBWR			doi: 10.1270/jsbbs.20027	Abebe AM, Choi J, Kim Y, Oh C-S, Yeam I, Nou I-S, Lee JM	2020	Breeding Science	70	462–473	Development of diagnostic molecular markers for marker-assisted breeding against bacterial wilt in tomato
41	Resistance to nematode Globodera pallida	p_QRL	Gpa			DOI: 10.1007/BF01253983	Kreike CM, de Koning JRA, Vinke JH, van Ooijen JW, Stiekema WJ	1994	Theor Appl Genet	88	764-769	Quantitatively-inherited resistance to Globodera pallida is dominated by one major locus in Solanum spegazzinii.
42	Resistance to virus PVX	p_R	Rx1, Rx2			DOI: 10.1007/BF00260710	Ritter E, Debener T, Barone A, Salamini F, Gebhardt C	1991	Mol Gen Genet	227	81-85	RFLP mapping on potato chromosomes of two genes controlling extreme resistance to potato virus X (PVX)
43	Resistance to nematode Globodera rostochiensis, pallida	p_QRL	Grp1			https://doi.org/10.1007/s001220050785	van der Voort J, Lindeman W, Folkertsma R, Hutten R, Overmars H, van der Vossen E, Jacobsen E, Bakker J	1998	Theor Appl Genet	96	654-61	A QTL for broad-spectrum resistance to cyst nematode species (Globodera spp.) maps to a resistance gene cluster in potato.
44	Resistance to nematode Globodera pallida	p_QRL	Gpa5, Gpa6			https://doi.org/10.1007/s001220051588	van der Voort JR, van der Vossen E, Bakker E, Overmars H, van Zandvoort P, Hutten R, Klein-Lankhorst R, Bakker J.	2000	Theor Appl Genet	101	1122-30	Two additive QTLs conferring broad-spectrum resistance in potato to Globodera pallida are localized on resistance gene clusters.
45						https://doi.org/10.1105/tpc.12.7.1153	Barker L, Kühn C, Weise A, Schulz A, Gebhardt C, Hirner B, Hellmann H, Schulze W, Ward JM, Frommer WB	2000	The Plant Cell	12	1153-1164	SUT2, a putative sucrose sensor in sieve elements
46	Resistance to nematode Globodera pallida	p_QRL	Gpa5			https://doi.org/10.1007/s00122-002-0873-9	Bryan GJ, McLean K, Bradshaw JE, De Jong WS, Phillips M, Castelli L, Waugh R	2002	Theor Appl Genet	105	68-77	Mapping QTLs for resistance to the cyst nematode Globodera pallida derived from the wild potato species Solanum vernei.
47	Yield			t_QTL	tFW	DOI: 10.1007/s00122-007-0699-6	Mazzucato A, Papa R, Bitocchi E, Mosconi P, Nanni L, Negri V, Picarella ME, Siligato F, Soressi GP, Tiranti B, Veronesi F	2008	Theor Appl Genet	116	657-669	Genetic diversity, structure and marker-trait associations in a collection of Italian tomato (Solanum lycopersicum L.) landraces.
48	Resistance to nematode Globodera rostochiensis	p_R	Gro1			https://doi.org/10.1007/BF00271550	Barone A, Ritter E, Schachtschabel U, Debener T, Salamini F, Gebhardt C	1990	Mol Gen Genet	224	177-182	Localization by restriction fragment length polymorphism mapping in potato of a major dominant gene conferring resistance to the potato cyst nematode Globodera rostochiensis.
49	Resistance to nematode Globodera rostochiensis	p_R	Gro1			https://doi.org/10.1007/BF00290239	Ballvora A, Hesselbach J, Niewöhner J, Leister D, Salamini F, Gebhardt C	1995	Mol Gen Genet	249	82-90	Marker enrichment and high resolution map of the segment of potato chromosome VII harboring the nematode resistance gene Gro1.
50	Resistance to Phytophthora	p_QRL	pLBR			doi: 10.1093/g3journal/jkab251	Lindqvist-Kreuze H, De Boeck B, Unger P, Gemenet D, Li X, Pan Z, Sui Q, Qin J, Woldegjorgis G, Negash K, Seid I, Hirut B, Gastelo M, De Vega J, Bonierbale M	2021	G3 Genes|Genomes|Genetics	11	jkab251	Global multi-environment resistance QTL for foliar late blight resistance in tetraploid potato with tropical adaptation
51	Resistance to Phytophthora	p_R	Rpi-blb1			https://doi.org/10.1007/s001220051533	Naess SK, Bradeen JM, Wielgus SM, Haberlach GT, McGrath JM, Helgeson JP	2000	Theor Appl Genet	101	697-704	Resistance to late blight in Solanum bulbocastanum is mapped to chromosome 8.
52						https://doi.org/10.1046/j.1365-313X.2003.01747.x	Gebhardt C, Walkemeier B, Henselewski H, Barakat A, Delseny M, Stüber K	2003	The Plant Journal	34	529-541	Comparative mapping between potato (Solanum tuberosum) and Arabidopsis thaliana reveals structurally conserved domains and ancient duplications in the potato genome.
53						https://doi.org/10.1046/j.1467-7652.2003.00036.x	Rickert AM, Kim JH, Meyer S, Nagel A, Ballvora A, Oefner PJ, Gebhardt C	2003	Plant Biotechnology J	1	399-410	First-generation SNP/InDel markers tagging loci for pathogen resistance in the potato genome.
54	Yield, sugars			t_QTL	tFW, tSS	DOI: 10.1534/g3.112.002667	Ranc N, Muños S, Xu J, Le Paslier M-C, A Chauveau A, Bounon R, Rolland S, Bouchet J-P, Brunel D, Causse M	2012	G3 Genes|Genomes|Genetics	2	853–864	Genome-wide association mapping in tomato (Solanum lycopersicum) is possible using genome admixture of Solanum lycopersicum var. Cerasiforme.
55						DOI: 10.1046/j.1467-7652.2003.00009.x	Dominguez I, Graziano E, Gebhardt C, Barakat A, Berry S, Arús P, Delseny M, Barnes S	2003	Plant Biotechnology J	1	91-99	Plant genome archeology: evidence for conserved ancestral chromosome segments in dicotyledonous plant species.
56	Resistance to virus PVX	p_R	Rx			https://doi.org/10.1007/s001220050543	Bendahmane A, Kanyuka K, Baulcombe DC	1997	Theor Appl Genet	95	153-162	High resolution genetical and physical mapping of the Rx gene for extreme resistance to potato virus X in tetraploid potato.
57						https://doi.org/10.1007/s00438-003-0860-0	Heibges A, Glaczinski H, Ballvora A, Salamini F, Gebhardt C	2003	Mol Gen Genomics	269	526-534	Structural diversity and genome organization of three families of Kunitz-type enzyme inhibitors from potato tubers (Solanum tuberosum L.).
58						https://doi.org/10.1007/s00438-003-0861-z	Heibges A, Salamini F, Gebhardt C	2003	Mol Gen Genomics	269	535-541	Functional comparison of homologous members of three groups of Kunitz-type inhibitors from potato tubers (Solanum tuberosum L.).
59	Sugars			p_QTL	pTSC	https://doi.org/10.1093/genetics/162.3.1423	Menendez CM, Ritter E, Schäfer-Pregl R, Walkemeier B, Kalde A, Salamini F, Gebhardt C	2002	Genetics	162	1423-1434	Cold-sweetening in diploid potato. Mapping QTL and candidate genes.
60	Resistance to fungus Synchytrium	p_QRL	Sen1			https://doi.org/10.1007/s001220051083	Hehl R, Faurie E, Hesselbach J, Salamini F, Whitham S, Baker B, Gebhardt C	1999	Theor Appl Genet	98	379-386	TMV resistance gene N homologues are linked to Synchytrium endobioticum resistance in potato.
61						https://doi.org/10.1093/jexbot/51.347.1017	Harris N, Foster JM, Kumar A, Davies HV, Gebhardt C, Wray JL	2000	J Exp Botany	51	1017-1026	Two cDNAs representing alleles of the nitrate reductase gene of potato (Solanum tuberosum L. Cv Desiree): Sequence analysis, genome organization and expression.
62	Resistance to virus PVS	p_R	Ns			https://doi.org/10.1007/s00122-002-0976-3	Marczewski W, Hennig J, Gebhardt C	2002	Theor Appl Genet	105	564-567	The Potato virus S gene Ns maps to potato chromosome VIII.
63	Resistance to nematode Globodera pallida	p_QRL	Gpa5			https://doi.org/10.1007/s11032-006-9026-1	Sattarzadeh A, Achenbach U, Lübeck J, Strahwald J, Tacke E, Hofferbert H-R, Rothsteyn T, Gebhardt C	2006	Mol Breed	18	301-312	Single nucleotide polymorphism (SNP) genotyping as basis for developing a PCR-based marker highly diagnostic for potato varieties with high resistance to Globodera pallida pathotype Pa2/3
64	Resistance to virus PLRV	p_QRL	PLRV			https://doi.org/10.1094/MPMI.2001.14.12.1420	Marczewski W, Flis B, Syller J, Schäfer-Pregl R, Gebhardt C	2001	Mol Plant Microbe Interact	14	1420-1425	A major QTL for resistance to Potato leafroll virus (PLRV) is located in a resistance hotspot on potato chromosome XI and is tightly linked to N-gene-like markers.
65	Resistance to Phytophthora, maturity	p_QRL	pLBR	p_QTL	pM	https://doi.org/10.1023/B:MOLB.0000012878.89855.df	Gebhardt C, Ballvora A, Walkemeier B, Oberhagemann P, Schüler K	2004	Mol Breed	13	93-102	Genetic potential assessment in germ plasm collections of crop plants by marker-trait association: a case study for potatoes with quantitative variation of resistance to late blight and maturity type.
66						doi: 10.1186/1471-2164-11-158	Kloosterman B, Oortwijn M, uitdeWilligen J, America T, de Vos R, Visser RG, Bachem CW	2010	BMC Genomics	11	158	From QTL to candidate gene: Genetical genomics of simple and complex traits in potato using a pooling strategy
67	Resistance to Phytophthora	p_QRL	pLBR			https://doi.org/10.3390/genes11070732	Meade F, Hutten R, Wagener S, Prigge V, Dalton E, Kirk HG, Griffin D, Milbourne D	2020	Genes	11	Nr. 732	Detection of Novel QTLs for Late Blight Resistance Derived from the Wild Potato Species Solanum microdontum and Solanum pampasense
68						https://doi.org/10.1016/S0981-9428(99)00117-5	Bocca SN, Kissen R, Rojas-Beltran A, Noel F, Gebhardt C, Moreno S, du Jardin P, Tandecarz JS	1999	Plant Physiol Biochem	37	809-819	Molecular cloning and characterization of the enzyme UDP-glucose: protein transglucosylase from potato.
69	Resistance to fungus Cladosporium	t_R	Cf-2/Cf-5			DOI: 10.1094/MPMI-6-341	Dickinson MJ, Jones DA, Jones JDG	1993	Mol Plant Microbe Interact	6	341-347	Close linkage between the Cf-2/Cf-5 and Mi resistance loci in tomato.
70	Yield			t_QTL	tFY	https://doi.org/10.1007/s00122-017-2857-9	Bauchet G, Grenier S, Samson N, Bonnet J, Grivet L, Causse M	2017	Theor Appl Genet	130	875-889	Use of modern tomato breeding germplasm for deciphering the genetic control of agronomical traits by Genome Wide Association study.
71	Resistance to bacterium Xanthomonas	t_QRL	rx			https://doi.org/10.1093/genetics/141.2.675	Yu ZH, Wang JF, Stall RE, Vallejos CE	1995	Genetics	141	675-682	Genomic localization of tomato genes that control a hypersensitive reaction to Xanthomonas campestris pv vesicatoria.
72	Resistance to fungus Cladosporium	t_R	Cf-9			https://doi.org/10.1007/BF00223988	Van der Beek JG, Verkerk R, Zabel P, Lindhout P	1992	Theor Appl Genet	84	106-112	Mapping strategy for resistance genes in tomato based on RFLPs between cultivars: Cf-9 (resistance to Cladosporium fulvum) on chromosome 1.
73	Resistance to fungus Cladosporium	t_R	Cf-9			DOI: 10.1126/science.7973631	Jones DA, Thomas CM, Hammond-Kosack KE, Balint-Kurti PJ, Jones JDG	1994	Science	266	789-793	Isolation of the tomato Cf-9 gene for resistance to Cladosporium fulvum by transposon tagging.
74	Resistance to fungus Cladosporium	t_R	Cf-4/Cf-9			https://doi.org/10.1007/BF01253972	Balint-Kurti PJ, Dixon MS, Jones DA, Norcott KA, Jones JDG	1994	Theor Appl Genet	88	691-700	RFLP linkage analysis of the Cf-4 and Cf-9 genes for resistance to Cladosporium fulvum in tomato.
75	Resistance to Phytophthora, maturity	p_QRL	pLBR	p_QTL	pM	https://doi.org/10.1094/MPMI.2004.17.10.1126	Bormann CA, Rickert AM, Castillo Ruiz RA, Paal J, Lübeck J, Strahwald J, Buhr K, Gebhardt C	2004	Mol Plant Microbe Interact	17	1126-1138	Tagging QTL for maturity-corrected late blight resistance in tetraploid potato with PCR-based candidate gene markers.
76						PMID: 2132026	Taylor JT, Fritzemeier H, Häuser I, Kombrink E, Rower F	1990	Mol Plant Microbe Interact	3	72-77	Structural analysis and activation by fungal infection of a gene encoding a pathogenesis-related protein in potato.
77	Resistance to virus PVX	p_R	Nx-phu			https://doi.org/10.1007/s001220050810	Tommiska TJ, Hämäläinen JH, Watanabe KN, Valkonen JPT	1998	Theor Appl Genet	96	840-843	Mapping of the gene Nxphu that controls hypersensitive resistance to potato virus X in Solanum phureja IvP35.
78	Resistance to bacterium Pseudomonas	t_R	Pto			DOI: 10.1126/science.7902614	Martin GB, Brommonschenkel SH, Chungwongse J, Frary A, Ganal MW, Spivey R, Wu T, Earle ED, Tanksley SD	1993	Science	262	1432-1436	Map-based cloning of a protein kinase gene conferring disease resistance in tomato.
79	Resistance to bacterium Pseudomonas	t_R	Pto			DOI: 10.1094/MPMI-6-026	Martin GB, de Vicente MC, Tanksley SD	1993	Mol Plant Microbe Interact	6	26-34	High-resolution linkage analysis and physical characterization of the Pto bacterial resistance locus in tomato.
80	Resistance to virus TSWV	t_R	Sw-5			https://doi.org/10.1007/s004380050553	Brommonschenkel SH, Tanksley SD	1997	Mol Gen Genet	256	121-126	Map-based cloning of the tomato genomic region that spans the Sw-5 tospovirus resistance gene in tomato.
81	Resistance to fungus Verticillium	t_R	Ve			https://tgc.ifas.ufl.edu/vol43/vol43.pdf	Zamir D, Bolkan H, Juvik JA, Watterson JC, Tanksley SD	1993	Tom Genet Coop Rep	43	51-52	New evidence for placement of Ve - the gene for resistance to Verticillium race 1.
82	Resistance to bacterium Clavibacter	t_QRL	Cm			https://doi.org/10.1007/s001220051416	Van Heusden AW, Koornneef M, Voorrips RE, Brüggemann W, Pet G, Vrielink-van Ginkel R, Chen X, Lindhout P	1999	Theor Appl Genet	99	1068-1074	Three QTLs from Lycopersicon peruvianum confer a high level of resistance to Clavibacter michiganensis ssp. michiganensis.
83	Resistance to virus TMV	t_R	Tm-2a			doi: 10.1093/genetics/120.2.579	Young ND, Zamir D, Ganal MW, Tanksley SD	1988	Genetics	120	559-585	Use of isogenic lines and simultaneous probing to identify DNA markers tightly linked to the Tm-2a gene in tomato.
84	Resistance to virus TMV	t_R	Tm-2			https://doi.org/10.1007/BF00305828	Young ND, Tanksley SD	1989	Theor Appl Genet	77	353-359	RFLP analysis of the size of chromosomal segments retained around the Tm-2 locus of tomato during backcross breeding.
85	Resistance to fungus Fusarium	t_R	Fr1			https://doi.org/10.1111/j.1744-7348.1997.tb06835.x	Vakalounakis DJ, Laterrot H, Moretti A, Ligoxigakis EK, Smardas K	1997	Ann Appl Biol	130	319-323	Linkage between Fr1 (Fusarium oxysporum f.sp. radicis-lycopersici resistance) and Tm-2 (tobacco mosaic virus resistance-2) loci in tomato (Lycopersicon esculentum).
86	Resistance to fungus Verticillium	t_R	Ve1, Ve2			https://doi.org/10.1073/pnas.091114198	Kawchuk LM, Hachey J, Lynch DR, Kulcsar F, van Rooijen G, Waterer DR, Robertson A, Kokko E, Byers R, Howerd HR, Fischer R, Prüfer D	2001	Proc Natl Acad Sci USA	98	6511-6515	Tomato Ve disease-resistance genes encode cell surface-like receptors.
87	Resistance to fungus Verticillium	t_R	Ve1, Ve2			https://doi.org/10.1007/s001220051075	Diwan N, Fluhr R, Eshed Y, Zamir D, Tanksley SD	1999	Theor Appl Genet	98	315-319	Mapping of Ve in tomato: a gene conferring resistance to the broad-spectrum pathogen, Verticillium dahliae race 1.
88	Resistance to fungus Verticillium	p_QRL	StVe1			https://doi.org/10.1007/s00122-003-1431-9	Simko I, Costanzo S, Haynes KG, Christ BJ, Jones RW	2004	Theor Appl Genet	108	217-224	Linkage disequilibrium mapping of a Verticillium dahliae resistance quantitative trait locus in tetraploid potato (Solanum tuberosum) through a candidate gene approach.
89	Resistance to fungus Pyrenochaeta	t_R	py-1			https://doi.org/10.1007/s001220050956	Doganlar S, Dodson J, Gabor B, Beck-Bunn T, Crossman C, Tanksley SD	1998	Theor Appl Genet	97	784-788	Molecular mapping of the py-1 gene for resistance to corky root rot (Pyrenochaeta lycopersici) in tomato.
90	Resistance to Phytophthora	p_QRL	pLBR			https://doi.org/10.1023/A:1009648408198	Ewing EE, Simko I, Smart CD, Bonierbale MW, Mizubuti ESG, May GD, Fry WE	2000	Mol Breeding	6	25-36	Genetic mapping from field tests of quantitative and qualitative resistance to Phytophthora infestans in a population derived from Solanum tuberosum and Solanum berthaultii.
91	Resistance to nematode Globodera rostochiensis	p_QRL	Gro1.2			https://doi.org/10.1007/BF00223694	Kreike CM, Kok-Westeneng AA, Vinke JH, Stiekema WJ	1996	Theor Appl Genet	92	463-470	Mapping of QTLs involved in nematode resistance, tuber yield and root development.
92	Resistance to fungus Alternaria	t_R	Asc			https://doi.org/10.1007/BF00293147	Van der Biezen EA, Glagotskaya T, Overduin B, Nijkamp HJJ, Hille J	1995	Mol Gen Genet	247	453-461	Inheritance and genetic mapping of resistance to Alternaria alternata f.sp. lycopersici in Lycopersicon pennellii.
93	Resistance to fungus Alternaria	t_R	Asc			https://doi.org/10.1073/pnas.97.9.4961	Brandwagt BF, Mesbah LA, Takken FLW, Laurent PL, Kneppers TJA, JHille J, Nijkamp HJJ	2000	Proc Natl Acad Sci USA	97	4961-4966	A longevity assurance gene homolog of tomato mediates resistance to Alternaria alternata f. sp. lycopersici toxins and fumonisin B1.
94						https://doi.org/10.1016/S0021-9258(18)93010-3	Becker-André M, Schulze-Lefert P, Hahlbrock K	1991	J Biol Chem	266	8551-8559	Structural comparison, mode of expression, and putative cis-acting elements of the two 4-coumarate: CoA ligase genes in potato.
95	Resistance to Phytophthora	t_R	Ph-3			https://doi.org/10.1080/14620316.2002.11511493	Chunwongse J, Chunwongse C, Black L, Hanson P	2002	J Horticultural Science and Biotechnology	77	281-286	Molecular mapping of the Ph-3 gene for late blight resistance in tomato.
96	Resistance to nematode Globodera rostochiensis	p_R	Gro1-4			https://doi.org/10.1111/j.1365-313X.2004.02047.x	Paal J, Henselewski H, Muth J, Meksem K, Menéndez CM, Salamini F, Ballvora A, Gebhardt C	2004	Plant J	38	285-297	Molecular cloning of the potato Gro1-4 gene conferring resistance to pathotype Ro1 of the root cyst nematode Globodera rostochiensis, based on a candidate gene approach.
97	Resistance to nematode Globodera rostochiensis	t_R	Hero			DOI: 10.1094/MPMI-8-0886	Ganal MW, Simon R, Brommonschenkel S, Arndt M, Phillips MS, Tanksley SD, Kumar A	1995	Mol Plant-Microbe Interact	8	886-891	Genetic mapping of a wide spectrum nematode resistance gene (Hero) against Globodera rostochiensis in tomato.
98	Resistance to nematode Globodera rostochiensis	t_R	Hero			https://doi.org/10.1046/j.1365-313X.2002.01341.x	Ernst K, Kumar A, Kriseleit D, Kloos D-U, Phillips MS, Ganal MW	2002	Plant J	31	127-136	The broad-spectrum potato cyst nematode resistance gene (Hero) from tomato is the only member of a large gene family of NBS-LRR genes with an unusual amino acid repeat in the LRR region.
99	Resistance to bacterium Ralstonia	t_QRL	tBWR			https://doi.org/10.1007/s00122-006-0277-3	Carmeille A, Caranta C, Dintinger J, Prior P, Luisetti J, Besse P	2006	Theor Appl Genet	113	110-121	Identification of QTLs for Ralstonia solanacearum race 3-phylotype II resistance in tomato
100	Resistance to nematode Globodera pallida	p_QRL	Gpa			https://doi.org/10.1007/s001220050886	Bradshaw JE, Hackett CA, Meyer RC, Milbourne D, McNicol JW, Phillips MS, Waugh R	1998	Theor Appl Genet	97	202-210	Identification of AFLP and SSR markers associated with quantitative resistance to Globodera pallida (Stone) in tetraploid potato (Solanum tuberosum subsp. tuberosum) with a view to marker-assisted selection.
101	Resistance to virus PVY	p_R	Ny-tbr			https://doi.org/10.1007/s001220100749	Celebi-Toprak F, Slack SA, Jahn MM	2002	Theor Appl Genet	104	669-674	A new gene, Nytbr, for hypersensitivity to Potato virus Y from Solanum tuberosum maps to chromosome IV.
102	Yield, maturity			t_QTL	tFW, tM	https://doi.org/10.1007/BF00022528	Lindhout P, Van Heusden S, Pet G, van Ooijen JW, Sandbrink H, Verkerk R, Vrielink R, Zabel P	1994	Euphytica	79	279–286	Perspectives of molecular marker assisted breeding for earliness in tomato.
103	Resistance to Phytophthora	p_QRL	pLBR			https://doi.org/10.1023/A:1009697318518	Sandbrink JM, Colon LT, Wolters PJCC, Stiekema WJ	2000	Mol Breeding	6	215-225	Two related genotypes of Solanum microdontum carry different segregating alleles for field resistance to Phytophthora infestans.
104	Resistance to bacterium Xanthomonas	t_R	Bs4			https://doi.org/10.1007/s004380100583	Ballvora A, Schornack S, Baker BJ, Ganal M, Bonas U, Lahaye BJ	2001	Mol Gen Genomics	266	639-645	Chromosome landing at the tomato Bs4 locus.
105	Resistance to bacterium Xanthomonas	t_R	Bs4			https://doi.org/10.1046/j.1365-313X.2003.01937.x	Schornack S, Ballvora A, Gürlebeck D, Peart J, Ganal M, Baker B, Bonas U, Lahaye T	2004	Plant J	37	65-67	The tomato resistance protein Bs4 is a predicted non-nuclear TIR-NB-LRR protein that mediates defense responses to severely truncated derivatives of AvrBs4 and overexpressed AvrBs3.
106	Resistance to virus PVX	p_R	Rx2			https://doi.org/10.1046/j.1365-313x.2000.00654.x	Bendahmane A, Querci M, Kanyuka K, Baulcombe DC	2000	Plant J	21	73-81	Agrobacterium transient expression system as a tool for the isolation of disease resistance genes: application to the Rx2 locus in potato.
107	Resistance to nematode Globodera pallida	p_QRL	Gpa			https://doi.org/10.1007/s00122-003-1211-6	Caromel B, Mugniéry D, Lefebvre V, Andrzejewski S, Ellissèche D, Kerlan MC, Rousselle P, Rousselle-Bourgeois F	2003	Theor Appl Genet	106	1517-1523	Mapping QTLs for resistance against Globodera pallida (Stone) Pa2/3 in a diploid potato progeny originating from Solanum spegazzinii.
108	Resistance to nematode Globodera rostochiensis	p_R	H1			https://doi.org/10.1139/g93-019	Pineda O, Bonierbale MW, Plaisted RL, Brodie BB, Tanksley SD	1993	Genome	36	152-156	Identification of RFLP markers linked to the H1 gene conferring resistance to the potato cyst nematode Globodera rostochiensis.
109	Resistance to nematode Globodera rostochiensis	p_R	GroV1			https://doi.org/10.1007/BF00171351	Jacobs JME, Van Eck HJ, Horsman K, Arens PFP, Verkerk-Bakker B, Jacobsen E, Pereira A, Stiekema WJ	1996	Mol Breeding	2	51-60	Mapping of resistance to the potato cyst nematode Globodera rostochiensis from the wild potato species Solanum vernei.
110	Resistance to fungus Cladosporium	t_R	Cf-2			https://doi.org/10.1016/S0092-8674(00)81290-8	Dixon MS, Jones DA, Keddie JS, Thomas CM, Harrison K, Jones JDG	1996	Cell	84	451-459	The tomato Cf-2 disease resistance locus comprises two functional genes encoding leucine-rich repeat proteins.
111	Resistance to fungus Cladosporium	t_R	Cf-5			doi: 10.1105/tpc.10.11.1915	Dixon MS, Hatzixanthis K, Jones DA, Harrison K, Jones JDG	1998	Plant Cell	10	1915-1925	The tomato Cf-5 disease resistance gene and six homologs show pronounced allelic variation in leucine-rich repeat copy number.
112	Sugars			p_QTL	pTSC	DOI: 10.1186/s12863-017-0489-3	Duarte-Delgado D, Juyo D, Gebhardt C, Sarmiento F, Mosquera-Vasques	2017	BMC Genetics	18	23	Novel SNP markers in InvGE and SssI genes are associated with natural variation of sugar contents and frying color in Solanum tuberosum Group Phureja.
113	Resistance to insect Macrosiphum	t_R	Meu1			https://doi.org/10.1073/pnas.92.2.622	Kaloshian I, Lange WH, Williamson VM	1995	Proc Natl Acad Sci USA	92	622-625	An aphid-resistance locus is tightly linked to the nematode resistance gene, Mi, in tomato.
114	Resistance to nematode Meloidogyne	t_R	Mi			doi: 10.1105/tpc.10.8.1307	Milligan SB, Bodeau J, Yaghoobi J, Kaloshian I, Zabel P, Williamson VM	1998	Plant Cell	10	1307-1319	The root knot nematode resistance gene Mi from tomato is a member of the leucine zipper, nucleotide binding, leucine-rich repeat family of plant genes.
115	Resistance to Nematode Meloidogyne, resistance to insect aphid	t_R	Mi/Meu			https://doi.org/10.1073/pnas.95.17.9750	Rossi M, Goggin FL, Milligan SB, Kaloshian I, Ullmann DE, Williamson VM	1998	Proc Natl Acad Sci USA	95	9750-9754	The nematode resistance gene Mi of tomato confers resistance against the potato aphid.
116	Resistance to nematode Meloidogyne	t_R	Mi-1			https://doi.org/10.1038/4350	Vos P, Simons G, Jesse T, Wijbrandi J, Heinen L et al.	1998	Nat Biotechnology	16	1365-1369	The tomato Mi-1 gene confers resistance to both root-knot nematodes and potato aphids.
117	Resistance to fungus Oidium	t_R	ol-2			https://doi.org/10.1094/MPMI-21-1-0030	Bai Y, Pavan S, Zheng Z, Zappel NF, Reinstädler A, Lotti C, De Giovanni C, Ricciardi L, Lindhout P, Visser R, Theres K, Panstruga R	2008	Mol Plant-Microbe Interact	21	30-39	Naturally occurring broad-spectrum powdery mildew resistance in a central american tomato accession is caused by loss of Mlo function
118						https://doi.org/10.1073/pnas.85.4.1136	Logemann J, Mayer JE, Schell J, Willmitzer L	1988	Proc Natl Acad Sci USA	85	1136-1140	Differential expression of genes in potato tubers after wounding.
119	Resistance to virus PVY	t_R	pot-1			https://doi.org/10.1007/s00122-002-1005-2	Parrella G, Ruffel S, Moretti A, Morel C, Palloix A, Caranta C	2002	Theor Appl Genet	105	855-861	Recessive resistance genes against potyviruses are localized in colinear genomic regions of the tomato (Lycopersicon spp.) and pepper (Capsicum spp.) genomes.
120	Resistance to virus PVY	pe_QRL	pPVR			https://doi.org/10.1094/MPMI.1997.10.7.872	Caranta C, Lefebvre V, Palloix A	1997	Mol Plant-Microbe Interact	10	872-878	Polygenic resistance of pepper to potyviruses consists of a combination of isolate-specific and broad spectrum quantitative trait loci
121	Resistance to virus PVY	pe_R	pvr1			https://doi.org/10.1094/MPMI.1998.11.10.943	Murphy JF, Blauth JR, Livingstone KD, Lackney VK, Jahn MK	1998	Mol Plant-Microbe Interact	11	943-951	Genetic mapping of the pvr1 locus in Capsicum spp. and evidence that distinct potyvirus resistance loci control responses that differ at whole plant and cellular levels.
122	Resistance to virus PVY	pe_R	pvr2			https://doi.org/10.1046/j.1365-313X.2002.01499.x	Ruffel S, Dussault M-H, Palloix A, Moury B, Bendahmane A, Robaglia C, Caranta C	2002	Plant J	32	1067-1075	A natural recessive resistance gene against potato virus Y in pepper corresponds to the eukaryotic initiation factor 4E (eIF4E).
123	Resistance to virus TYLCV	t_R	TY-1			https://doi.org/10.1007/BF00225889	Zamir D, Ekstein-Michelson I, Zakay Y, Navot N, Zeidan M, Sarfatti M, Eshed Y, Harel E, Pleban T, van-Oss H, Kedar N, Rabinowitch HD, Czosnek H	1994	Theor Appl Genet	88	141-146	Mapping and introgression of a tomato yellow leaf curl virus tolerance gene, TY-1.
124	Resistance to virus TYLCV	t_QRL	qTy			https://journals.ashs.org/downloadpdf/journals/jashs/125/1/article-p15.pdf	Hanson PM, Bernacchi D, Green S, Tanksley SD, Muniyappa V	2000	J Am Soc Hortic Sci	125	15-20	Mapping a wild tomato introgression associated with tomato yellow leaf curl virus resistance in a cultivated tomato line.
125	Resistance to bacterium Ralstonia	t_QRL	tBWR			DOI: 10.1094/MPMI-7-0464	Danesh D, Aarons S, McGill GE, Young ND	1994	Mol Plant-Microbe Interact	7	464-471	Genetic dissection of oligogenic resistance to bacterial wilt in tomato.
126	Resistance to bacterium Ralstonia	t_QRL	tBWR			DOI: 10.1094/MPMI-9-0826	Thoquet P, Olivier J, Sperisen C, Rogowsky P, Laterrot H, Grimsley NH	1996	Mol Plant-Microbe Interact	9	826-836	Quantitative trait loci determining resistance to bacterial wilt in tomato cultivar Hawaii7996.
127	Resistance to bacterium Ralstonia	t_QRL	tBWR			https://doi.org/10.1094/MPMI.2000.13.1.6	Wang J-F, Olivier J, Thoquet P, Mangin B, Sauviac L, Grimsley NH	2000	Mol Plant-Microbe Interact	13	6-13	Resistance of tomato line Hawaii7996 to Ralstonia solanacearum Pss4 in Taiwan is controlled mainly by a major strain-specific locus.
128	Resistance to bacterium Ralstonia	t_QRL	tBWR			doi: 10.1093/genetics/151.3.1165	Mangin B, Thoquet P, Olivier J, Grimsley NH	1999	Genetics	151	1165-1172	Temporal and multiple quantitative trait loci analyses of resistance to bacterial wilt in tomato permit the resolution of linked loci.
129	Resistance to Phytophthora	p_R	R1, R3			https://doi.org/10.1007/BF00283432	El-Kharbotly A, Leonards-Schippers C, Huigen DJ, Jacobsen E, Pereira A, Stiekema WJ, Salamini F, Gebhardt C	1994	Mol Gen Genet	242	749-754	Segregation analysis and RFLP mapping of the R1 and R3 alleles conferring race specific resistance to Phytophthora infestans in progenies of dihaploid potato parents.
130	Resistance to Phytophthora	p_R	R3			https://doi.org/10.1094/MPMI.2004.17.4.428	Huang S, Vleeshouwers GAA, Werij JS, Hutten RCB, van Eck HJ, Visser RGF, Jacobsen E	2004	Mol Plant-Microbe Interact	17	428-435	The R3 resistance to Phytophthora infestans in potato is conferred by two closely linked R genes with distinct specificities
131	Resistance to Phytophthora	p_R	R6, R7			https://doi.org/10.1007/BF00221901	El-Kharbotly, Palomino-Sanchez C, Salamini F, Jacobsen E, Gebhardt C	1996	Theor Appl Genet	92	880-884	R6 and R7 alleles of potato conferring race-specific resistance to Phytophthora infestans (Mont.) de Bary identified genetic loci clustering with the R3 locus on chromosome XI.
132	Resistance to fungus Fusarium	t_R	I2			https://doi.org/10.1007/BF00279789	Segal G, Sarfatti M, Schaffer MA, Ori N, Zamir D, Fluhr R	1992	Mol Gen Genet	231	179-185	Correlation of genetic and physical structure in the region surrounding the I2 Fusarium oxysporum resistance locus in tomato.
133	Resistance to fungus Fusarium	t_R	I2			https://doi.org/10.1105/tpc.9.4.521	Ori N, Eshed Y, Paran I, Presting G, Aviv D, Tanksley S, Zamir D, Fluhr R	1997	Plant Cell	9	521-532	The I2C family from the wilt disease resistance locus I2 belongs to the nucleotide binding, leucine-rich repeat superfamily of plant resistance genes
134	Resistance to fungus Fusarium	t_R	I-3			DOI: 10.1007/BF00226877	Bournival BL, Vallejos CE, Scott JW	1990	Theor Appl Genet	79	641-645	Genetic analysis of resistance to races 1 and 2 of Fusarium oxysporum f.sp. lycopersici from the wild tomato Lycopersicon pennellii.
135	Resistance to fungus Fusarium	t_R	I1			https://doi.org/10.1007/BF00231273	Sarfatti M, Abu-Abied M, Katan J, Zamir D	1991	Theor Appl Genet	82	22-26	RFLP mapping of I1, a new locus in tomato conferring resistance against Fusarium oxysporum f.sp. lycopersici race 1.
136	Resistance to fungus Fusarium	t_R	I2			https://doi.org/10.1105/tpc.10.6.1055	Simons G, Groenendijk J, Wijbrandi J, Reijans M, Groenen J, Diergaarde P, van der Lee T, Bleeker M, Onstenk J, de Both M, Haring M, Mes J, Cornelissen B, Zabeau M, Vos P	1998	Plant Cell	10	1055-1068	Dissection of the Fusarium I2 gene cluster in tomato reveals six homologs and one active gene copy.
137	Bacterium Streptomyces	p_QRL	CSR			https://doi.org/10.1007/s12230-021-09827-2	Koizumi, E., Igarashi, T., Tsuyama, M., Ogawa, K., Asano, K., Kobayashi, A., … Hosaka, K.	2021	Am. J. Potato Res.	98	149-156	Association of genome-wide SNP markers with resistance to common scab of potato.
138	Resistance to virus TMV	pe_R	L			https://doi.org/10.1139/g95-014	Lefebvre V, Palloix A, Caranta C, Pochard E	1995	Genome	38	112-121	Construction of an intra-specific integrated linkage map of pepper using molecular markers and doubled-haploid progenies.
139	Resistance to virus CMV	pe_QRL	CMV			https://doi.org/10.1007/s001220100581	Chaim AB, Grube R, Lapidot M, Jahn M, Paran I	2001	Theor Appl Genet	102	1213-1220	Identification of quantitative trait loci associated with resistance to cucumber mosaic virus in Capsicum annuum.
140	Resistance to bacterium Streptomyces	p_QRL	CSR			https://doi.org/10.1007/s12230-020-09800-5	Kaiser NR, Coombs J, Felcher KJ, Hammerschmidt R, Zuehlke ML, Buell CR, Douches CS	2020	Am. J. Potato Res.	97	513-522	Genome-wide association analysis of common scab resistance and expression profiling of tubers in response to thaxtomin A treatment underscore the complexity of common scab resistance in tetraploid potato.
141	Resistance to Phytophthora	p_R	Rpi1			https://doi.org/10.1007/s004380100490	Kuhl JC, Hanneman Jr. RE, Havey MJ	2001	Mol Gen Genomics	265	977-985	Characterization and mapping of Rpi, a late-blight resistance locus from diploid (1EBN) Mexican Solanum pinnatisectum.
142						https://doi.org/10.1074/jbc.271.35.21012	Rojo J, Vancameyt G, Perez AG, Sanz C, Stormann K, Rosahl S, Sanchez-Serrano JJ	1996	J Biol Chem	271	21012-21019	Characterization of three potato lipoxygenases with distinct enzymatic activities and different organ-specific and wound-regulated expression patterns.
143	Resistance to Phytophthora	p_R	Rpi-blb1			https://doi.org/10.1046/j.1365-313X.2003.01934.x	Van der Vossen E, Sikkema A, te Lintel Hekkert B, Gros J, Stevens P, Muskens M, Wouters D, Pereira A, Stiekema W, Allefs S	2003	Plant J	36	867-882	An ancient R gene from the wild potato species Solanum bulbocastanum confers broad-spectrum resistance to Phytophthora infestans in cultivated potato and tomato
144	Resistance to Phytophthora	p_R	RB			https://doi.org/10.1073/pnas.1533501100	Song J, Bradeen JM, Naess SK, Raasch JA, Wielgus SM, Haberlach GT, Liu J, Kuang H, Austin-Phillips S, Buell CR, Helgeson JP, Jiang J	2003	Proc Natl Acad Sci USA	100	9128-9133	Gene RB cloned from Solanum bulbocastanum confers broad spectrum resistance to potato late blight
145						https://doi.org/10.1023/A:1006136624210	Rojas-Beltran JA, Dubois F, Mortiaux F, Portetelle D, Gebhardt C, Sangwan RS, du Jardin P	1999	Plant Mol Biol	39	449-461	Identification of cytosolic Mg2+ dependent soluble inorganic pyrophosphatases in potato and phylogenetic analysis.
146						https://doi.org/10.1104/pp.109.3.853	Jardin du P, Rojas-Beltran J, Gebhardt C, Brasseur R	1995	Plant Physiol	109	854-860	Molecular cloning and characterization of a soluble inorganic pyrophosphatase in potato.
147	Resistance to nematode Globodera rostochiensis	p_QRL	Gro			https://doi.org/10.1007/BF00215092	Kreike CM, de Koning JRA, Vinke JH, van Ooijen JW, Gebhardt C, Stiekema WJ	1993	Theor Appl Genet	87	464-470	Mapping of loci involved in quantitatively inherited resistance to the potato cyst-nematode Globodera rostochiensis pathotype Ro1
148	Resistance to Phytophthora	t_QRL	Ph-2			https://doi.org/10.1094/MPMI.1998.11.4.259	Moreau P, Thoquet P, Olivier J, Laterrot H, Grimsley N	1998	Mol Plant-Microbe Interact	11	259-269	Genetic mapping of Ph-2, a single locus controlling partial resistance to Phytophthora infestans in tomato.
149	Resistance to Phytophthora	t_QRL	tLBR			https://doi.org/10.1139/g04-001	Brouwer DJ, Jones ES, St. Clair DA	2004	Genome	47	475-492	QTL analysis of quantitative resistance to Phytophthora infestans (late blight) in tomato and comparisons with potato
150	Resistance to Phytophthora	p_R	Rpi-moc1			https://doi.org/10.1007/s00122-004-1820-8	Smilde WD, Brigneti G, Jagger L, Perkins S, Jones JDG	2005	Theor Appl Genet	110	252-258	Solanum mochiquense chromosome IX carries a novel late blight resistance gene Rpi-moc1.
151	Resistance to virus TSWV	t_R	Sw5			https://doi.org/10.1023/A:1011363119763	Spassova MI, Prins TW, Folkertsma RT, Klein-Lankhorst RM, Hille J, Goldbach RW, Prins M	2001	Mol Breeding	7	151-161	The tomato gene Sw5 is a member of the coiled coil, nucleotide binding leucine-rich repeat class of plant resistance genes and confers resistance to TSWV in tobacco.
152						https://doi.org/10.1007/s00438-005-0006-7	Castillo Ruiz RA, Herrera C, Ghislain M, Gebhardt C	2005	Mol Gen Genomics	274	168-179	Organisation of phenylalanine ammonia lyase (PAL), acidic PR-5 and osmotin- like defence-response gene families in the potato genome
153	Resistance to virus PLRV	p_R	PLRV.4			https://doi.org/10.1007/s00122-004-1780-z	Marczewski W, Flis B, Syller J, Strzelczyk-Zyta D, Hennig J, Gebhardt C	2004	Theor Appl Genet	109	1604-1609	Two allelic or tightly linked genetic factors at the PLRV.4 locus on potato chromosome XI control resistance to potato leafroll virus accumulation.
154	Resistance to fungus Stemphylium	t_R	Sm			https://www.apsnet.org/publications/mpmi/BackIssues/Documents/1991Articles/Microbe04_489.pdf	Behare J, Laterrot H, Sarfatti M and Zamir D	1991	Mol Plant-Microbe Interact	4	489-492	Restriction fragment length polymorphism mapping of the Stemphylium resistance gene in tomato.
155	Resistance to virus PVY	p_R	Ry-adg, Ra-adg			https://doi.org/10.1007/s001220050836	Hämäläinen JH, Sorri VA, Watanabe KN, Gebhardt C, Valkonen JPT	1998	Theor Appl Genet	96	1036-1043	Molecular examination of a chromosome region that controls resistance to potato Y and A potyviruses in potato
156	Resistance to virus PVY	p_R	Ry-adg, ra			https://doi.org/10.1094/MPMI.2000.13.4.402	Hämäläinen JH, Kekarainen T, Gebhardt C, Watanabe KN, Valkonen JPT	2000	Mol Plant-Microbe Interact	13	402-412	Recessive and dominant genes interfere with the vascular transport of potato virus A in diploid potatoes.
157	Resistance to virus PVY	p_R	Ry-adg			https://doi.org/10.1007/s001220050399	Hämäläinen JH, Watanabe KN, Valkonen JPT, Arihara A, Plaisted RL, Pehu E, Miller L, Slack SA	1997	Theor Appl Genet	94	192-197	Mapping and marker-assisted selection for a gene for extreme resistance to potato virus Y.
158	Resistance to virus PVY	p_R	Ry-sto (XI)			https://doi.org/10.1007/s001220050400	Brigneti G, Garcia-Mas J, Baulcombe DC	1997	Theor Appl Genet	94	198-203	Molecular mapping of the potato virus Y resistance gene Ry-sto in potato
159	Resistance to nematode Meloidogyne	p_R	RMc1			https://doi.org/10.1007/BF00224560	Brown CR, Yang C-P, Mojtahedi H, Santo GS, Masuelli R	1996	Theor Appl Genet	92	572-576	RFLP analysis of resistance to Columbia root-knot nematode derived from Solanum bulbocastanum in a BC2 population.
160	Resistance to virus PVY	p_R	Ry-fsto			https://doi.org/10.1007/s11032-004-2736-3	Flis B, Hennig J, Strzelczyk-Żyta D, Gebhardt C, Marczewski W	2005	Mol Breeding	15	95-101	The Ry-fsto gene from Solanum stoloniferum for extreme resistant to Potato virus Y maps to potato chromosome XII and is diagnosed by PCR marker GP122718 in PVY resistant potato varieties.
161	Resistance to virus PVX	p_R	Rx			doi: 10.1105/tpc.11.5.781	Bendahmane A, Kanyuka K, Baulcombe DC	1999	Plant Cell	11	781-791	The Rx gene from potato controls separate virus resistance and cell death responses.
162	Resistance to nematode Globodera pallida, resistance to virus PVX	p_R	Gpa2, Rx1			https://doi.org/10.1046/j.1365-313x.2000.00814.x	Van der Vossen EAG, Rouppe van der Voort JNAM, Kanyuka K, Bendahmane A, Sandbrink H, Baulcombe DC, Bakker J, Stiekema WJ, Klein-Lankhorst RM	2000	Plant J	23	567-576	Homologues of a single resistance-gene cluster in potato confer resistance to distinct pathogens: a virus and a nematode.
163	Resistance to fungus Leveilulla	t_R	Lv			https://doi.org/10.1007/BF00226986	Chungwongse J, Bunn TB, Crossman C, Jiang J, Tanksley SD	1994	Theor Appl Genet	89	76-79	Chromosomal localization and molecular-marker tagging of the powdery mildew resistance gene (Lv) in tomato
164	Resistance to nematode Meloidogyne	t_R	Mi-3			https://doi.org/10.1007/BF00222973	Yaghoobi J, Kaloshian, Wen Y, Williamson VM	1995	Theor Appl Genet	91	457-464	Mapping a new nematode resistance locus in Lycopersicum peruvianum.
165						https://doi.org/10.1094/MPMI-18-1107	Pajerowska K, Parker JE, Gebhardt C	2005	Mol Plant-Microbe Interact	18	1107-1119	Potato Homologues of Arabidopsis thaliana Genes Functional in Defense Signaling – Identification, Genetic Mapping and Molecular Cloning
166	Resistance to insect whitefly	t_QRL	WR			https://doi.org/10.1038/hdy.1995.155	Maliepaard C, Bas N, van Heusden S, Kos J, Pet G, Verkerk R, Vrielink R, Zabel P, Lindhout P	1995	Heredity	75	425-433	Mapping of QTLs for glandular trichome densities and Trialeurodes vaporariorum (greenhouse whitefly) resistance in an F2 from Lycopersicon esculentum x Lycopersicon hirsutum f. glabratum.
167	Resistance to virus PVY	t_R	pot-1			https://doi.org/10.1007/s00438-005-0003-x	Ruffel S, Gallois JL, Lesage ML, Caranta C	2005	Mol Gen Genet	274	346-353	The recessive potyvirus resistance gene pot-1 is the tomato orthologue of the pepper pvr2-eIF4e gene.
168	Resistance to Phytophthora	p_R	Rpi-blb2			https://doi.org/10.1111/j.1365-313X.2005.02527.x	Van der Vossen EAG, Gros J, Sikkema A, Muskens M, Wouters D, Wolters P, Pereira A, Allefs S	2005	Plant J	44	208-222	The Rpi-blb2 gene from Solanum bulbocastanum is a Mi-1 gene homolog conferring broad-spectrum late blight resistance in potato
169	Resistance to nematode Globodera pallida	p_QRL	Gpa			https://doi.org/10.1094/MPMI-18-1186	Caromel B, Mugniéry D, Kerlan MC, Andrzejewski S, Palloix A, Ellissèche D, Rousselle-Bourgeois F, Lefebvre V	2005	Mol Plant-Microbe Interact	18	1186-1194	Resistance quantative trait loci originating from Solanum sparsipilum act independently on the sex-ratio of Globodera pallida and together for developing a necrotic reaction.
170	Resistance to nematode Meloidogyne	t_R	Mi-3			https://doi.org/10.1007/s00438-005-1149-2	Yaghoobi J, Yates JL, Williamson VM	2005	Mol Gen Genomics	274	60-69	Fine mapping of the nematode resistance gene Mi-3 in Solanum peruvianum and construction of a S. lycopersicum DNA contig spanning the locus
171	Resistance to nematode Meloidogyne	t_R	Mi-9			https://doi.org/10.1007/s00122-002-1106-y	Ammiraju J. Veremis X, Huang P, Roberts I, Kaloshian	2003	Theor Appl Genet	106	478-484	The heat-stable root-knot nematode resistance gene Mi-9 from Lycopersicon peruvianum is localized on the short arm of chromosome 6
172	Resistance to Phytophthora	t_QRL	tLBR			https://doi.org/10.1007/s00122-003-1469-8	Brouwer DJ, St. Clair DA	2004	Theor Appl Genet	108	628-638	Fine mapping of three quantitative trait loci for late blight resistance in tomato using near isogenic lines (NILs) and sub-NILs
173	Resistance to Phytophthora	p_QRL	pLBR			https://doi.org/10.1007/s00122-005-2053-1	Costanzo S, Simko I, Christ BJ, Haynes KG	2005	Theor Appl Genet	111	609-617	QTL analysis of late blight resistance in a diploid potato family of Solanum phureja x S. stenotomum
174	Resistance to Phytophthora	p_R	Rpi-ber			https://doi.org/10.1007/s00122-005-0171-4	Rauscher GM, Smart CD, Simko I, Bonierbale M, Mayton H, Greenland A, Fry WE	2006	Theor Appl Genet	112	674-687	Characterization and mapping of Rpi-ber, a novel potato late blight resistance gene from Solanum berthaultii.
175	Resistance to Phytophthora	p_R	Rpi-phu1			https://doi.org/10.1007/s00122-006-0336-9	Śliwka J, Jakuczun H, Lebecka R, Marczewski W, Gebhardt C, Zimnoch-Guzowska E	2006	Theor Appl Genet	113	685-695	The novel, major locus Rpi-phu1 for late blight resistance maps to potato chromosome IX and is not correlated with long vegetation period.
176						https://doi.org/10.1007/s00122-006-0248-8	Gebhardt C, Bellin D, Henselewski H, Lehmann W, Schwarzfischer J, Valkonen JPT	2006	Theor Appl Genet	112	1458-1464	Marker-assisted combination of major genes for pathogen resistance in potato.
177	Resistance to virus PVM	p_R	Gm, Rm			https://doi.org/10.1007/s00122-006-0224-3	Marczewski W, Strzelczyk-Żyta D, Hennig J, Witek K, Gebhardt C	2006	Theor Appl Genet	112	1232-1238	Potato chromosomes IX and XI carry genes for resistance to potato virus M.
178	Resistance to Phytophthora	p_QRL	pLBR			https://doi.org/10.1007/s00122-005-0053-9	Villamon FG, Spooner DM, Orillo M, Mihovilovitch E, Perez W, Bonierbale M	2005	Theor Appl Genet	111	1201-1214	Late blight resistance linkages in a novel cross of the wild potato species Solanum paucissectum (series Piurana)
179	Resistance to virus PVY	p_R	Ry-sto			https://doi.org/10.1007/s00122-005-0010-7	Song Y-S, Hepting L, Schweizer G, Hartl L, Wenzel G, Schwarzfischer A	2005	Theor Appl Genet	111	879-887	Mapping of extreme resistance to PVY (Rysto) on chromosome XII using anther-culture-derived primary dihaploid potato lines
180						https://doi.org/10.1186/1471-2164-8-112	Ballvora A, Jöcker A, Viehöver P, Ishihara H, Paal J, Meksem K, Bruggmann R, Schoof H, Weisshaar B, Gebhardt C	2007	BMC Genomics	8	112	Comparative sequence analysis of Solanum and Arabidopsis in a hot spot for pathogen resistance on potato chromosome V reveals a patchwork of conserved and rapidly evolving genome segments
181	Resistance to Phytophthora, maturity	p_QRL	pLBR	p_QTL	pM	https://doi.org/10.1007/s00122-007-0546-9	Śliwka J, Jakuczun H, Lebecka R, Marczewski W, Gebhardt C, Zimnoch-Guzowska E	2007	Theor Appl Genet	115	101-112	Tagging QTLs for late blight resistance and plant maturity from diploid wild relatives in a cultivated potato (Solanum tuberosum) background.
182						doi: 10.1093/genetics/137.1.303	Van Eck H J, Jacobs J M, Stam P, Ton J, Stiekema WJ, Jacobsen E	1994	Genetics	137	303-309	Multiple alleles for tuber shape in diploid potato detected by qualitative and quantitative genetic analysis using RFLPs
183	Resistance to nematode Meloidogyne	p_R	MfaXIIspl			https://doi.org/10.1007/s00122-005-0173-2	Bakari KA, Kerlan M-C, Caromel B, Dantec J-P, Fouville D, Manzanares-Dauleux M, Ellissèche D, Mugniéry D	2005	Theor Appl Genet	112	699-707	A major gene mapped on chromosome XII is the main factor of quantitatively inherited resistance to Meloidogyne fallax in Solanum sparsipilum.
184	Resistance to Phytophthora	p_R	Rpi-blb3			https://doi.org/10.1094/MPMI-18-0722	Park T-H, Gros J, Sikkema A, Vleeshouwers GAA, Muskens M, Allefs S, Jacobsen E, Visser RGF, van der Vossen EAG	2005	Mol Plant-Microbe Interact	18	722-729	The late blight resistance locus Rpi-blb3 from Solanum bulbocastanum belongs to a major late blight R gene cluster on chromosome 4 of potato
185						https://doi.org/10.1007/s00122-005-2028-2	Feingold S, Lloyd J, Norero N, Bonierbale M, Lorenzen J	2005	Theor Appl Genet	111	456-466	Mapping and characterization of new EST-derived microsatellites for potato (Solanum tuberosum L.).
186	Resistance to nematode Globodera pallida	p_QRL	Gpa4			https://doi.org/10.1023/B:MOLB.0000037999.13581.9c	Bryan GJ, McLean K, Pande B, Purvis A, Hackett CA, Bradshaw JE, Waugh R	2004	Mol Breeding	14	105-116	Genetical dissection of H3-mediated polygenic PCN resistance in a heterozygous autotetraploid potato population
187	Resistance to nematode Globodera rostochiensis	p_R	H1			https://doi.org/10.1007/s00122-004-1606-z	Bakker E, Achenbach U, Bakker J, van Vliet J, Peleman J, Segers B, van der Heijden S, van der Linde P, Graveland R, Hutten R, van Eck H, Coppoolse E, van der Vossen E, Bakker J, Goverse A	2004	Theor Appl Genet	109	146-152	A high-resolution map of the H1 locus harbouring resistance to the potato cyst nematode Globodera rostochiensis.
188	Resistance to Phytophthora	p_R	R10, R11			https://doi.org/10.1007/s00122-005-0179-9	Bradshaw JE, Bryan GJ, Lees AK, McLean K, Solomon-Blackburn RM	2006	Theor Appl Genet	112	744-751	Mapping the R10 and R11 genes for resistance to late blight (Phytophthora infestans) present in the potato (Solanum tuberosum) R-gene differentials of Black
189	Resistance to Phytophthora	p_QRL	pLBR			https://doi.org/10.1007/s00122-006-0353-8	Bradshaw JE, Hackett CA, Lowe R, McLean K, Stewart HE, Tierney I, Marco D. R. Vilaro MDR, Bryan GJ	2006	Theor Appl Genet	113	943-951	Detection of a quantitative trait locus for both foliage and tuber resistance to late blight [Phytophthora infestans (Mont.) de Bary] on chromosome 4 of a dihaploid potato clone (Solanum tuberosum subsp. tuberosum)
190	Resistance to Phytophthora	p_R	Rpi-blb1			https://doi.org/10.1007/s00122-008-0725-3	Wang M, Allefs S, van den Berg RG, Vleeshouwers VGAA, van der Vossen EAG, Vosman B	2008	Theor Appl Genet	116	933-943	Allele mining in Solanum: conserved homologues of Rpi-blb1 are identified in Solanum stoloniferum
191						doi: 10.1093/genetics/120.4.1095	Bonierbale MW, Plaisted RL, Tanksley SD	1988	Genetics	120	1095-1103	RFLP maps based on a common set of clones reveal modes of chromosomal evolution in potato and tomato
192						https://doi.org/10.1007/BF00222091	Eck HJ, Jacobs JME, Dijk J, Stiekema WJ, Jacobsen E	1993	Theor Appl Genet	86	295-300	Identification and mapping of three flower colour loci of potato (S. tuberosum L.) by RFLP analysis
193						https://doi.org/10.1038/hdy.1994.189	Eck HJ, Jacobs JME, Van den Berg PMMM, Stiekema WJ, Jacobsen E	1994	Heredity	73	410-421	The inheritance of anthocyanin pigmentation in potato (Solanum tuberosum L) and mapping of tuber skin colour loci using RFLPs
194						https://doi.org/10.1007/s00122-003-1455-1	De Jong W, Eannetta NT, De Jong DM, Bodis M	2004	Theor Appl Genet	108	423-432	Candidate gene analysis of anthocyanin pigmentation loci in the Solanaceae
195						https://doi.org/10.1007/s00122-003-1395-9	De Jong WS, De Jong DM, De Jong H, Kalazich J, Bodis M	2003	Theor Appl Genet	107	1375-1383	An allele of dihydroflavonol 4-reductase associated with the ability to produce red anthocyanin pigments in potato (Solanum tuberosum L.)
196	Yield, sugars			p_QTL	pTY, pTSC	https://doi.org/10.1007/s00122-008-0746-y	Li L, Paulo M-J, Strahwald J, Lübeck J, Hofferbert H-R, Tacke E, Junghans H, Wunder J, Draffehn A, van Eeuwijk F, Gebhardt C	2008	Theor Appl Genet	116	1167-1181	Natural DNA variation at candidate loci is associated with potato chip color, tuber starch content, yield and starch yield.
197	Yield, sugars			t_QTL	tFY, tSS	DOI: 10.1093/jxb/erh207	Causse M, Duffe P, Gomez MC, Buret M, Damidaux R, Zamir D, Gur A, Chevalier C, Lemaire-Chamley M, Rothan C	2004	J Exp Botany	55	1671-1685	A genetic map of candidate genes and QTLs involved in tomato fruit size and composition.
198	Resistance to Phytophthora	p_QRL	pLBR			https://doi.org/10.1007/BF02871596	Madsen D, Sørensen K, Madsen M, Kirk H	2006	Am J Pot Res	83	349-355	A CAPS marker derived from tomato 12-oxophytodienoate reductase shows putative co-segregation with potato late blight resistance.
199	Resistance to virus PVY	p_R	Ry-chc			https://doi.org/10.1007/s10681-006-9090-y	Sato M, Nishikawa K, Komura K, Hosaka K	2006	Euphytica	149	367-372	Potato Virus Y Resistance Gene, Rychc, Mapped to the Distal End of Potato Chromosome 9
200	Resistance to fungus Fusarium	t_R	I-3			https://doi.org/10.1007/s00122-008-0876-2	Lim G, Wang GP, Hemming M, McGrath D, Jones D	2008	Theor Appl Genet	118	57-75	High resolution genetic and physical mapping of the I-3 region of tomato chromosome 7 reveals almost continuous microsynteny with grape chromosome 12 but interspersed microsynteny with duplications on Arabidopsis chromosomes 1 , 2 and 3
201	Resistance to fungus Fusarium	me_QRL	Fm1 (Rfo-sa1)			https://doi.org/10.1007/s00122-015-2632-8	Miyatake K, Saito T, Negoro S, Yamaguchi H, nunome T, Ohyama A, Fukuoka H	2016	Theor Appl Genet	129	357–367	Detailed mapping of a resistance locus against Fusarium wilt in cultivated eggplant (Solanum melongena).
202	Yield			t_QTL	tFY *	DOI: 10.1126/science.289.5476.85	Frary A, Nesbitt TC, Grandillo S, Knaap E, Cong B, Liu J, Meller J, Elber R, Alpert KB, Tanksley SD	2000	Science	289	85-88	fw2.2: a quantitative trait locus key to the evolution of tomato fruit size.
203	Resistance to nematode Globodera pallida	p_R	GpaXI-tar			https://doi.org/10.1007/s00122-009-1149-4	Adilla Tan MY, Park T-H, Alles R, Hutten R, Visser R, van Eck H	2009	Theor Appl Genet	119	1477-1487	GpaXI-tar originating from Solanum tarijense is a major resistance locus to Globodera pallida and is localised on chromosome 11 of potato
204						https://doi.org/10.1007/s00122-009-1158-3	Jung CS, Griffiths HM, De Jong DM, Cheng S, Bodis M, Kim TS, De Jong WS	2009	Theor Appl Genet	120	45-57	The potato developer (D) locus encodes an R2R3 MYB transcription factor that regulates expression of multiple anthocyanin structural genes in tuber skin
205						https://doi.org/10.1007/s00122-009-1100-8	Zhang Y, Cheng S, De Jong DM, Griffiths HM, Halitschke R, De Jong WS	2009	Theor Appl Genet	119	931-937	The potato R locus codes for dihydroflavonol 4-reductase
206	Resistance to Phytophthora	p_QRL	pLBR			https://doi.org/10.1007/s00122-009-1081-7	Danan S, Chauvin J-E, Caromel B, Moal J-D, Pellé R, Lefebvre V	2009	Theor Appl Genet	119	705-719	Major-effect QTLs for stem and foliage resistance to late blight in the wild potato relatives Solanum sparsipilum and S. spegazzinii are mapped to chromosome X
207	Resistance to Phytophthora	p_R	Rpi-abpt			https://doi.org/10.1007/s11032-005-1925-z	Park T-H, Vleeshouwers GAA, Hutten RCB, van Eck HJ, van der Vossen E, Jacobsen E, Visser RGF	2005	Mol Breeding	16	33-43	High-resolution mapping and analysis of the resistance locus Rpi-abpt against Phytophthora infestans in potato
208	Resistance to Phytophthora	p_R	Rpi-vnt1.1			http://dx.doi.org/10.1094/MPMI-22-5-0589	Foster SJ, Park T-H, Pel M, Brigneti G, Sliwka J, Jagger L, van der Vossen E, Jones JDG	2009	Mol Plant-Microbe Interact	22	589-600	Rpi-vnt1.1, a Tm-2 homolog from Solanum venturii, confers resistance to potato late blight
209	Resistance to Phytophthora	p_R	Rpi-vnt1.1, Rpi-vnt1.3			https://doi.org/10.1094/MPMI-22-5-0601	Pel MA, Foster S, Park T-H, Rietman H, van Arkel G, Jones JDG, Van Eck HJ, Jacobsen E, Visser RGF, Van der Vossen EAG	2009	Mol Plant-Microbe Interact	22	601-615	Mapping and cloning of late blight resistance genes from Solanum venturii using an interspecific candidate gene approach
210	Yield, sugars			t_QTL	tFW, tSS	https://doi.org/10.1038/ng.3117	Lin, T., Zhu, G., Zhang, J. et al.	2014	Nat. Genet	46	1220–1226	Genomic analyses provide insights into the history of tomato breeding.
211	Resistance to virus TYLCV	pe_R	pepy-1			https://doi.org/10.1007/s00122-021-03870-7	Koeda S, Onouchi M, Mori N, Pohan NS, Nagano AJ, Kesumawati E	2021	Theor Appl Genet	134	2947–2964	A recessive gene pepy‑1 encoding Pelota confers resistance to begomovirus isolates of PepYLCIV and PepYLCAV in Capsicum annuum
212						https://doi.org/10.1038/nature11119	The Tomato Genome Sequence Consortium	2012	Nature	485	635-641	The tomato genome sequence provides insights into fleshy fruit evolution.
213	Resistance to fungus Synchytrium	p_QRL	RSe			https://doi.org/10.1007/s00122-011-1666-9	Ballvora A, Flath K, Lübeck J, Strahwald J, Tacke E,Hofferbert H-R, Gebhardt C	2011	Theor Appl Genet	123	1281-1292	Multiple alleles for resistance and susceptibility modulate the defense response in the interaction of tetraploid potato (Solanum tuberosum) with Synchytrium endobioticum pathotypes 1, 2, 6 and 18
214	Resistance to virus TMV	pe_R	L			https://doi.org/10.1094/MPMI-06-10-0127	Tomita R, Sekine K-T, Mizumoto H, Sakamoto M, Murai J, Kiba A, Hikichi J, Suzuki K, Kobayashi K	2011	Mol Plant-Microbe Interact	24	108-117	Genetic Basis for the Hierarchical Interaction Between Tobamovirus spp. and L Resistance Gene Alleles from Different Pepper Species
215	Resistance to Phytophthora	p_R	Rpi-mcd1			https://doi.org/10.1094/MPMI-21-7-0909	Tan MYA, Hutten R, Celis C, Park T-H, Niks RE, Visser R, van Eck H	2008	Mol Plant-Microbe Interact	21	909-918	The Rpi-mcd1 locus from Solanum microdontum involved in resistance to Phytophthora infestans, causing a delay in infection, maps on potato chromosome 4 in a cluster of NBS-LRR genes
216	Resistance to Phytophthora	p_R	R8			https://doi.org/10.1007/s00122-011-1670-0	Jo K-R, Arens M, Kim T-Y, Jongsma M, Visser R, Jacobsen E, Vossen J	2011	Theor Appl Genet	123	1331-1340	Mapping of the S. demissum late blight resistance gene R8 to a new locus on chromosome IX
217	Resistance to fungus Synchytrium	p_QRL	RSe			https://doi.org/10.1007/s13353-013-0141-5	Groth J, Song J, Kellermann A, Schwarzfischer A	2013	J Appl Genet	54	169-178	Molecular characterisation of resistance against potato wart races 1, 2, 6 and 18 in a tetraploid population of potato (Solanum tuberosum subsp.tuberosum)
218						https://doi.org/10.1007/s11032-008-9240-0	Ghislain M, Nunez J, del Rosario-Herrara M, Pignataro J, Guzman F, Bonierbale M, Spooner DM	2009	Mol Breed	23	377-388	Robust and highly informative microsatellite-based genetic identity kit for potato
219	Yield, maturity			p_QTL	pTY, pM	https://doi.org/10.1186/1471-2164-12-7	Urbany C, Stich B, Schmidt L, Simon L, Berding H, Junghans H, Niehoff K-H, Braun A, Tacke E, Hofferbert H-R, Lübeck J, Strahwald J, Gebhardt C	2011	BMC Genomics	12	7	Association genetics in Solanum tuberosum provides new insights into potato tuber bruising and enzymatic tissue discoloration.
220	Resistance to virus PVY	p_R	Y-1			https://doi.org/10.1094/MPMI.2002.15.7.717	Vidal S, Cabrera H, Andersson RA, Fredriksson A, Valkonen JPT	2002	Mol Plant-Microbe Interact	15	717-727	Potato gene Y-1 is an N gene homolog that confers cell death upon infection with potato virus Y
221	Resistance to Phytophthora	p_R	Rpi-mch1			https://doi.org/10.1007/s00122-011-1715-4	Śliwka J,Jakuczun H, Chmielarz M, Hara-Skrzypiec A, Tomczyńska I, Kilian A, Zimnoch-Guzowska E	2012	Theor Appl Genet	124	397-406	A resistance gene against potato late blight originating from Solanum × michoacanum maps to potato chromosome VII
222	Resistance to Phytophthora	p_R	Rpi-rzc1			https://doi.org/10.1186/1471-2156-13-11	Śliwka J,Jakuczun H, Chmielarz M, Hara-Skrzypiec A, Tomczyńska I, Kilian A, Zimnoch-Guzowska E	2012	BMC Genetics	13	11	Late blight resistance gene from Solanum ruiz-ceballosii is located on potato chromosome X and linked to violet flower colour
223	Resistance to Phytophthora	p_QRL	pLBR			https://doi.org/10.1111/j.1439-0523.2006.01232.x	Simko I, Costanzo S, Ramanjulu V,Christ BJ, Haynes KG	2006	Plant Breeding	125	385-389	Mapping polygenes for tuber resistance to late blight in a diploid Solanum phureja × S. stenotomum hybrid population
224	Resistance to Phytophthora	t_R	Ph-3			https://doi.org/10.1007/s00122-014-2303-1	Zhang C, Liu L, Wang X, Vossen J, Li G, Li T, Zheng Z, Gao J, Guo Y, Visser RGF, Li J, Bai Y, Du Y	2014	Theor Appl Genet	127	1353-1364	The Ph‑3 gene from Solanum pimpinellifolium encodes CC‑NBS‑LRR protein conferring resistance to Phytophthora infestans
225	Resistance to Phytophthora, maturity	p_QRL	pLBR	p_QTL	pM	https://doi.org/10.1534/genetics.104.030056	Bradshaw JE, Pande B, Bryan GJ, Hackett CA, McLean K, Stewart HE, Waugh R	2004	Genetics	168	983-995	Interval mapping of quantitative trait loci for resistance to late blight [Phytophthora infestans (Mont.) de Bary], height and maturity in a tetraploid population of potato (Solanum tuberosum subsp. tuberosum).
226	Resistance to Phytophthora	p_QRL	pLBR			https://doi.org/10.1007/s00122-012-1791-0	Li J, Lindqvist-Kreuze H, Tian Z, Liu J, Song B, Landeo J, Portal L, Gastelo M, Frisancho J, Sanchez L, Meijer D, Xie C, Bonierbale M	2012	Theor Appl Genet	124	1339-1350	Conditional QTL underlying resistance to late blight in a diploid potato population
227	Resistance to Phytophthora	p_QRL	pLBR			https://doi.org/10.1007/s00122-010-1410-x	Rauscher GM, Simko I, Mayton H, Bonierbale M, Smart CD, Grünwald NJ, Greenland A, Fry WE	2010	Theor Appl Genet	121	1553-1567	Quantitative resistance to late blight from Solanum berthaultii cosegregates with Rpi-ber: insights in stability through isolates and environment
228	Resistance to virus PVY	p_R	Nc-spl			https://doi.org/10.1094/MPMI-10-10-0246	Moury B, Caromel B, Johansen E, Simon V, Chauvin L, Jacquot E, Kerlan C, Lefebvre V	2011	Mol Plant-Microbe Interact	24	787-797	The helper component proteinase cistron of potato virus Y induces hypersensitivity and resistance in potato genotypes carrying dominant resistance genes on chromosome IV
229	Resistance to virus PVY	p_R	Ry-sto			https://doi.org/10.1007/s12230-008-9012-8	Song Y-S, Schwarzfischer A	2008	Am J Potato Res	85	159-175	Development of STS markers for selection of extreme resistance (Rysto) to PVY and maternal pedigree analysis of extremely resistant cultivars
230	Resistance to Phytophthora	p_QRL	pLBR			https://doi.org/10.1007/s00122-013-2248-9	Tomczyńska I, Stefańczyk E, Chmielarz M, Karasiewicz B, Kamiński P, Jones JDG, Lees AK, Śliwka J	2014	Theor Appl Genet	127	647-657	A locus conferring effective late blight resistance in potato cultivar Sárpo Mira maps to chromosome XI
231	Resistance to virus PVY	p_R	Ny-Smira			https://doi.org/10.1007/s11032-014-0050-2	Tomczyńska I, Jupe F, Hein I, Śliwka J	2014	Mol Breed	34	471-480	Hypersensitive response to Potato virus Y in potato cultivar Sárpo Mira is conferred by the Ny-Smira gene located on the long arm of chromosome IX.
232	Resistance to virus PVY	p_R	Ny-1, Ny-2			https://doi.org/10.1007/s11032-014-0024-4	Szajko K, Strzelczyk-Zyta D, Marczewski W	2014	Mol Breed	34	267-271	Ny-1 and Ny-2 genes conferring hypersensitive response to potato virus Y (PVY) in cultivated potatoes: mapping and marker-assisted selection validation for PVY resistance in potato breeding
233	Resistance to virus PVY	p_R	Ny-1			https://doi.org/10.1007/s00122-007-0667-1	Szajko K, Chrzanowska M, Witek K, Strzelczyk-Zyta D, Zagorska H, Gebhardt C, Hennig J, Marczewski W	2008	Theor Appl Genet	116	297-303	The novel gene Ny-1 on potato chromosome IX confers hypersensitive resistance to Potato virus Y and is an alternative to Ry genes in potato breeding for PVY resistance
234	Resistance to virus PVY	p_R	Ry-adg, Ry-sto(XI)			https://doi.org/10.1007/BF02871590	Rizza MD, Vilaró F, Torres D, Maeso, D	2006	Am J Potato Res	83	297-304	Detection of PVY extreme resistance genes in potato germplasm from the uruguayan breeding program
235	Yield, sugars			p_QTL	pTY, pTSC	DOI: 10.1534/g3.114.012377	Schreiber L, Nader-Nieto AC, Schönhals EM, Walkemeier B, Gebhardt C	2014	G3: Genes|Genomes|Genetics	4	1797-1811	SNPs in genes functional in starch-sugar interconversion associate with natural variation of tuber starch and sugar content of potato (Solanum tuberosum L).
236	Yield			t_QTL	tFW	https://doi.org/10.1371/journal.pone.0137139	Sacco A, Ruggieri V, Parisi M, Festa G, Rigano MM, Picarella ME, Mazzucato A, Barone A	2015	Plos ONE	10	e0137139	Exploring a tomato landraces collection for fruit-related traits by the aid of a high-throughput genomic platform.
237	Yield, sugars			t_QTL	tFY, tSS	https://doi.org/10.1007/s00122-012-2002-8	Xu J, Ranc N, Muños S, Rolland S, Bouchet JP, Brunel D, Causse M	2013	Theor Appl Genet	126	567–581	Phenotypic diversity and association mapping for fruit quality traits in cultivated tomato and related species.
238						https://doi.org/10.1038/nature10431	Navarro C, Abelenda JA, Cruz-Oro E, Cuellar CA, Tamaki, S, Silva J, Shimamoto K, Prat S	2011	Nature	478	119-122	Control of flowering and storage organ formation in potato by FLOWERING LOCUS T
239	Yield			p_QTL	pTY, pTW	https://doi.org/10.1007/BF00838564	Bonierbale MW, Plaisted RL, Tanksley SD	1993	Theor Appl Genet	86	481-491	A test of the maximum heterozygosity hypothesis using molecular markers in tetraploid potatoes.
240	Resistance to Phytophthora	p_QRL	pLBR			https://doi.org/10.1111/j.1365-3040.2010.02213.x	Odeny DA, Stich B, Gebhardt C	2010	Plant Cell Env	33	2149-2161	Physical organization of mixed protease inhibitor gene clusters, coordinated expression and association with resistance to late blight at the StKI locus on potato chromosome III
241	Resistance to Phytophthora	p_R	R9a			https://doi.org/10.1007/s00122-015-2480-6	Jo, K‑R, Visser RGF, Jacobsen E, Vossen JH	2015	Theor Appl Genet	128	931–941	Characterisation of the late blight resistance in potato differential MaR9 reveals a qualitative resistance gene, R9a, residing in a cluster of Tm-22 homologs on chromosome IX.
242	Yield, sugars			t_QTL	tFY, tFW, tSS	DOI: 10.1093/genetics/141.3.1147	Eshed Y, Zamir D	1995	Genetics	141	1147-1162	An introgression line population of Lycopersicon pennellii in the cultivated tomato enables the identification and fine mapping of yield-associated QTL.
243						https://doi.org/10.1023/A:1018380725160	Hosaka K, Hanneman RE jr	1998	Euphytica	103	265-271	Genetics of self-compatibility in a self-incompatible wild diploid potato species Solanum chacoense. 2. Localization of an S locus inhibitor (Sli) gene on the potato genome using DNA markers.
244						https://doi.org/10.1007/s10681-011-0381-6	Mori K, Sakamoto Y, Mukojima N, Tamiya S, Nakao T, Ishii T, Hosaka K	2011	Euphytica	180	347–355	Development of a multiplex PCR method for simultaneous detection of diagnostic DNA markers of five disease and pest resistance genes in potato.
245	Yield			t_QTL	tFY	https://doi.org/10.1038/335721a0	Paterson AH, Lander ES, Hewitt JD, Peterson S, Lincoln SE, Tanksley SD	1988	Nature	335	721-726	Resolution of quantitative traits into Mendelian factors by using a complete linkage map of restriction fragment length polymorphisms.
246	Resistance to fungus Alternaria	t_QRL	EBR			https://doi.org/10.1007/s00122-002-0870-z	Foolad MR, Zhang LP, Khan AA, Nino-Liu D, Lin GY	2002	Theor Appl Genet	104	945–958	Identification of QTLs for early blight (Alternaria solani) resistance in tomato using backcross populations of a Lycopersicon esculentum x L. hirsutum cross.
247	Resistance to fungus Synchytrium	p_QRL	RSe			https://doi.org/10.1186/s12863-015-0195-y	Obidiegwu JE, Sanetomo R, Flath K, Tacke E, Hofferbert H-R, Hofmann A, Walkemeier B, Gebhardt C	2015	BMC Genetics	16	38	Genomic architecture of potato resistance to Synchytrium endobioticum disentangled using SSR markers and the 8.3k SolCAP SNP genotyping array
248	Resistance to fungus Synchytrium	p_R	Sen1-4			https://doi.org/10.1007/s00122-005-0125-x	Brugmans B, Hutten R, Rookmaker A, Visser R, van Eck H	2006	Theor Appl Genet	112	269–277	Exploitation of a marker dense linkage map of potato for positional cloning of a wart disease resistance gene
249	Resistance to virus PVY	p_R	Ry-fsto, Ns			https://doi.org/10.1007/s11032-006-9021-6	Witek K, Strzelczyk-Zyta D, Hennig J, Marczewski W	2006	Mol Breed	18	273-275	A multiplex PCR approach to simultaneously genotype potato towards the resistance alleles Ry-fsto and Ns
250	Resistance to virus PVY	p_R	Ra-adg			https://doi.org/10.1139/g99-092	Kasai K, Morikawa Y, Sorri VA, Valkonen JPT, Gebhardt C, Watanabe KN	2000	Genome	43	1-8	Development of SCAR markers to the PVY resistance gene Ry-adg based on a common feature of plant disease resistance genes
251	Resistance to virus PVY	p_R	Ry-sto			https://doi.org/10.1270/jsbbs.58.309	Cernak I, Decsi K, Nagy S, Wolf I, Polgar Z, Gulyas G, Hirata Y, Taller J	2008	Breeding Science	58	309-314	Development of a locus-specific marker and localization of the Rysto gene based on linkage to a catalase gene on chromosome XII in the tetraploid potato genome
252	Resistance to Phytophthora	p_QRL	pLBR			https://doi.org/10.2135/cropsci2005.0112	Colton LM, Groza HI, Wielgus SM, Jiang J	2006	Crop Science	46	589-594	Marker-assisted selection for the broad-spectrum potato late blight resistance conferred by gene derived from a wild potato species
253	Yield			p_QTL	pTY	https://doi.org/10.1186/s12864-017-3979-9	Schönhals E, Ding J, Ritter E, Paulo MJ, Cara N, Tacke E, Hofferbert H-R, Lübeck J, Strahwald J, Gebhardt C	2017	BMC Genomics	18	642	Physical mapping of QTL for tuber yield, starch content and starch yield in tetraploid potato (Solanum tuberosum L.) by means of genome wide genotyping by sequencing and the 8.3 K SolCAP SNP array.
254	Resistance to Phytophthora	p_R	Rpi-ber1, Rpi-ber2			https://doi.org/10.1007/s10681-008-9784-4	Park T-H, Foster S, Brigneti G, Jones JDG	2009	Euphytica	165	269-278	Two distinct potato late blight resistance genes from Solanum berthaultii are located on chromosome 10
255	Resistance to Phytophthora	p_R	Rpi-snk, Rpi-ver, Rpi-cap			https://doi.org/10.1007/s00122-009-1199-7	Jacobs MMJ, Vosman B, Vleeshouwers VGAA, Visser RGF, Henken B, van den Berg RG	2010	Theor Appl Genet	120	785–796	A novel approach to locate Phytophthora infestans resistance genes on the potato genetic map
256	Resistance to nematode Meloidogyne	p_R	RMc1			https://doi.org/10.1023/A:1003587807399	van der Voort Rouppe JNAM, Janssen GJW, Overmars H, van Zandvoort PM, van Norel A, Scholten OE, Janssen R, Bakker J	1999	Euphytica	106	187-195	Development of a PCR-based selection assay for root-knot nematode resistance ( Rmc1) by a comparative analysis of the Solanum bulbocastanum and S. tuberosum genome
257	Resistance to nematode Meloidogyne	p_R	RMc1			https://doi.org/10.2135/cropsci2007.01.0003	Zhang L-H, Mojtahedi H, Kuang H, Baker B, Brown CR	2007	Crop Science	47	2021-2026	Marker-assisted selection of Columbia root-knot nematode resistance introgressed from Solanum bulbocastanum
258						https://doi.org/10.1111/pbr.12062	Lopez-Pardo R, Barandall L, Ritter E, Ruiz de Galarreta JI	2013	Plant Breeding	132	246-251	Validation of molecular markers for pathogen resistance in potato
259	Resistance to nematode Globodera rostochiensis, pallida	p_R	Gro, Gpa			https://doi.org/10.1007/s12230-011-9189-0	Milczarek D, Flis B, Przetakiewicz A	2011	Am J Potato Res	88	245-255	Suitability of molecular markers for selection of potatoes resistant to Globodera spp.
260	Resistance to nematode Globodera pallida	p_QRL	Gpa			https://doi.org/10.1007/s00122-009-1185-0	Moloney C, Griffin D, Jones PW, Bryan GJ	2010	Theor Appl Genet	120	679-689	Development of diagnostic markers for use in breeding potatoes resistant to Globodera pallida pathotype Pa2/3 using germplasm derived from Solanum tuberosum ssp. andigena CPC 2802
261	Resistance to Phytophthora	t_QRL	tLBR			https://doi.org/10.1371/journal.pone.0189951	Arafa RA, Rakha TM, Soliman NEK, Moussa OM, Kamel SM, Shirasawa K	2017	PlosONE	12	e0189951	Rapid identification of candidate genes for resistance to tomato late blight disease using next-generation sequencing technologies
262	Resistance to fungus Alternaria	t_QRL	EBR			https://doi.org/10.1023/A:1025434319940	Zhang LP, Lin GY, Niño-Liu D, Foolad MR	2003	Mol Breed	12	3-19	Mapping QTLs conferring early blight (Alternaria solani) resistance in a Lycopersicon esculentum × L. hirsutum cross by selective genotyping
263	Resistance to fungus Fusarium	t_R	I, I2, I3, I4, I5, I6			https://doi.org/10.1007/s004380100509	Sela-Burlaage MB, Budai-Hadrian O, Pan Q, Carmel-Goren L, Vunsch R, Zamir D, Fluhr R	2001	Mol Genet Genomics	265	1104-1111	Genome-wide dissection of Fusarium resistance in tomato reveals multiple complex loci
264	Yield, sugars			t_QTL	tFY, tSS	https://doi.org/10.1007/s00122-015-2563-4	Capel C, Fernández del Carmen A, Alba JM, Lima-Silva V, Hernández-Gras F, Salinas M, Boronat A, Angosto T, Botella MA, Fernández-Muñoz R, Granell A, Capel J, Lozano R.	2015	Theor Appl Genet	128	2019-2035	Wide-genome QTL mapping of fruit quality traits in a tomato RIL population derived from the wild-relative species Solanum pimpinellifolium L.
265	Resistance to Phytophthora	t_QRL	tLBR			https://doi.org/10.1094/PDIS-91-8-1045	Smart CD, Tanksley SD, Mayton H, Fry WE	2007	Plant Disease	91	1045-1049	Resistance to Phytophthora infestans in Lycopersicon pennellii
266	Resistance to fungus Cladosporium	t_R	Cf-ECP2			https://doi.org/10.1007/s004380051148	Haanstra JPW, Lauge R, Meijer-Dekens F, Bonnema FG, de Wit PJGM, Lindhout P	2000	Mol Gen Genet	262	839-845	The Cf-ECP2 gene is linked to, but not part of, the Cf-4 /Cf-9 cluster on the short arm of chromosome 1 in tomato
267	Resistance to fungus Oidium	t_R	Ol-1			https://doi.org/10.1007/s001220051562	Huang CC, Cui YY, Weng CR, Zabel P, Lindhout P	2000	Theor Appl Genet	101	918–924	Development of diagnostic PCR markers closely linked to the tomato powdery mildew resistance gene Ol-1 on chromosome 6 of tomato
268	Resistance to bacterium Streptomyces	p_QRL	CSR			https://doi.org/10.1007/s11540-019-09437-w	Yuan J, Bizimungu B, De Koeyer D, Rosyara U, Wen Z, Lagüe M	2020	Potato Research	63	253-266	Genome-wide association study of resistance to potato common scab.
269	Resistance to fungus Oidium	t_QRL	Ol-qtl			https://doi.org/10.1094/MPMI.2003.16.2.169	Bai Y, Huang C-C, van der Hulst R, Meijer-Dekens F, Bonnema G, Lindhout P	2003	Mol Plant-Microbe Interact	16	169–176	QTLs for tomato powdery mildew resistance (Oidium lycopersici) in Lycopersicon parviflorum G1.1601 co-localize with two qualitative powdery mildew resistance genes
270	Resistance to fungus Oidium	t_QRL	Ol-qtl			10.22092/spij.2017.110984	Azizinia Sh, Zeynali H, Zali Abas A, Abd Mishani S.	2009	Seed Plant Improv	25	635-649	QTL mapping of tomato powdery mildew (Oidium neolycopersici L. Kiss) resistance
271	Resistance to bacterium Clavibacter	t_QRL	Cm			https://doi.org/10.1007/BF00221988	Sandbrink JM, van Ooijen JW, Purimahua CC, Vrielink M, Verkerk R, Zabel P, Lindhout P	1995	Theor Appl Genet	90	444-450	Localization of genes for bacterial canker resistance in Lycopersicon peruvianum using RFLPs.
272	Resistance to bacterium Clavibacter	t_QRL	Cm			https://doi.org/10.1094/PHYTO.2002.92.5.504	Kabelka E, Franchino B, Francis DM	2002	Phytopathology	92	504-510	Two loci from Lycopersicon hirsutum LA407 confer resistance to strains of Clavibacter michiganensis subsp. Michiganensis.
273	Resistance to bacterium Clavibacter	t_QRL	Cm			https://doi.org/10.1007/s00122-003-1531-6	Coaker GL, Francis DM	2004	Theor Appl Genet	108	1047–1055.	Mapping, genetic effects, and epistatic interaction of two bacterial canker resistance QTLs from Lycopersicon hirsutum.
274	Resistance to bacterium Xanthomonas	t_R	Rx-4			https://doi.org/10.1094/PHYTO-99-9-1037	Robbins MD, Darrigues A, Sim S-C, Masud MAT, Francis DM	2009	Phytopathology	99	1037-1044	Characterization of hypersensitive resistance to bacterial spot race T3 (Xanthomonas perforans) from tomato accession PI 128216
275	Resistance to bacterium Xanthomonas	t_R	Xv3			https://doi.org/10.1094/PHYTO-12-10-0345	Wang H, Hutton SF, Robbins MD, Sim S-C, Scott JW, Yang W, Jones JB, Francis DM	2011	Phytopathology	101	1217-1223	Molecular mapping of hypersensitive resistance from tomato ‘Hawaii 7981’ to Xanthomonas perforans race T3.
276	Yield, sugars			t_QTL	tFW, tSS	https://doi.org/10.1186/s12870-021-03271-4	Tripodi P, Soler S, Campanelli G, Díez MJ, Esposito S, Sestili S, Figàs MR, Leteo F, Casanova C, Platani C, Soler E, Bertone A, Pereira-Dias L, Palma D, Burguet R, Pepe A, Rosa-Martínez E, Prohens J, Cardi T	2021	BMC Plant Biol.	21	481	Genome wide association mapping for agronomic, fruit quality, and root architectural traits in tomato under organic farming conditions.
277	Resistance to bacterium Xanthomonas	t_QRL	rx			https://doi.org/10.1094/PHYTO-95-0519	Yang W, Sacks EJ, Lewis Ivey ML, Miller SA, Francis DM	2005	Phytopathology	95	519-527	Resistance in Lycopersicon esculentum intraspecific crosses to race T1 strains of Xanthomonas campestris pv. vesicatoria causing bacterial spot of tomato.
278						https://doi.org/10.1038/s41467-021-24267-6	Eggers E-J, van der Burgt A, van Heusden SAW, de Vries ME, Visser RGF, Bachem CWB, Lindhout p	2021	Nature Communications	12	4141	Neofunctionalisation of the Sli gene leads to self-compatibility and facilitates precision breeding in potato
279	Resistance to bacterium Xanthomonas	pe_R	Bs2			https://doi.org/10.1073/pnas.96.24.14153	Tai TH, Dahlbeck D, Clark ET, Gajiwala P, Pasion R, Whalen MC, Stall RE, Staskawicz BJ	1999	Proc Natl Acad Sci	96	14153-14158	Expression of the Bs2 pepper gene confers resistance to bacterial spot disease in tomato.
280	Resistance to fungus Alternaria	t_QRL	EBR			http://dx.doi.org/10.12988/asb.2015.41163	Ashrafi H, Foolad MR	2015	Advanced Studies in Biology	7	149-168	Characterization of early blight resistance in a recombinant inbred line population of tomato: II. Identification of QTLs and their co-localization with candidate resistance genes
281	Resistance to bacterium Ralstonia	t_QRL	tBWR			https://doi.org/10.1007/s11033-007-9204-1	Miao L, Shou S, Cai J, Jiang F, Zhu Z, Li H	2009	Mol Biol Rep	36	479-486.	Identification of two AFLP markers linked to bacterial wilt resistance in tomato and conversion to SCAR markers.
282	Resistance to virus CMV	t_QRL	CMV			https://doi.org/10.1007/s001220051512	Stamova BS, Chetelat RT	2000	Theor Appl Genet	101	527–537	Inheritance and genetic mapping of cucumber mosaic virus resistance introgressed from Lycopersicon chilense into tomato
283	Sugars			p_QTL	pTSC	https://doi.org/10.1186/1471-2229-10-271	Draffehn AM, Meller S, Li L, Gebhardt C	2010	BMC Plant Biol	10	271	Natural diversity of potato (Solanum tuberosum) invertases.
284	Resistance to virus TMV	t_R	Tm-2(2)			https://doi.org/10.1023/A:1025434519282	Lanfermeijer FC, Dijkhuis J, Sturre MJ, de Haan P, Hille J	2003	Plant Mol. Biol.	52	1037-1049	Cloning and characterization of the durable tomato mosaic virus resistance gene Tm-2(2) from Lycopersicon esculentum
285	Resistance to Phytophthora	t_QRL	tLBR			https://doi.org/10.1371/journal.pone.0096417	Chen A-L, Liu C-Y, Chen C-H, Wang J-F, Liao Y-C, Chang C-H, Tsai M-H, Hwu K-K, Chen K-Y	2014	PlosONE	9	e96417	Reassessment of QTLs for late blight resistance in the tomato accession L3708 using a restriction site associated DNA (RAD) linkage map and highly aggressive isolates of Phytophthora infestans
286	Resistance to virus TYLCV	t_QRL	Ty-5, qTy			https://doi.org/10.1007/s00122-009-1060-z	Anbinder I, Reuveni M, Azari R, Paran I, Nahon S, Shlomo H, Chen L, Lapidot M, Levin I	2009	Theor Appl Genet	119	519-530	Molecular dissection of tomato leaf curl virus resistance in tomato line TY172 derived from Solanum peruvianum
287	Resistance to virus TYLCV	t_R	ty-5			https://doi.org/10.21273/HORTSCI.47.3.324	Hutton SF, Scott JW, Schuster DJ	2012	HortScience	47	324-327	Recessive resistance to tomato yellow leaf curl virus from the tomato cultivar Tyking is located in the same region as Ty-5 on chromosome 4
288	Resistance to virus TSWV	t_R	Sw-5			https://doi.org/10.1094/MPMI.2000.13.10.1130	Brommonschenkel SH, Frary A, Frary A, Tanksley SD	2000	Mol Plant-Microbe Interact	13	1130-1138	The broad-spectrum Tospovirus resistance gene Sw-5 of tomato is a homolog of the root-knot nematode resistance gene Mi
289	Resistance to virus TYLCV	t_R	Ty-1, Ty-3			https://doi.org/10.1371/journal.pgen.1003399	Verlaan MG, Hutton SF, Ibrahem RM, Kormelink R, Visser RGF, Scott JW, Edwards JD, Bai Y	2013	PLOS Genetics	9	e1003399	The Tomato Yellow Leaf Curl Virus Resistance Genes Ty-1 and Ty-3 Are Allelic and Code for DFDGD-Class RNA–Dependent RNA Polymerases
290	Resistance to virus TYLCV	t_R	Ty-2			https://doi.org/10.1007/s11032-014-0072-9	Yang X, Caro M, Hutton SF, Scott JW, Guo Y, Wang X, Rashid MH, Szinay D, de Jong H, Visser RGF, Bai Y, Du Y	2014	Mol Breed	34	749-760	Fine mapping of the tomato yellow leaf curl virus resistance gene Ty-2 on chromosome 11 of tomato
291	Resistance to virus TYLCV	t_R	Ty-4			https://doi.org/10.21273/JASHS.134.2.281	Ji Y, Scott JW, Schuster DJ, Maxwell DP	2009	J Amer Soc Hort Sci	134	281-288	Molecular mapping of Ty-4, a new tomato yellow leaf curl virus resistance locus on chromosome 3 of tomato
292	Resistance to nematode Meloidogyne	t_R	Mi-9			https://doi.org/10.1104/pp.106.089615	Jablonska B, Ammiraju JSS, Bhattarai KK, Mantelin S, de Ilarduya OM, Roberts PA, Kaloshian I	2007	Plant Physiol	143	1044-1054	The Mi-9 gene from Solanum arcanum conferring heat-stable resistance to root-knot nematodes is a homolog of Mi-1
293	Resistance to Phytophthora, maturity	p_QRL	pLBR	p_QTL	pM	https://doi.org/10.3389/fgene.2015.00294	Muktar MS, Lübeck J, Strahwald J, Gebhardt C	2015	Front Genet	6	Article 294	Selection and validation of potato candidate genes for maturity corrected resistance to Phytophthora infestans based on differential expression combined with SNP association and linkage mapping.
294	Resistance to Phytophthora, maturity	p_QRL	pLBR	p_QTL	pM	https://doi.org/10.1371/journal.pone.0156254	Mosquera T, Alvarez MF, Jiménez-Gómez JM, Muktar MS, Paulo MJ, Steinemann S, Li J, Draffehn A, Hofmann A, Lübeck J, Strahwald J, Tacke E, Hofferbert H-R, Walkemeier B, Gebhardt C	2016	PlosONE	11	e0156254	Targeted and untargeted approaches unravel novel candidate genes and diagnostic SNPs for quantitative resistance of the potato (Solanum tuberosum L.) to Phytophthora infestans causing the late blight disease.
295	Resistance to virus TYLCV	t_QRL	qTy			https://doi.org/10.1007/s10681-012-0848-0	Kadirvel P, de la Peña R, Schafleitner R, Huang S, Geethanjali S, Kenyon L, Tsai W, Hanson P	2013	Euphytica	190	297–308	Mapping of QTLs in tomato line FLA456 associated with resistance to a virus causing tomato yellow leaf curl disease
296	Resistance to bacterium Ralstonia	t_QRL	BWR			https://doi.org/10.1007/s00122-018-3054-1	Kim B, Hwang IS, Lee HJ, Lee JM, Seo E, Choi D, Oh C-S	2018	Theor Appl Genet	131	1017-1030	Identification of a molecular marker tightly linked to bacterial wilt resistance in tomato by genome-wide SNP analysis.
297	Resistance to bacterium Ralstonia	t_QRL	tBWR			https://doi.org/10.1007/s10681-012-0830-x	Wang J-F, Ho F, Truong HTH, Huang S-M, Balataro CH, Dittapongpitch V, Hidayati N	2013	Euphytica	190	241–252	Identification of major QTLs associated with stable resistance of tomato cultivar ‘Hawaii 7996’ to Ralstonia solanacearum.
298	Resistance to insect Colorado beetle	p_QRL	CBR			https://doi.org/10.1007/BF00225792	Bonierbale MW, Plaisted RL, Pineda O, Tanksley SD	1994	Theor Appl Genet	87	973–987	QTL analysis of trichome-mediated insect resistance in potato.
299	Resistance to Phytophthora	p_R	R8			https://doi.org/10.1007/s00122-016-2740-0	Vossen JH, van Arkel G, Bergervoet M, Jo K-R, Jacobsen E, Visser RGF	2016	Theor Appl Genet	129	1785-1796	The Solanum demissum R8 late blight resistance gene is an Sw-5 homologue that has been deployed worldwide in late blight resistant varieties.
300	Resistance to Phytophthora	p_R	Rpi2			https://doi.org/10.3389/fpls.2017.01729	Yang L, Wang D, Xu Y, Zhao H, Wang L, Cao X, Chen Y, Chen Q	2017	Frontiers Plant Sci	8	1729	A new resistance gene against potato late blight originating from Solanum pinnatisectum located on potato chromosome 7
301	Sugars			t_QTL	tSS	https://doi.org/10.1007/BF00265610	Tanksley SD, Hewitt J	1988	Theor Appl Genet	75	811–823	Use of molecular markers in breeding for soluble solids content in tomato — a re-examination.
302	Resistance to Phytophthora	p_QRL	pLBR			doi: 10.1093/jxb/ery021	Jiang R, Li J, Tian Z; Du J, Armstrong M, Baker K, Tze-Yin Lim J, Vossen JH, He H, Portal L, Zhou J, Bonierbale M, Hein I, Lindqvist-Kreuze H, Xie C	2018	J Exp Bot	69	1545-1555	Potato late blight field resistance from QTL dPI09c is conferred by the NB-LRR gene R8
303	Resistance to fungus Fusarium	t_R	Frl			https://doi.org/10.1007/s00122-018-3136-0	Devran Z, Kahveci E, Hong Y, Studholme DJ, Tör M	2018	Theor Appl Genet	131	2099-2105	Identifying molecular markers suitable for Fr1 selection in tomato breeding
304	Resistance to fungus Synchytrium	p_QRL	Sen2 (RSe)			https://doi.org/10.1007/s00122-018-3154-y	Plich J, Przetakiewicz J, Śliwka J, Flis B, Wasilewicz-Flis I, Zimnoch-Guzowska E	2018	Theor Appl Genet	131	2321-2331	Novel gene Sen2 conferring broad-spectrum resistance to Synchytrium endobioticum mapped to potato chromosome XI
305	Yield, sugars			t_QTL	tFY, tSS	DOI: 10.1093/genetics/124.3.735	Paterson AH, DeVerna JW, Lanini B, Tanksley SD	1990	Genetics	124	735-742	Fine mapping of quantitative trait loci using selected overlapping recombinant chromosomes, in an interspecies cross of tomato.
306	Resistance to Phytophthora, maturity	p_QRL	pLBR	p_QTL	pM	https://doi.org/10.1007/s00122-002-1021-2	Visker MH, Keizer LC, Van Eck HJ, Jacobsen E, Colon LT, Struik PC	2003	Theor Appl Genet	106	317-325	Can the QTL for late blight resistance on potato chromosome 5 be attributed to foliage maturity type?
307	Yield, sugars			t_QTL	tFY, tSS	DOI: 10.1007/BF00225791	Azanza F, Young TE, Kim D, Tanksley SD, Juvik JA	1994	Theor Appl Genet	87	965–972	Characterization of the effect of introgressed segments of chromosome 7 and 10 from Lycopersion chmielewskii on tomato soluble solids, pH, and yield.
308	Yield, sugars			t_QTL	tFY, tSS	https://doi.org/10.1007/BF00222905	Goldman IL, Paran I, Zamir D	1995	Theor Appl Genet	90	925-932	Quantitative trait locus analysis of a recombinant inbred line population derived from a Lycopersicon esculentum x Lycopersicon cheesmanii cross.
309	Yield, sugars			t_QTL	tFY, tSS	https://doi.org/10.1007/BF00224033	Grandillo S, Tanksley SD	1996	Theor Appl Genet	92	935-951	QTL analysis of horticultural traits differentiating the cultivated tomato from the closely related species Lycopersicon pimpinellifolium.
310	Yield, sugars, maturity			t_QTL	tFY, tSS, tM	https://doi.org/10.1007/BF00223378	Tanksley SD, Grandillo S, Fulton TM, Zamir D, Eshed Y, Petiard V, Lopez J, Beck-Bunn T	1996	Theor Appl Genet	92	213-224	Advanced backcross QTL analysis in a cross between an elite processing line of tomato and its wild relative L. pimpinellifolium.
311	Yield, sugars, maturity			t_QTL	tFY, tSS, tM	https://doi.org/10.1007/s001220050639	Fulton TM, Beck-Bunn T, Emmatty D, Eshed Y, Lopez J, Petiard V, Uhlig J, Zamir D, Tanksley SD	1997	Theor Appl Genet	95	881–894	QTL analysis of an advanced backcross of Lycopersicon peruvianum to the cultivated tomato and comparisons with QTLs found in other wild species.
312	Yield, sugars, maturity			t_QTL	tFY, tSS, tM	https://doi.org/10.1007/s001220050908	Bernacchi D; Beck-Bunn T, Eshed Y, Lopez J, Petiard V, Uhlig J, Zamir D, Tanksley SD	1998	Theor Appl Genet	97	381–397	Advanced backcross QTL analysis in tomato. I. Identification of QTLs for traits of agronomic importance from Lycopersicon hirsutum.
313	Yield, sugars			t_QTL	tFY, tSS	https://doi.org/10.1023/A:1009656910457	Chen FQ, Foolad MR, Hyman J, St. Clair DA, Beelaman RB	1999	Mol Breed	5	283–299	Mapping of QTLs for lycopene and other fruit traits in a Lycopersicon esculentum × L. pimpinellifolium cross and comparison of QTLs across tomato species.
314	Yield, sugars, maturity			t_QTL	tFY, tSS, tM	https://doi.org/10.1007/s001220051384	Fulton TM, Grandillo S, Beck-Bunn T, Fridman E, Frampton A, Lopez J, Petiard V, Uhlig J, Zamir D, Tanksley SD	2000	Theor Appl Genet	100	1025–1042	Advanced backcross QTL analysis of a Lycopersicon esculentum × Lycopersicon parviflorum cross.
315	Resistance to virus TMV	t_R	Tm-1			https://doi.org/10.1073/pnas.0703203104	Ishibashi K, Masuda K, Naito S, Meshi T, Ishikawa, M	2007	Proc Natl Acad Sci	104	13833-13838	An inhibitor of viral RNA replication is encoded by a plant resistance gene
316	Resistance to bacterium Xanthomonas	pe_R	Bs3			DOI: 10.1126/science.1144958	Römer P, Hahn S, Jordan T, Strauss T, Bonas U, Lahaye T	2007	Science	318	645-648	Plant pathogen recognition mediated by promoter activation of the pepper Bs3 resistance gene.
317	Resistance to fungus Synchytrium	p_QRL	RSe			https://doi.org/10.1007/s00122-018-3172-9	Bartkiewicz A, Chilla F, Terefe-Ayana D, Lübeck J, Strahwald J, Tacke E, Hofferbert H-R, Flath K, Linde M, Debener T	2018	Theor Appl Genet	131	2555-2566	Improved genetic resolution for linkage mapping of resistance to potato wart in monoparental dihaploids with potential diagnostic value in tetraploid potato varieties
318	Yield, sugars			t_QTL	tFY, tSS	https://doi.org/10.1007/s001220050061	Monforte AJ, Tanksley SD	2000	Theor Appl Genet	100	471–479	Fine mapping of a quantitative trait locus (QTL) from Lycopersicon hirsutum chromosome 1 affecting fruit characteristics and agronomic traits: breaking linkage among QTLs affecting different traits and dissection of heterosis for yield.
319	Yield, sugars			t_QTL	tFY, tSS	https://doi.org/10.1007/s001220051643	Saliba-Colombani V, Causse M, Langlois D, Philouze J, Buret M	2001	Theor Appl Genet	102	259–272	Genetic analysis of organoleptic quality in fresh market tomato. 1. Mapping QTLs for physical and chemical traits.
320	Yield, sugars			t_QTL	tFY, tSS	https://doi.org/10.1023/B:MOLB.0000012325.77844.0c	Lecomte L, Saliba-Colombani V, Gautier A, Gomez-Jimenez MC, Duffé P, Buret M, Causse M	2004	Mol Breed	13	1-14	Fine mapping of QTLs of chromosome 2 affecting the fruit architecture and composition of tomato.
321	Yield, sugars			t_QTL	tFY, tSS	https://doi.org/10.1023/A:1020209930031	Fulton TM, Bucheli P, Voirol E, Lopez J, Petiard V, Tanksley SD	2002	Euphytica	120	163–177	Quantitative trait loci (QTL) affecting sugars, organic acids and other biochemical properties possibly contributing to flavor, identified in four advanced backcross populations of tomato.
322	Yield, maturity			p_QTL	pTY, pTW, pM	https://doi.org/10.1007/s00122-016-2665-7	Schönhals EM, Ortega F, Barandalla L, Aragones A, Ruiz de Galarreta JI, Liao J-C, Sanetomo R, Walkemeier B, Tacke E, Ritter E, Gebhardt C	2016	Theor Appl Genet	129	767-785	Identification and reproducibility of diagnostic DNA markers for tuber starch and yield optimization in a novel association mapping population of potato (Solanum tuberosum L.).
323	Sugars			t_QTL	tSS	https://doi.org/10.1139/g02-122	Frary A, Doganlar S, Frampton A, Fulton T, Uhlig J, Yates H, Tanksley S	2003	Genome	46	235–243	Fine mapping of quantitative trait loci for improved fruit characteristics from Lycopersicon chmielewskii chromosome 1.
324	Yield, sugars			t_QTL	tFY, tSS	https://doi.org/10.1007/s00122-003-1422-x	Frary A, Fulton TM, Zamir D, Tanksley S	2004	Theor Appl Genet	108	485–496	Advanced backcross QTL analysis of a Lycopersicon esculentum × L. pennellii cross and identification of possible orthologs in the Solanaceae.
325	Yield, sugars			t_QTL	tFY, tSS	https://doi.org/10.1023/B:EUPH.0000013314.04488.87	Yates HE, Frary A, Doganlar S, Frampton A, T. Eannetta NT, Uhlig J, Tanksley SD	2004	Euphytica	135	283–296	Comparative fine mapping of fruit quality QTLs on chromosome 4 introgressions derived from two wild tomato species.
326	Yield, sugars			t_QTL	tFY, tSS	DOI: 10.1007/s00122-010-1412-8	Gur A, Osorio S, Fridman E, Fernie AR, Zamir D	2010	Theor Appl Genet	121	1587–1599	hi2-1, A QTL which improves harvest index, earliness and alters metabolite accumulation of processing tomatoes.
327	Resistance to Phytophthora	t_QRL	tLBR			https://doi.org/10.1534/g3.113.007195	Haggard JE, Johnson EB, St. Clair DA	2013	G3	3	2131–2146	Linkage relationships among multiple QTL for horticultural traits and late blight (P. infestans) resistance on chromosome 5 introgressed from wild tomato Solanum habrochaites.
328	Resistance to fungus Fusarium	t_R	I-3			https://doi.org/10.1111/nph.13348	Catanzariti A-M, Lim GTT, Jones DA	2015	New Phytologist	207	106-118	The tomato I‐3 gene: a novel gene for resistance to Fusarium wilt disease
329	Resistance to insect whitefly	t_QRL	WR			https://doi.org/10.1007/s00122-018-3239-7	Vosman B, A Kashaninia A, van’t Westende W, Meijer‑Dekens F, van Eekelen H, Visser RGF, de Vos RCH, Voorrips RE	2019	Theor Appl Genet	132	531–541	QTL mapping of insect resistance components of Solanum galapagense.
330	Resistance to insect whitefly	t_QRL	WR			https://doi.org/10.1007/s00122-013-2067-z	Firdaus S, van Heusden AW, Hidayati N, Supena EDJ, Mumm R, de Vos RCH, Visser RGF, Vosman B	2013	Theor Appl Genet	126	1487-1501	Identification and QTL mapping of whitefly resistance components in Solanum galapagense.
331	Resistance to insect whitefly	t_QRL	WR			https://doi.org/10.21273/JASHS.135.2.134	Momotaz A, Scott JW, Schuster DJ	2010	J Amer Soc Hort Sci	135	134-142	Identification of quantitative trait loci conferring resistance to Bemisia tabaci in an F2 population of Solanum lycopersicum × Solanum habrochaites Accession LA1777.
332	Yield, sugars			t_QTL	tFW, tSS	https://doi.org/10.1186/s12864-016-3406-7	Celik I, Gurbuz N, Uncu AT, Frary A, Doganlar S	2017	BMC Genomics	18	1	Genome-wide SNP discovery and QTL mapping for fruit quality traits in inbred backcross lines (IBLs) of Solanum pimpinellifolium using genotyping by sequencing.
333	Resistance to insect Tetranychus	t_QRL	Rtu			https://doi.org/10.1007/s00122-012-1961-0	Salinas M, Capel C, Alba JM, Mora B, Cuartero J, Fernández-Muñoz R, Lozano R, Capel J	2013	Theor Appl Genet	126	83-92	Genetic mapping of two QTL from the wild tomato Solanum pimpinellifolium L. controlling resistance against two-spotted spider mite (Tetranychus urticae Koch.
334	Resistance to insect Colorado beetle	p_QRL	CBR			https://doi.org/10.1111/j.1570-7458.1996.tb02026.x	Yencho GC, Bonierbale MW, Tingey WM, Plaisted RL, Tanksley SD	1996	Entomologia Experimentalis et Applicata	81	141-154	Molecular markers locate genes for resistance to the Colorado potato beetle, Leptinotarsa decemlineata, in hybrid Solanum tuberosum x S. berthaultii potato progenies.
335	Resistance to fungus Fusarium	t_R	I-7 (I7)			https://doi.org/10.1111/mpp.12294	Gonzalez-Cendales Y, Catanzariti A-M, Baker B, Mcgrath DJ, Jones DA	2016	Mol Plant Pathol	17	448-463	Identification of I-7 expands the repertoire of genes for resistance to Fusarium wilt in tomato to three resistance gene classes
336	Resistance to fungus Fusarium	t_R	I			https://doi.org/10.1111/tpj.13458	Catanzariti A-M, Do HTT, Bru P, de Sain M, Thatcher LF, Rep M, Jones DA	2017	Plant J	89	1195-1209	The tomato I gene for Fusarium wilt resistance encodes an atypical leucine-rich repeat receptor-like protein whose function is nevertheless dependent on SOBIR1 and SERK3/BAK1
337	Yield, sugars			t_QTL	tFW, tSS	https://doi.org/10.1093/hr/uhab009	Zhao J, Sauvage C, Bitton F, Causse M	2022	Hortic Res.	9	uhab009	Multiple haplotype-based analyses provide genetic and evolutionary insights into tomato fruit weight and composition.
338	Resistance to bacterium Xanthomonas	t_R	Rx4			https://doi.org/10.1007/s00122-011-1726-1	Pei C, Wang H, Zhang J, Wang Y, Francis DM, Yang W	2012	Theor Appl Genet	124	533-542	Fine mapping and analysis of a candidate gene in tomato accession PI128216 conferring hypersensitive resistance to bacterial spot race T3
339	Resistance to bacterium Xanthomonas	t_QRL	rx			https://doi.org/10.1094/PHYTO-02-15-0051-R	Sim S-C, Robbins MD, Wijeratne S, Wang H, Yang W, Francis DM	2015	Phytopathol	105	1437-1445	Association analysis for bacterial spot resistance in a directionally selected complex breeding population of tomato.
340						https://doi.org/10.1007/s00122-016-2754-7	Dzidzienyo DK, Bryan GJ, Wilde G, Robbins TP	2016	Theor Appl Genet	129	1985–2001	Allelic diversity of S-RNase alleles in diploid potato species
341	Resistance to Phytophthora	p_QRL	pLBR			https://doi.org/10.3389/fpls.2017.01040	Álvarez MF, Angarita M, Delgado MC, García C, Jiménez-Gomez J, Gebhardt C, Mosquera T	2017	Front Plant Sci	8	1040	Identification of novel associations of candidate genes with resistance to late blight in Solanum tuberosum group Phureja
342	Resistance to Phytophthora	t_QRL	tLBR			https://doi.org/10.3835/plantgenome2018.01.0007	Ohlson EW, Ashrafi H, Foolad MR	2018	Plant Genome	11	180007	Identification and mapping of late blight resistance quantitative trait loci in tomato accession PI 163245
343	Resistance to virus PVY	pe_R	pvr1			https://doi.org/10.1111/j.1365-313X.2005.02381.x	Kang, B-C, Yeam I, Frantz JD, Murphy JF, Jahn MM	2005	Plant J	42	392–405	The pvr1 Locus in Capsicum encodes a translation initiation factor eIF4E that interacts with Tobacco etch virus VPg
344	Resistance to nematode Globodera rostochiensis	p_R	H1			https://doi.org/10.1007/s00122-010-1472-9	Finkers-Tomczak A, Bakker E, de Boer J, van der Vossen E, Achenbach U, Golas T, Suryaningrat S, Smant G, Bakker J, Goverse A	2011	Theor Appl Genet	122	595-608	Comparative sequence analysis of the potato cyst nematode resistance locus H1 reveals a major lack of co-linearity between three haplotypes in potato (Solanum tuberosum ssp.)
345	Resistance to Phytophthora, maturity	p_QRL	pLBR	p_QTL	pM	https://doi.org/10.1534/genetics.108.094268	Pajerowska-Mukhtar K, Stich B, Achenbach U, Ballvora A, Lübeck J, Strahwald J, Tacke E, Hofferbert H-R, Ilarionova E, Bellin D, Walkemeier B, Basekow R, Kersten B, Gebhardt C	2009	Genetics	181	1115–1127	Single nucleotide polymorphisms in the allene oxide synthase 2 gene are associated with field resistance to late blight in populations of tetraploid potato cultivars.
346	Resistance to Phytophthora, resistance to insect Tecia	p_QRL	pLBR, Ts			https://doi.org/10.1371/journal.pone.0199716	Santa JD, Berdugo-Cely J, Cely-Pardo L, Soto-Suarez M, Mosquera T, Galeano M. CH	2018	PLoS ONE	13	e0199716	QTL analysis reveals quantitative resistant loci for Phytophthora infestans and Tecia solanivora in tetraploid potato (Solanum tuberosum L.).
347	Resistance to bacterium Xanthomonas	t_R	Xv3, Rx4			https://doi.org/10.16420/j.issn.2095-9885.2015-0001	Baimei Z, Haipeng C, Junjie D, Wencai Y	2015	Hort Plant J	1	41-47	Allelic tests and sequence analysis of three genes for resistance to Xanthomonas perforans race T3 in tomato.
348	Resistance to fungus Leveilulla	t_R	Lv			https://doi.org/10.1007/s001220050551	Chunwongse J, Doganlar S, Crossman C, Jiang J, Tanksley SD	1997	Theor Appl Genet	95	220-223	High-resolution genetic map of the Lv resistance locus in tomato
349	Resistance to fungus Oidium	t_R	Ol-qtl			https://doi.org/10.1007/s00122-004-1698-5	Bai Y, van der Hulst R, Huang CC, Wei L, Stam P, Lindhout P	2004	Theor Appl Genet	109	1215-1223	Mapping Ol-4, a gene conferring resistance to Oidium neolycopersici and originating from Lycopersicon peruvianum LA2172, requires multi-allelic, single-locus markers
350	Resistance to fungus Oidium	t_R	Ol-1, Ol-3, Ol-4, Ol-5, Ol-6			https://doi.org/10.1094/MPMI-18-0354	Bai Y, van der Hulst R, Bonnema G, Marcel TC, Meijer-Dekens F, Niks RE, Lindhout P	2005	Mol Plant-Microbe Interact	18	354-362	Tomato defense to Oidium neolycopersici: Dominant OI genes confer isolate-dependent resistance via a different mechanism than recessive oI-2
351	Resistance to fungus Oidium	t_R	Ol-4, Ol-6			https://doi.org/10.1094/MPMI-06-10-0145	Seifi A, Kaloshian I, Vossen J, Che D, Bhattarai KK, Fan J, Naher Z, Goverse A, Tjallingii WF, Lindhout P, Visser RGF, Bai Y	2011	Mol Plant-Microbe Interact	24	441-450	Linked, if not the same, Mi-1 homologues confer resistance to tomato powdery mildew and root-knot nematodes
352	Resistance to fungus Oidium	t_QRL	Ol-qtl			https://doi.org/10.1007/s10681-011-0551-6	Faino L, Azizinia S, Hassanzadeh BH, Verzaux E, Ercolano MR, Visser RGF, Bai Y:	2012	Euphytica	184	223-234	Fine mapping of two major QTLs conferring resistance to powdery mildew in tomato
353	Resistance to Phytophthora, yield, sugars, maturity	t_QRL	tLBR	t_QTL	tFY, tSS, tM	https://doi.org/10.1534/g3.114.014654	Haggard JE, Johnson EB, St Clair DA	2014	G3: Genes|Genomes|Genetics	5	219-233	Multiple QTL for horticultural traits and quantitative resistance to Phytophthora infestans linked on Solanum habrochaites chromosome 11.
354	Maturity			p_QTL	pM *	https://doi.org/10.1038/nature11912	Kloosterman B, Abelenda JA, Gomez MdMC, Oortwijn M, de Boer JM, Kowitwanich K, Horvath BM, van Eck HJ, Smaczniak C, Prat S, Visser RGV, Bachem C	2013	Nature	495	246-250	Naturally occurring allele diversity allows potato cultivation in northern latitudes.
355	Sugars			p_QTL	pTSC	DOI: 10.3389/fpls.2018.00315	Xiao G, Huang W, Cao H, Tu W, Wang H, Zheng X, Liu J, Song B, Xie C	2018	Frontiers Plant Sci	9	315	Genetic loci conferring reducing sugar accumulation and conversion of cold-stored potato tubers revealed by QTL analysis in a diploid population.
356	Resistance to Phytophthora, resistance to bacterium Streptomyces	p_QRL	pLBR, CSR			https://doi.org/10.1534/g3.118.200273	Enciso-Rodriguez F, Douches D, Lopez-Cruz M, Coombs J, de Los Campos G	2018	G3	8	2471-2481	Genomic selection for late blight and common scab resistance in tetraploid potato (Solanum tuberosum).
357	Resistance to virus PVY	p_R	Ry-sto			https://doi.org/10.1111/pbi.13230	Grech-Baran M, Witek K, Szajko K, Witek AI, Morgiewicz K, Wasilewicz-Flis I, Jakuczun H, Marczewski W, DG Jones J, Hennig J	2018	Plant Biotechnology J	18	655-667	Extreme resistance to Potato Virus Y in potato carrying the Rysto gene is mediated by a TIR-NLR immune receptor
358	Resistance to Phytophthora	p_R	Rpi-sto1, Rpi-pta1			https://doi.org/10.1371/journal.pone.0002875	Vleeshouwers VG, Rietman H, Krenek P, Champouret N, Young C, Oh SK, Wang M, Bouwmeester K, Vosman B, Visser RG, Jacobsen E, Govers F, Kamoun S, Van der Vossen EA.	2008	PloSOne	3	e2875	Effector genomics accelerates discovery and functional profiling of potato disease resistance and Phytophthora infestans avirulence genes
359	Resistance to fungus Synchytrium	p_R	Sen3			https://doi.org/10.1186/s13007-019-0445-5	Prodhomme C, Esselink D, Borm T, Visser RGF, van Eck HJ, Vossen JH	2019	Plant Methods	15	60	Comparative Subsequence Sets Analysis (CoSSA) is a robust approach to identify haplotype specific SNPs; mapping and pedigree analysis of a potato wart disease resistance gene Sen3
360	Yield, sugars			p_QTL	pTY, pTW, pTSC	https://doi.org/10.1007/s11032-017-0619-7	Rak K, Bethke PC, Palta JP	2017	Mol Breed	37	15	QTL mapping of potato chip color and tuber traits within an autotetraploid family.
361						https://doi.org/10.1007/s00122-004-1829-z	Jung CS, Griffiths HM, De Jong DM, Cheng S, Bodis M, De Jong WS	2005	Theor Appl Genet	110	269–275	The potato P locus codes for flavonoid 3′,5′-hydroxylase
362	Resistance to nematode Globodera pallida	p_R	H2			https://doi.org/10.1007/s00122-019-03278-4	Strachan SM, Armstrong MR, Kaur A, Wright KM, Lim TY, Baker K, Jones J, Bryan G, Blok V, Hein I	2019	Theor Appl Genet	132	1283–1294	Mapping the H2 resistance effective against Globodera pallida pathotype Pa1 in tetraploid potato
363	Resistance to virus TYLCV	t_R	Ty-2			https://doi.org/10.1007/s00122-018-3082-x	Yamaguchi H, Ohnishi J, Saito A, Ohyama A, Nunome T, Miyatake K, Fukuoka H	2018	Theor Appl Genet	131	1345-1362	An NB-LRR gene, TYNBS1, is responsible for resistance mediated by the Ty-2 Begomovirus resistance locus of tomato
364	Resistance to Phytophthora	p_R	Rpi-amr3i			https://doi.org/10.1038/nbt.3540	Witek K, Jupe F, Witek AI, Baker D, Clark MD, Jones JDG	2016	Nature Biotechnology	34	656	Accelerated cloning of a potato late blight–resistance gene using RenSeq and SMRT sequencing
365	Resistance to Phytophthora	p_R	Rpi-edn2			https://patents.google.com/patent/US20140041072A1/en	De Vetten NCMH, Jacobsen E, Rietman H, Verzaux EC, Visser RGF, Vleeshouwers VGAA, Vossen JH	2018	Patent WO2011152722A3			Cloning and exploitation of a functional R-gene from Solanum x edinense
366	Resistance to Phytophthora	p_R	R2, Rpi-mcq1			doi: 10.1016/j.simyco.2018.01.002	Aguilera-Galvez C, Champouret N, Rietman H, Lin X, Wouters D, Chu Z, Jones JDG, Vossen JH, Visser RGF, Wolters PJ et al:	2018	Stud Mycol	89	105-115	Two different R gene loci co-evolved with Avr2 of Phytophthora infestans and confer distinct resistance specificities in potato
367	Resistance to virus PVY	pe_R	Pvr4, Tsw			https://doi.org/10.1111/nph.14177	Kim S-B, Kang W-H, Huy HN, Yeom S-I, An J-T, Kim S, Kang M-Y, Kim HJ, Jo YD, Ha Y et al	2017	New Phytologist	213	886-899	Divergent evolution of multiple virus-resistance genes from a progenitor in Capsicum spp
368	Resistance to virus TMV	to_R	N			https://doi.org/10.1016/0092-8674(94)90283-6	Whitham S, Dinesh-Kumar SP, Choi D, Hehl R, Corr C, Baker B	1994	Cell	78	1101-1115	The product of the tobacco mosaic virus resistance gene N: Similarity to toll and the interleukin-1 receptor
369	Resistance to virus TYLCV	t_R	Ty-6			https://doi.org/10.1007/s00122-019-03298-0	Gill U, Scott JW, Shekasteband R, Ogundiwin E, Schuit C, Francis DM, Sim S-C, Smith H, Hutton SF	2019	Theor Appl Genet	132	1543-1554	Ty-6, a major begomovirus resistance gene on chromosome 10, is effective against Tomato yellow leaf curl virus and Tomato mottle virus
370	Resistance to virus TYLCV	t_R	ty-5 (pelota)			https://doi.org/10.1371/journal.pgen.1005538	Lapidot M, Karniel U, Gelbart D, Fogel D, Evenor D, Kutsher Y, Makhbash Z, Nahon S, Shlomo H, Chen L, Reuveni M, Levin I	2015	PLOSGenetics	11	e1005538	A Novel Route Controlling Begomovirus Resistance by the Messenger RNA Surveillance Factor Pelota
371	Resistance to Phytophthora	t_QRL	tLBR			https://doi.org/10.1534/g3.112.003459	Johnson EB, Haggard JE, St Clair DA	2012	G3	2	1145-1159	Fractionation, stability, and isolate-specificity of QTL for resistance to Phytophthora infestans in cultivated tomato (Solanum lycopersicum)
372	Resistance to virus TMV	pe_R	L3			https://doi.org/10.1007/s00122-008-0848-6	Tomita R, Murai J, Miura Y, Ishihara H, Liu S, Kubotera Y, Honda A, Hatta R, Kuroda T, Hamada H et al.	2008	Theor Appl Genet	117	1107-1118	Fine mapping and DNA fiber FISH analysis locates the tobamovirus resistance gene L3 of Capsicum chinense in a 400-kb region of R-like genes cluster embedded in highly repetitive sequences
373	Resistance to Phytophthora	pe_QRL	peLBR			https://doi.org/10.1007/BF00417941	Lefebvre V, Palloix A	1996	Theor Appl Genet	96	503–511	Both epistatic and additive effects of QTLs are involved in polygenic induced resistance to disease: a case study, the interaction pepper—Phytophthora capsici Leonian
374	Resistance to bacterium Streptomyces, yield, sugars	p_QRL	CSR	p_QTL	pTW, pTSC	https://doi.org/10.3835/plantgenome2016.10.0110	Braun SR, Endelman JB, Haynes KG, Jansky SH	2017	Plant Genome	10	plantgenome2016.10.0110	Quantitative trait loci for resistance to common scab and cold-induced sweetening in diploid potato.
375	Resistance to fungus Cladosporium	t_R	Cf-19			https://doi.org/10.1186/s12870-016-0737-0	Zhao T, Jiang J, Liu G, He S, Chen X, Li J, Xu X	2016	BMC Plant Biology	16	51	Mapping and candidate gene screening of tomato Cladosporium fulvum-resistant gene Cf-19, based on high-throughput sequencing technology.
376	Resistance to fungus Cladosporium	t_R	Cf-10			https://doi.org/10.1186/s12870-018-1616-7	Liu G, Zhao T, You X, Jiang J, Li, J, Xu X	2019	BMC Plant Biology	19	15	Molecular mapping of the Cf-10 gene by combining SNP/InDel-index and linkage analysis in tomato (Solanum lycopersicum)
377	Yield			t_QTL	tFW	https://doi.org/10.1111/pbi.12282	Pascual L, Desplat N, Huang BE, Desgroux A, Bruguier L, Bouchet J-P, Le QH, Chauchard B, Verschave P, Causse M	2015	Plant Biotechnol J	13	565-577	Potential of a tomato MAGIC population to decipher the genetic control of quantitative traits and detect causal variants in the resequencing era.
378	Resistance to virus PVY	pe_R	Pvr4, Pvr7			https://doi.org/10.1007/s001220051552	Grube RC, Blauth JR, Arnedo Andrés MS, Caranta C, Jahn MK	2000	Theor Appl Genet	101	852-859	Identification and comparative mapping of a dominant potyvirus resistance gene cluster in Capsicum
379	Resistance to virus PVY	pe_R	Pvr7			https://doi.org/10.1094/PHYTO-07-17-0231-R	Venkatesh J, An J, Kang W-H, Jahn M, Kang B-C	2018	Phytopathology	108	142-148	Fine mapping of the dominant potyvirus resistance gene Pvr7 reveals a relationship with Pvr4 in Capsicum annuum
380	Resistance to Phytophthora	p_R	Rpi-blb3, Rpi-abpt, R2, R2-like			https://doi.org/10.1094/MPMI-22-6-0630	Lokossou AA, Park T-h, van Arkel G, Arens M, Ruyter-Spira C, Morales J, Whisson SC, Birch PRJ, Visser RGF, Jacobsen E et al	2009	Mol Plant-Microbe Interact	22	630-641	Exploiting knowledge of R/Avr genes to rapidly clone a new LZ-NBS-LRR family of late blight resistance genes from potato linkage group IV
381	Resistance to Phytophthora	p_R	R3a			https://doi.org/10.1111/j.1365-313X.2005.02365.x	Huang S, van der Vossen EAG, Kuang H, Vleeshouwers VGAA, Zhang N, Borm TJA, van Eck HJ, Baker B, Jacobsen E, Visser RGF	2005	Plant J	42	251-261	Comparative genomics enabled the isolation of the R3a late blight resistance gene in potato
382	Resistance to Phytophthora	p_R	R3b			https://doi.org/10.1094/MPMI-11-10-0276	Li G, Huang S, Guo X, Li Y, Yang Y, Guo Z, Kuang H, Rietman H, Bergervoet M, Vleeshouwers VGGA et al	2011	Mol Plant-Microbe Interact	24	1132-1142	Cloning and characterization of R3b; members of the R3 superfamily of late blight resistance genes show sequence and functional divergence
383	Resistance to bacterium Ralstonia	p_QRL	pBWR			https://doi.org/10.1270/jsbbs.19059	Habe I, Miyatake K, Nunome T, Yamasaki M, Hayashi T	2019	Breeding Science	69	592-600	QTL analysis of resistance to bacterial wilt caused by Ralstonia solanacearum in potato.
384	Resistance to Phytophthora	t_QRL	tLBR			https://doi.org/10.3390/ijms18071589	Panthee DR, Piotrowski A, Ibrahem R	2017	Int J Mol Sci	18	1589	Mapping quantitative trait loci (QTL) for resistance to late blight in tomato
385	Resistance to Phytophthora	p_QRL	pLBR			https://doi.org/10.3389/fpls.2013.00423	Draffehn A, Li L, Krezdorn N, Ding J, Lübeck J, Strahwald J, Muktar M, Walkemeier B, Rotter B, Gebhardt C	2013	Frontiers in Plant Science	4	Article 423	Comparative transcript profiling by SuperSAGE identifies novel candidate genes for controlling potato quantitative resistance to late blight not compromised by late maturity
386	Resistance to virus PVY	p_R	Ry(o)-phu			https://doi.org/10.1007/s00122-019-03521-y	Torrance L, Cowan GH, McLean K, MacFarlane S, Al-Abedy AN, Armstrong M, Lim T-Y, Hein I, Bryan GJ	2020	Theor Appl Genet	133	967–980	Natural resistance to Potato virus Y in Solanum tuberosum Group Phureja
387	Resistance to bacterium Ralstonia	me_QRL	BWR			https://doi.org/10.3390/ijms19020357	Salgon S, Raynal M, Lebon S, Baptiste JM, Daunay MC, Dintinger J, Jourda C	2018	Int J Mol Sci	19	2018/01/26	Genotyping by sequencing highlights a polygenic resistance to Ralstonia pseudosolanacearum in eggplant (Solanum melongena L.).
388	Resistance to Phytophthora	p_R	Rpi-ver1			https://doi.org/10.1007/s00122-018-3078-6	Chen X, Lewandowska D, Armstrong MR, Baker K, Lim T-Y, Bayer M, Harrower B, McLean K, Jupe F, Witek K, Lees AK, Jones JD, Bryan GJ, Hein I	2018	Theor Appl Genet	131	1287-1297	Identification and rapid mapping of a gene conferring broad-spectrum late blight resistance in the diploid potato species Solanum verrucosum through DNA capture technologies
389						https://doi.org/10.1007/s00122-001-0775-2	Areshchenkova T, Ganal MW	2002	Theor Appl Genet	104	229-235	Comparative analysis of polymorphism and chromosomal location of tomato microsatellite markers isolated from different sources
390	Resistance to insect Colorado beetle	p_QRL	CBR			https://doi.org/10.1007/s00122-020-03619-8	Kaiser N, Manrique-Carpintero NC, DiFonzo C, Coombs J, Douches D	2020	Theor Appl Genet	133	2583–2603	Mapping Solanum chacoense mediated Colorado potato beetle (Leptinotarsa decemlineata) resistance in a self-compatible F2 diploid population.
391	Yield			t_QTL	tFW	https://doi.org/10.1186/s12870-014-0337-9	Ruggieri V, Francese G, Sacco A, D’Alessandro A, Rigano MM, Parisi M, Milone M, Cardi T, Mennella G, Barone A	2014	BMC Plant Biol	14	337	An association mapping approach to identify favourable alleles for tomato fruit quality breeding.
392	Sugars			t_QTL	tSS *	https://doi.org/10.1073/pnas.97.9.4718	Fridman E, Pleban T, Zamir D	2000	Proc Natl Acad Sci	97	4718-4723	A recombination hotspot delimits a wild-species quantitative trait locus for tomato sugar content to 484 bp within an invertase gene.
393	Yield, sugars			t_QTL	tFW, tSS	DOI: 10.1093/jxb/erf058	Causse M, Saliba-Colombani V, Lecomte L, Duffé P, Rousselle P, Buret M.	2002	J Exp Botany	53	2089-2098	QTL analysis of fruit quality in fresh market tomato: a few chromosome regions control the variation of sensory and instrumental traits.
394	Resistance to Phytophthora	p_QRL	pLBR			https://doi.org/10.1007/s00425-008-0737-x	Pajerowska-Mukhtar KM, Mukhtar MS, Guex N, Halim VA, Rosahl S, Somssich IE, Gebhardt C Planta. 2008 Jul;228(2):293-306. doi: 10.1007/s00425-008-0737-x. Epub 2008 Apr 23. PMID: 18431595; PMCID: PMC2440949.	2008	Planta	228	293-306	Natural variation of potato allene oxide synthase 2 causes differential levels of jasmonates and pathogen resistance in Arabidopsis.
395	Resistance to nematode Meloidogyne	pe_R	Me1			https://doi.org/10.1007/s10681-015-1489-x	Uncu AT, Celik I, Devran Z, Ozkaynak E, Frary A, Doganlar S	2015	Euphytica	206	393–399	Development of a SNP-based CAPS assay for the Me1 gene conferring resistance to root knot nematode in pepper
396	Resistance to nematode Meloidogyne	pe_R	Me1			https://doi.org/10.1007/s11032-018-0793-2	Wang X, Fazari A, Cao Y, Zhang Z, Palloix A, Mao S, Zhang B, Dijan-Caporalino C, Wang L	2018	Mol Breed	38	39	Fine mapping of the root-knot nematode resistance gene Me1 in pepper (Capsicum annuum L.) and development of markers tightly linked to Me1.
397	Resistance to virus PVY	pe_R	pvr6			https://doi.org/10.1099/vir.0.81817-0	Ruffel S, Gallois JL, Moury B, Robaglia C, Palloix A, Caranta C	2006	J Gen Virol	87	2089–2098	Simultaneous mutations in translation initiation factors eIF4E and eIF(iso)4E are required to prevent pepper veinal mottle virus infection of pepper
398	Resistance to virus PVY	pe_R	Pvr9			https://doi.org/10.1016/j.virol.2015.02.052	Tran PT, Choi H, Choi D, Kim KH	2015	Virology	481	113-123	Molecular characterization of Pvr9 that confers a hypersensitive response to Pepper Mottle Virus (a potyvirus) in Nicotiana benthamiana.
399	Resistance to Phytophthora	pe_QRL	peLBR			https://doi.org/10.3835/plantgenome2014.03.0011	Rehrig WZ, Ashrafi H, Hill T, Prince J, Van Deynze A	2014	The Plant Genome	7	plantgenome2014.03.0011	CaDMR1 Cosegregates with QTL Pc5.1 for Resistance to Phytophthora capsici in Pepper (Capsicum annuum)
400	Resistance to Phytophthora	pe_R	CaPhyto			https://doi.org/10.1007/s11032-016-0464-0	Wang P, Wang L, Guo J, Yang W, Shen H	2016	Mol Breed	36	66	Molecular mapping of a gene conferring resistance to Phytophthora capsici Leonian race 2 in pepper line PI201234 (Capsicum annuum L.)
401	Resistance to virus CMV	pe_QRL	CMV			https://doi.org/10.1007/s00122-016-2790-3	Guo G, Wang S, Liu J, Pan B, Diao W, Ge W, Gao C, Snyder JC	2017	Theor Appl Genet	130	41–52	Rapid identification of QTLs underlying resistance to Cucumber mosaic virus in pepper (Capsicum frutescens)
402	Resistance to fungus Stemphylium	t_R	Sm			https://doi.org/10.1007/s00122-022-04047-6	Yang H, Wang H, Jiang J, Liu M, Liu Z, Tan Y, Zhao T, Zhang H, Chen X, Li J, Wang A, Du M, Xu X	2022	Theor Appl Genet	135	1467–1476	The Sm gene conferring resistance to gray leaf spot disease encodes an NBS-LRR (nucleotide-binding site-leucine-rich repeat) plant resistance protein in tomato
403	Resistance to virus TSWV	t_QRL	SlSW5-1			https://doi.org/10.1007/s00122-022-04049-4	Qi S, Shen Y, Wang X, Zhang S, Li Y, Islam MM, Wang J, Zhao P, Zhan X, Zhang F, Liang Y	2022	Theor Appl Genet	135	1493–1509	A new NLR gene for resistance to Tomato Spotted Wilt Virus in tomato (Solanum lycopersicum)
404	Resistance to bacterium Xanthomonas	t_R	Rx3			https://doi.org/10.1007/s00122-022-04059-2	Meng G, Xiao Y, Li A, Qian Z, Xie Y, Yang L, Lin H, Yang W	2022	Theor Appl Genet	135	1637–1656	Mapping and characterization of the Rx3 gene for resistance to Xanthomonas euvesicatoria pv. euvesicatoria race T1 in tomato.
405	Yield, maturity			t_QTL	tFW, tFY, tM	https://doi.org/10.1007/s001220050561	Monforte AJ, Asins MJ, Carbonell EA	1997	Theor Appl Genet	95	284-293	Salt tolerance in Lycopersicon species. V. Does genetic variability at quantitative trait loci affect their analysis?
406	Yield			t_QTL	tFW *	https://doi.org/10.1073/pnas.1307313110	Chakrabarti M, Zhang N, Sauvage C, Muños S, Blanca J, Cañizares J, Diez MJ, Schneider R, Mazourek M, McClead J, Causse M, van der Knaap E	2013	Proc Natl Acad Sci	110	17125–17130	A cytochrome P450 regulates a domestication trait in cultivated tomato.
407	Yield			t_QTL	tFW	https://doi.org/10.1007/s00122-012-1832-8	Zhang N, Brewer MT, van der Knaap E	2012	Theor Appl Genet	125	273–284	Fine mapping of fw3.2 controlling fruit weight in tomato.
408	Yield, sugars, maturity			t_QTL	tFW, tSS, tM	https://doi.org/10.1007/s11032-011-9643-1	Ashrafi H, Kinkade MP, Merk HL, Foolad MR	2012	Mol Breed	30	549–567	Identification of novel quantitative trait loci for increased lycopene content and other fruit quality traits in a tomato recombinant inbred line population.
409	Yield			t_QTL	tFW	https://doi.org/10.1007/s00122-003-1224-1	Van der Knaap E, Tanksley S	2003	Theor Appl Genet	107	139-147	The making of a bell pepper-shaped tomato fruit: identification of loci controlling fruit morphology in Yellow Stuffer tomato.
410	Yield			t_QTL	tFW	https://doi.org/10.1007/s00122-011-1599-3	Huang Z, van der Knaap E	2011	Theor Appl Genet	123	465-474	Tomato fruit weight 11.3 maps close to fasciated on the bottom of chromosome 11.
411	Resistance to fungus Cladosporium	t_R	Cf-6			https://doi.org/10.1134/S1022795407110099	Grushetskaya ZE, Lemesh VA, Poliksenova VD, Khotyleva LV	2007	Russ J Genet	43	1266-1270	Mapping of the Cf-6 tomato leaf mould resistance locus using SSR markers
412	Resistance to fungus Cladosporium	t_R	Cf-6			https://doi.org/10.21273/HORTSCI.42.1.11	Wang A, Meng F, Xu X, Wang Y, Jingfu Li	2007	Hort Science	42	11-15	Development of molecular markers linked to Cladosporium fulvum resistant gene Cf-6 in tomato by RAPD and SSR methods
413	Resistance to virus TYLCV	pe_R	Pepy-2			https://doi.org/10.1007/s00122-022-04125-9	Koeda S, Mori N, Horiuchi R, Watanabe C, Nagano AJ, Shiragane H	2022	Theor Appl Genet	135	2437–2452	PepYLCIV and PepYLCAV resistance gene Pepy-2 encodes DFDGD-Class RNA-dependent RNA polymerase in Capsicum.
414	Yield, sugars			t_QTL	tFW, tSS	doi: 10.1093/genetics/127.1.181	Paterson AH, Damon S, Hewitt JD, Zamir D, Rabinowitch HD, Lincoln SE, Lander ES, Tanksley SD.	1991	Genetics	127	181-197	Mendelian factors underlying quantitative traits in tomato: comparison across species, generations, and environments.
415	Resistance to fungus Stemphylium	t_R	Sm			doi:10.1007/s00122-018-3242-z	Su X, Chu G, Huang Z, Wang X, Guo Y, Li B, Du Y, Yang W, Gao J	2019	Theor Appl Genet	132	871–882	Fine mapping and molecular marker development of the Sm gene conferring resistance to gray leaf spot (Stemphylium spp.) in tomato
416	Resistance to fungus Fusarium	t_R	Frl			https://doi.org/10.1007/s00122-015-2547-4	Mutlu N, Demirelli A, Ilbi H, Ikten C	2015	Theor Appl Genet	128	1791–1798	Development of co-dominant SCAR markers linked to resistant gene against the Fusarium oxysporum f. sp. radicis-lycopersici.
417	Resistance to fungus Fusarium	t_R	Frl			https://doi.org/10.5897/AJB11.1520	Truong HTH, Choi HS, Cho MC, Lee HE	2011	African J Biotechn	10	11130-11136	Conversion of the random amplified polymorphic DNA (RAPD) marker UBC#116 linked to Fusarium crown and root rot resistance gene (Frl) into a co-dominant sequence characterized amplified region (SCAR) marker for marker-assisted selection of tomato
418	Resistance to Phytophthora	t_QRL	Ph-2			doi:10.1094/PDIS-03-19-0679-RE	Zhi X, Shu J, Zheng Z, Li T, Sun X, Bai J, Cui Y, Wang X, Huang Z, Guo Y, Du Y, Yang Y, Liu L, Li J	2021	Plant Disease	105	851-858	Fine mapping of the Ph-2 gene conferring resistance to late blight (Phytophthora infestans) in tomato
419	Resistance to bacterium Xanthomonas	t_R	Rx3			doi:10.21273/JASHS.130.5.716	Yang WC, Francis DM	2005	J. Amer. Soc . Hort. Sci	130	716 - 721	Marker-assisted selection for combining resistance to bacterial spot and bacterial speck in tomato.
420	Resistance to bacterium Xanthomonas	t_R	RXopJ4			https://doi.org/10.1007/s00122-012-2004-6	Sharlach M, Dahlbeck D, Liu L, Chiu J, Jimenez-Gomez JM, Kimura S, Koenig D, Maloof JN, Sinha N, Minsavage GV, Jones JB, Stall RE, Staskawicz BJ	2013	Theor Appl Genet	126	601–609	Fine genetic mapping of RXopJ4, a bacterial spot disease resistance locus from Solanum pennellii LA716.
421	Resistance to Phytophthora	p_R	Rpi-amr1			doi.org/10.1038/s41477-021-00854-9	Witek K, Lin X, Karki HS, Jupe F, Witel AI, Steuernagel B, Stam R, van Oosterhout C, Fairhead S, Heal R, Cocker JM, Bhanvadia S, Barrett W, Wu C-H, Adachi H, Song T, Kamoun S, Vleeshouwers VGAA, Tomlinson L, Wulff BBH, Jones JDG	2021	Nature Plants	7	198–208	A complex resistance locus in Solanum americanum recognizes a conserved Phytophthora effector.
422	Resistance to Phytophthora	p_R	Rpi-amr3			DOI: 10.1016/j.molp.2022.07.012	Lin X, Olave-Achury A, Heal R, Pais M, Witek K, Ahn H-K, Zhao H, Bhanvadia S, Karki HS, Song T, Wu C-H, Adachi H, Kamoun S, Vleeshouwers VGAA, Jones JDG	2022	Molecular Plant	15	1457–1469	A potato late blight resistance gene protects against multiple Phytophthora species by recognizing a broadly conserved RXLR-WY effector
