# Supplementary material for: A physical map of traits of agronomic importance based on potato and tomato genome sequences
Source: Front Genet. 2023 Jul 25;14:1197206. doi: 10.3389/fgene.2023.1197206 (PMC10411547; doi:10.3389/fgene.2023.1197206)
Supplement: Supplementary file 5 [file Table6.XLSX]

## Sheet: Chromosome 6
Markers included in Figure 6 are labelled with *	Colour codes: Bright green: Resistance to oomycete (Phytophthora). Dull green: Resistance to fungus. Purple: Resistance to bacterium. Blue: Resistance to virus. Magenta: Resistance to nematode. Red: Resistance to insect. Orange: QTL for sugar content. Yellow: QTL für yield. Maroon: QTL for maturity.				Green: Candidate genes for QRL. Yellow: Candidate genes for yield. Blue: Central metabolism genes. Orange: Carbohydrate metabolism genes, candidate genes for sugar content.			Tomato mapping population: Tomato-EXPEN 1992 (Sl_VF36xLA716), Tanksley et al. (1992) Genetics 132, 1141-1160		Potato mapping population: Potato TxB 1992 (N263), Bonierbale et al. (1988) Genetics 120, 1095-1103		Potato mapping population: Ghislain et al. (2009) Mol. Breed. 23, 377-388		Potato mapping population: Feingold et al. (2005) Theor. Appl. Genet. 111, 456-466		Potato mapping population: F1840, Gebhardt et al. (1991) Theor. Appl. Genet. 83, 49-57		Potato mapping population: BC9162, Gebhardt et al. (1989) Theor. Appl. Genet. 78, 65-75		Identical genes matching to different markers or loci are indicated with #	Identical genes matching to different markers or loci are indicated with #	Colour codes as in columns B and C. Inversions and translocations are framed in black	Differences of physical marker order of version v4.03 versus v6.1 are indicated by red letters. Colour codes as in columns B and C.	Colour codes as in columns B and C. Inversions and translocations are framed in black	Identical genes matching to different markers or loci are indicated with #
Chromosome	Marker or gene, mapped directly by sequence alignment	R gene, QRL or QTL, mapped indirectly by sequence alignment of linked, associated and flanking markers	Origin of marker or trait	Numerical codes of references (see Table S15)	Marker or locus description	Marker or locus category	Sequence source: Accession(s), database, reference	Marker	Marker position [cM]	Marker	Marker position [cM]	Marker	Marker position [cM]	Marker	Marker position [cM]	Marker	Marker position [cM]	Marker	Marker position [cM]	Potato locus (DM1-3 v4.03)	Potato locus (DM1-3 v6.1)	Potato position chr06 (DM1-3 v6.1) [bp]	Potato position chr06 (DM1-3 v4.03) [bp]	Tomato position (SL4.0chr06) [bp]	Tomato locus (SL4.0chr06)
6	PSTR-g		S. spegazzinii	5,6,8,16	Potato subtelomeric repeat	STS (sequence-tagged-site)												PSTR-g	0			no matching position	no matching position	no matching position
6	TG18		S. tuberosum	19,218	Tomato STS marker	STS (sequence-tagged-site)	TG18, SGN	TG18	14.4	TG18	8,5	TG18	0									no matching position (chr09)	no matching position (chr09)	no matching position (chr09)
6*	P1a1 (KAP)		S. tuberosum	52	Potato EST marker (Importin-alpha, KAP)	EST (expressed sequence tag)	AJ487391, NCBI									P1a1	7			# PGSC0003DMG400007289	# Soltu.DM.06G000080	00444258..440930	00100300..106800	03709175..3712241	# Solyc06g009750
6	solcap_snp_c2_43963		S. tuberosum	253,360	Potato SNP marker (Importin subunit alpha), linked to potato QTL for tuber weight, differential SNP allele frequency between pairs of potato genotype pools with differential tuber yield content	SNP (single nucleotide polymorphism)	Spud DB, http://solcap.msu.edu/potato													# PGSC0003DMG400007289	# Soltu.DM.06G000080	00444180..444280	00106468..106568	03709253..3709153	# Solyc06g009750
6	DMG400007286 (CP12.1, solcap_snp_c2_54011)		S. tuberosum	253	Chloroplast protein 12 (CP12.1), gene with differential SNP allele frequency between pairs of potato genotype pools with differential tuber yield, candidate gene for potato tuber yield QTL, associated with potato tuber yield	Gene	Spud DB, SGN													PGSC0003DMG400007286	Soltu.DM.06G000150	00529847..529202	00195060..195710	03587247..3587854	Solyc06g009630
6	solcap_snp_c2_54010		S. tuberosum	247	Potato SNP marker linked to QRL RSe-VIb	SNP (single nucleotide polymorphism)	Spud DB, http://solcap.msu.edu/potato													not annotated	# Soltu.DM.06G000220	00560167..560267	00226727..226748	03534687..3534587	# Solyc06g009530
6	solcap_snp_c1_15726		S. tuberosum	247	Potato SNP marker linked to QRL RSe-VIb	SNP (single nucleotide polymorphism)	Spud DB, http://solcap.msu.edu/potato													not annotated	# Soltu.DM.06G000220	00572383..572483	00238848..238869	03522102..3522002	# Solyc06g009530
6	GP317		S. tuberosum	8	Potato STS marker (Protein phosphatase 2C like)	STS (sequence-tagged-site)	CG783244, NCBI											GP317-b	2	# PGSC0003DMG400007297	# Soltu.DM.06G000330	00646609..647271	00310800..315430	03316172..3315378	# Solyc06g009390
6	solcap_snp_c2_30632		S. tuberosum	253,360	Potato SNP marker (Protein phosphatase-2C), differential SNP allele frequency between pairs of potato genotype pools with differential tuber yield, SNP causing amino acid change	SNP (single nucleotide polymorphism)	Spud DB, http://solcap.msu.edu/potato													# PGSC0003DMG400007297	# Soltu.DM.06G000330	00647053..646953	00314675..314696	03315596..3315696	# Solyc06g009390
6	solcap_snp_c1_9224		S. tuberosum	247,360	Potato SNP marker (Isoamylase isoform 3), linked to potato QRL RSe-VIb and QTL for tuber weight	SNP (single nucleotide polymorphism)	Spud DB, http://solcap.msu.edu/potato													# PGSC0003DMG402007274	# Soltu.DM.06G000410	00700527..700627	00368257..368278	03200747..3200650	not annotated
6	DBE-6/1		S. tuberosum	235	Isoamylase isoform 3, debranching enzyme (EC3.2.1.41), starch metabolism, functional candidate gene for potato tuber starch and sugar content QTL	Gene	BD080224, NCBI													# PGSC0003DMG402007274	# Soltu.DM.06G000410	00700317..704425	00368200..374700	03160374..3183729	# Solyc06g009220
6	DBE-6/2		S. tuberosum	235	Isoamylase isoform 3, debranching enzyme (EC3.2.1.41), starch metabolism, functional candidate gene for potato tuber starch and sugar content QTL	Gene	BD080224, NCBI													# PGSC0003DMG401007274	# Soltu.DM.06G000420	00730717..730461	00375900..383000	03200639..3200841	not annotated
6	solcap_snp_c1_9229		S. tuberosum	247	Potato SNP marker, linked to potato QRL RSe-VIb	SNP (single nucleotide polymorphism)	Spud DB, http://solcap.msu.edu/potato													# PGSC0003DMG401007274	# Soltu.DM.06G000420	00730481..730581	00398122..398143	03158766..3158666	# Solyc06g009220
6	EST253712		S. lycopersicum	47	Tomato microsatellite marker, associated with tomato fruit weight	EST (expressed sequence tag)	Ref. 389															no matching position	no matching position	03138813..3138690	# Solyc06g009190
6	solcap_snp_c2_30509		S. tuberosum	247	Potato SNP marker (Pectinesterase), linked to potato QRL RSe-VIb	SNP (single nucleotide polymorphism)	Spud DB, http://solcap.msu.edu/potato													PGSC0003DMG402017934	Soltu.DM.06G000430	00742825..742925	00410461..410482	03138305..3138205	# Solyc06g009190
6	TG436		S. lycopersicum	19	Tomato STS marker	STS (sequence-tagged-site)	TG436, SGN	TG436	10											not annotated	Soltu.DM.06G000510	00854211..853658	00516369..515816	03015635..3016185	Solyc06g009070
6	SSR48		S. lycopersicum	411	Tomato microsatellite marker, flanking tomato gene Cf-6 for resistance to C. fulvum	SSR (simple sequence repeat)	SSR48, SGN													PGSC0003DMG400014637	Soltu.DM.06G000680	00993387..993560	00661435..661608	02851396..2851220	Solyc06g008910
6		RSe-VIb	S. tuberosum	247	Potato QTL for resistance to Synchitrium endobioticum (potato wart)	QRL (quantitative resistance locus)																0 - 1 Mbp	0 - 1 Mbp
6		Ol-4, Ol-6	S. peruvianum	349,350,351	Tomato genes for resistance to Oidium neolycopersici	R gene																		2 - 3 Mbp
6	Pvr9		C. annuum	398	Pepper gene for resistance to potyvirus (Pepper Mottle Virus)	R gene	KM590984, NCBI													PGSC0003DMG400025511(a), PGSC0003DMG400021986(b), PGSC0003DMG400025512(c), PGSC0003DMG401005337(d)	# Soltu.DM.06G000800(a), Soltu.DM.06G001370(b), Soltu.DM.06G001360(c), Soltu.DM.06G000810(d)	01120507..1116907(a), 01831781..1834848(b), 01825836..1828933(c), 01130474..1127363(d) et al.	01555436..1558503(a), 00854544..851434(b), 01547848..1550960(c), 01168506..1165443(d) et al.	02751016..2754196(a), 02709818..2712986(b), 02370347..2367197(c), 02729021..2732204(d)	# Solyc06g008785(a), # Solyc06g008765(b), not annotated(c,d)
6*	Mi/Meu, Mi-9		S. peruvianum	9,10,11,12,13,15,113,114,115,116,171,253,292	Tomato gene for resistance to Meloidogyne incognita (nematode) and Macrosiphum euphorbiae (aphid), differential SNP allele frequency between pairs of potato genotype pools with differential tuber yield, SNPs causing amino acid changes, candidate gene for potato tuber yield QTL	R gene	AF039682, NCBI													# PGSC0003DMG400031878(a), PGSC0003DMG400025512(b)	# Soltu.DM.06G000950(a), Soltu.DM.06G000810(b)	01358036..1354236(a), 01131073..1127366(b) et al.	00925817..922203(a), 1547210..1550959(b) et al.	02750363..2754193(a), 02371027..2367200(b), 02709177..2712983(c), 02343703..2339876(d) et al.	# Solyc06g008785(a), not annotated(b), Solyc06g008765(c), # Solyc06g008368(d)
6	Rpi-blb2		S. bulbocastanum	168	Potato R gene for resistance to Phytophthora infestans	R gene	DQ122125, NCBI													# PGSC0003DMG400031878(a), PGSC0003DMG400021986(b), PGSC0003DMG400020732(c)	# Soltu.DM.06G000810(a), Soltu.DM.06G000950(b), Soltu.DM.06G001360(c)	01131070..1127366(a), 01358033..1354236(b), 01825201..1828932(c) et al.	00926100..922063(a), 00854570..851329(b), 00971507..968253(c) et al.	02750363..2754193(a), 02371027..2367200(b), 2728380..2732201(c) et al.	# Solyc06g008785(a), not annotated(b,c)
6		pLBR6.1	S. tuberosum, S. microdontum	3,9,10,17,67,227	Potato QTL for resistance to late blight	QRL (quantitative resistance locus)																0 - 3 Mbp	0 - 3 Mbp
6		pM6.1	S. tuberosum	3	Potato QTL for plant maturity	QTL (quantitative trait locus)																0 - 7 Mbp	0 - 7 Mbp
6		pTW6.1	S. tuberosum	360	Potato QTL for tuber weight	QTL (quantitative trait locus)																0 - 2 Mbp	0 - 2 Mbp
6		pTY6.1	S. tuberosum	253	Potato QTL for tuber yield	QTL (quantitative trait locus)																0 - 2 Mpb	0 - 2 Mpb
6	At2B05 (AT5G65670)		A. thaliana	52,55	Arabidopsis EST marker (Auxin induced genes 8, 9, 14)	EST (expressed sequence tag)	U18406, NCBI; AT5G65670, TAIR									At2B5-c	4.002			PGSC0003DMG400005327	Soltu.DM.06G001120	01568551..1569228	01328650..1324980	02510790.. 2513892	Solyc06g008590
6	DMG400025511		S. tuberosum	253	Plant resistance protein, gene with differential SNP allele frequency between pairs of potato genotype pools with differential tuber yield, SNPs causing amino acid changes, candidate gene for potato tuber yield QTL	Gene	Spud DB, SGN													PGSC0003DMG400025511	Soltu.DM.06G001370	01831179..1834917	01554500..1559900	02343353..2339923(a), 02709866..2712930(b) et al.	Solyc06g008368 & Solyc06g008390(a), Solyc06g008765(b)
6	CT119		S. lycopersicum	19,168,185,218,227,242,351	Tomato EST marker, on tomato IL6-1, linked to potato R gene Rpi-blb2 and late blight QRL, flanking tomato R gene Ol-4	EST (expressed sequence tag)	AA824824, NCBI	CT119	5.6	CT119	0	CT119	14	CT119	0					PGSC0003DMG401025508 & PGSC0003DMG402025508	Soltu.DM.06G001420	01913807..1914222	01641710..1642910	02203010..2202588	Solyc06g008320
6	Cf-2		S. pimpinellifolium	9,10,13,32,69,110,111	Tomato gene for resistance to Cladosporium fulvum from L. pimpinellifolium	R gene	U42444, NCBI													PGSC0003DMG400039627	# Soltu.DM.06G001590	02071417..2074236 et al.	chr00	02173714..2170796 et al.	# Solyc06g008300
6	Cf-5		S. pimpinellifolium	9,10,13,32,69,110,111	Tomato gene for resistance to Cladosporium fulvum from L. pimpinellifolium	R gene	U42445, NCBI													PGSC0003DMG400014717	# Soltu.DM.06G001590	02071417..2074236 et al.	01768340..1773050	02173714..2170796 et al.	# Solyc06g008300
6		Cf-6	S. lycopersicum	411,412	Tomato gene for resistance to Cladosporium fulvum	R gene																		2 - 4 Mbp
6	2-2C		S. lycopersicum	411	Tomato STS marker, linked to tomato gene Cf-6 for resistance to C. fulvum	STS (sequence-tagged-site)	Ref. 411															no matching position	no matching position	02173202..2173185	# Solyc06g008300
6	solcap_snp_c2_53250		S. tuberosum	253,360	Potato SNP marker (Calmodulin binding protein), proximal to potato QTL for tuber weight, gene with differential SNP allele frequency between pairs of potato genotype pools with differential tuber yield, SNPs causing amino acid changes, candidate gene for potato tuber yield QTL	SNP (single nucleotide polymorphism)	Spud DB, http://solcap.msu.edu/potato													PGSC0003DMG400014715	Soltu.DM.06G001950	02343673..2343771	01801576..1801674	02115732..2115632	Solyc06g008230
6*	GP79		S. tuberosum	1,3,4,6,7,8,9,11,12,13,15,16,17,18,19,20,32,52,59,212,350	Potato STS marker, linked with Cf-2, Cf-5, Mi/Meu and Ol-1, linked with potato QTL for resistance to late blight, tuber sugar content and yield	STS (sequence-tagged-site)	AJ492261 & AJ492262, NCBI	GP79	5.6	GP79	0					GP79	4.001	GP79	3	intergenic	intergenic	02440299..2441197	01911114..1909747	02016588..2016854	Solyc06g008120
6	Solyc06g007830		S. lycopersicum	337	Tomato candidate gene (Auxin signaling F-box 1 ) for tomato QTL for soluble solids content (Brix) (tSS6.1), associated with tomato soluble solids content	Gene	Solyc06g007830, SGN													PGSC0003DMG400003405	Soltu.DM.06G002290	02726228.. 2726368	02282759..2282899	01764417..1764073	Solyc06g007830
6	St_At3g25120		S. tuberosum	212	Potato ortholog to Sl_At3g25120 (mitochondrial import inner membrane translocase subunit )	COS (conserved orthologous sequence)	At3g25120, TAIR									St_At3g25120	6			PGSC0003DMG400022033	Soltu.DM.06G002350	02782364..2778833	02377300..2384600	01755490..1760889	Solyc06g007800
6	Cyt-c red 10kD		S. tuberosum	8	Cytochrom c reductase, 10 kD subunit	Gene	X79275, NCBI											Cyt-c red 10kD-a	4.001	PGSC0003DMG400020649	Soltu.DM.06G002610	03011363..3015779	02713640..2718270	01541553..1537390	Solyc06g007540
6		pTSC6.1 (Sug6b, CIS_E_06-1)	S. tuberosum, S. berthaultii	59,355	Potato QTL for tuber sugar content (cold-induced sweetening)	QTL (quantitative trait locus)																~ 1 - 4 Mbp	~ 1 - 4 Mbp
6		tSS6.1 (ssc6.1, brx6.1)	S. lycopersicum, S. cheesmanii, S. habrochaites (L. hirsutum), S. parviflorum	308,312,314,337	Tomato QTL for soluble solids (Brix)	QTL (quantitative trait locus																		0 - 3 Mbp
6		pTY6.2 (yi-d)	S. tuberosum	18,219,253	Potato QTL for tuber yield	QTL (quantitative trait locus																3 - 9 Mbp	3 - 9 Mbp
6		tFW6.1 (fw6.1)	S. lycopersicum, S. cheesmanii, S. parviflorum	47,308,314	Tomato QTL for fruit weight	QTL (quantitative trait locus																		0 - 3 Mbp
6	At1B07 (AT1G14320)		A. thaliana	52.55	Arabidopsis EST marker (Ribosomal protein L10, Wilm's tumor supressor)	EST (expressed sequence tag)	T76209, NCBI; AT1G14320, TAIR									At1B7-a	0			PGSC0003DMG400002405	Soltu.DM.06G002700	03078465..3077965	02745860..2747250	01529870..1530370	Solyc06g007520
6	P1f3		S. tuberosum	52.55	Potato EST marker (Ubiquitin conjugating enzyme, EC6.3.2.19)	EST (expressed sequence tag)	AJ487403, NCBI									P1f3-a	3			PGSC0003DMG400020569	Soltu.DM.06G002740	03111050..3112299	02791460..2795660	01519792..1518089	Solyc06g007510
6	St_At1g07080		S. tuberosum	212	Potato ortholog of Sl_At1g07080 (Thioredoxin superfamily protein)	COS (conserved orthologous sequence)	At1g07080, TAIR									St_At1g07080	72.004			PGSC0003DMG400020559(b), PGSC0003DMG400034612(a)	Soltu.DM.06G002900(a), not annotated(b)	03310392..3317427(a), 57186204..57185684(b)	03006182..3013217(b), 57430336..57429816(a)	01369794..1369474(a), 01377413..1375891(b)	Solyc06g007330(a), Solyc06g007340(b)
6	AspS		S. tuberosum	293	Asparagine synthase, in potato differential expression between quantitative late blight resistant and susceptible genotype pools and upon infection with P. infestans, functional candidate gene for late blight QRL, linked with potato late blight QRL (MCR, rAUDPC)	Gene	Spud DB, SGN													PGSC0003DMG400004170	Soltu.DM.06G003070	03508436..3511315	03211800..3217000	01255407..1252686	Solyc06g007180
6	solcap_snp_c2_27564		S. tuberosum	253	Potato SNP marker, differential SNP allele frequency between pairs of potato genotype pools with differential tuber yield	SNP (single nucleotide polymorphism)	Spud DB, http://solcap.msu.edu/potato													PGSC0003DMG400004151	Soltu.DM.06G003240	03759048..3758948	03470374..3470395	01124231..1124331	Solyc06g006080
6	CT216		S. lycopersicum	149,308,312,314,408	Tomato EST marker, linked to tomato QRL for late blight, linked to tomato QTL for soluble solids (Brix) and fruit weight, distal to tomato QTL tSS6.2 for fruit soluble solids (Brix)	EST (expressed sequence tag)	CT216	CT216	7											PGSC0003DMG400002153	Soltu.DM.06G003960	04705319..4705834	04472300..4474100	00729254..730480	Solyc06g005650
6*	GP164		S. tuberosum	6,7,8,223	Potato STS marker (Putative DNA binding protein, MYB transcription factor), flanking potato QRL for late blight, linked to potato QTL for plant maturity	STS (sequence-tagged-site)	CG783094, NCBI											GP164	4.003	PGSC0003DMG400002138	Soltu.DM.06G004060	04917167..4918101	04700840..4704890	00653244..652308	Solyc06g005590
6	solcap_snp_c2_36712		S. tuberosum	374	Potato SNP marker, flanking potato QTL for tuber sugar content (cold induced sweetening)	SNP (single nucleotide polymorphism)	Spud DB, http://solcap.msu.edu/potato													PGSC0003DMG400003469	Soltu.DM.06G004410	05921414..5921514	05849802..5849902	00403681..403581	Solyc06g005370
6	GP249		S. tuberosum	7,8	Retroelement, reverse transcriptase	STS (sequence-tagged-site)	CG783182, NCBI											GP249-a	9			multiple positions	multiple positions	multiple positions
6	St3.3.13		S. tuberosum	9,13,23,52,55	Potato resistance gene like (RGL) sequence, linked to potato QRL Eca6A	RGL sequence (resistance-gene-like)	U60084, NCBI									St3.3.13-c	10.001			PGSC0003DMG401012062	not annotated(a), Soltu.DM.06G004980(b)	06555867..6556311(a), 07358686..7358242(b) et al.	06587110..6589370	no matching position
6		Eca6A	S. tuberosum	9.23	Potato QTL for tuber resistance to Erwinia carotovora ssp atroseptica	QRL (quantitative resistance locus)																~ 4 - 8 Mbp	~ 4 - 8 Mbp
6	BA41b2T7		S. tuberosum	53	T7 end of potato BAC selected with resistance gene like (RGL) probe St3.3.13	STS (sequence-tagged-site)	CG783043, NCBI													intergenic(a,b)	intergenic(a,b)	07076670..7077296(a), 07158599..7158599(b) et al.	06744838..6745462(a), 06681483..6682108(b) et al.	21908197..21908800 et al.	intergenic
6*	BA71g1T3		S. tuberosum	53	T3 end of potato BAC selected with resistance gene like (RGL) probe St3.3.13	STS (sequence-tagged-site)	CG783066, NCBI													intergenic(a,b)	intergenic(a,b)	07226758..7227407(a), 06860168..6860817(b) et al.	06732611..6733260(a), 06746899..6747537(b)	00243531..243919(a), 00245208..244833(b) et al.	intergenic(a,b)
6	BA34j14T7		S. tuberosum	53	T7 end of potato BAC selected with resistance gene like (RGL) probe St3.3.13	STS (sequence-tagged-site)	CG783040, NCBI													intergenic(a,b)	intergenic(a,b)	07346284..7346696(a), 06695975..6696380(b) et al.	06851630..6852042	no matching position (chr11)
6	STM0001		S. tuberosum	3,16,219	Potato microsatellite marker, linked to potato QTL for late blight resistance , plant maturity and vigour, associated with potato tuber yield	SSR (simple sequence repeat)	Ref. 16									STM0001	9			intergenic(a,b)	intergenic(a,b)	07464749..7464731(a), 07493663..7493645(b)	06971700..6971682(a), 07005884..7005866(b)	no sequence homology
6	GP316		S. tuberosum	8	Potato STS marker	STS (sequence-tagged-site)	CG783243, NCBI											GP316-c	10			no matching position(chr08)	no matching position(chr08)	no matching position
6	BA1m23t3		S. tuberosum	53	T3 end of potato BAC selected with RGL of BAC BA47f2	STS (sequence-tagged-site)	CG783023, NCBI									BA1m23	10.008					no matching position (chr04)	no matching position (chr04)	no matching position (chr04)
6*	DMG400041768		S. tuberosum	253	Gene of unknown function, with differential SNP allele frequency between pairs of potato genotype pools with differential tuber yield, SNP causing amino acid change, candidate gene for potato tuber yield QTL	Gene	Spud DB, SGN													PGSC0003DMG400041768	not annotated	08625466..8623845	08213000..8214620	15970177..15970003	not annotated
6*	S1g2		S. tuberosum	52,55	Potato EST marker (Elongation factor 1-a)	EST (expressed sequence tag)	AJ489126, NCBI									S1g2-a	11.003			PGSC0003DMG400020772(a), PGSC0003DMG400023270(b), PGSC0003DMG400023272(c), PGSC0003DMG400020775(d)	Soltu.DM.06G005620(a), Soltu.DM.06G005680(b), Soltu.DM.06G005660(c), Soltu.DM.06G005580(d)	09286865..9286290(a), 09362473..9363056(b), 09140159..9140739(c), 09147797..9147217(d)	08900341..8900924(a), 08687736..8688316(b), 08695350..8694770(c), 08823500..8822920(d)	04370974..4370397(a), 04391987..4392570(b), 00057554..58134(c)	Solyc06g009960(a), Solyc06g009970(b), Solyc06g005060(c)
6*	Solyc06g048580		S. lycopersicum	296	Tomato gene flanking tomato QRL Bwr-6	Gene	SGN													not annotated	not annotated	13535324..13534815	13194970..13194810	28979439..28981707	Solyc06g048580
6	S1a8		S. tuberosum	52.55	Potato EST marker (Nuclear RNA helicase)	EST (expressed sequence tag)	AJ489103, NCBI									S1a8-b	11.001			not annotated	Soltu.DM.06G006910	15334258..15334648	13908634..13908876	no matching position
6	DMG400035335		S. tuberosum	253	Conserved gene of unknown function, with differential SNP allele frequency between pairs of potato genotype pools with differential tuber yield, SNP causing amino acid change, candidate gene for potato tuber yield QTL	Gene	Spud DB, SGN													PGSC0003DMG400035335	not annotated	17630025..17625114	16239800..16247200	no matching position
6	At2C09 (AT5G56710)		A. thaliana	52.55	Arabidopsis EST marker (Ribosomal protein L31, RPL31)	EST (expressed sequence tag)	R30337, NCBI; AT5G56710, TAIR									At2C9-b	10.009			not annotated	not annotated	19230597..19245491	17908800..17909110	no matching position
6	TG97		S. lycopersicum	19,123,242	Tomato STS marker, on tomato IL6-1, linked with tomato QRL Ty-1	STS (sequence-tagged-site)	TG97, SGN	TG97	8.6													no matching position	no matching position	27375810..27375301	intergenic
6*	TG274		S. lycopersicum	19,280	Tomato STS marker, flanking tomato QRL for early blight (EB6.1)	STS (sequence-tagged-site)	TG274, SGN	TG274	8.6											PGSC0003DMG400031356	Soltu.DM.06G008000	21504874..21504202	20313729..20313057	25687845..25688505	Solyc06g036780
6	S374		S. lycopersicum	412	Tomato SCAR marker, linked to tomato gene Cf-6 for resistance to C. fulvum	STS (sequence-tagged-site)	Ref. 412															no matching position	no matching position	21015361..21015341	Solyc06g033850
6*	APS1		S. lycopersicum	15.349	Tomato CAPS marker (acid phosphatase 1), linked to tomato R gene Ol-4, flanking tomato Mi locus	STS (sequence-tagged-site)	X55884, NCBI													PGSC0003DMG400021596	Soltu.DM.06G012390	36493789..36496597	35807325..35810112	21434486..21439234	Solyc06g034110
6	St_At5g61510		S. tuberosum	212	Potato ortholog of Sl_At5g61510 (NADP-dependent oxidoreductase)	COS (conserved orthologous sequence)	At5g61510, TAIR									St_At5g61510	12.004			PGSC0003DMG400021595	Soltu.DM.06G012400	36498559..36505031	35812500..35819500	21440293..21447676	Solyc06g034120
6	STM0019		S. tuberosum	3,16,218	Potato microsatellite marker, linked to potato QTL for late blight resistance , plant maturity and vigour	SSR (simple sequence repeat)	Ref. 16													intergenic	intergenic	37078495..37078472	36379408..36379431	no matching position
6*	TG178		S. lycopersicum	19,20,126,271	Tomato STS marker, linked with tomato QRL Cm6.1 and BW-6, linked with tomato resistance gene Ol-1, linked with tomato soluble solids (Brix) QTL	STS (sequence-tagged-site)	TG178, SGN	TG178	8.6											PGSC0003DMG400027958	Soltu.DM.06G012750	37131791..37132249	36434267..36434725	22112109..22112568	Solyc06g035450
6		Cm6.1	S. peruvianum	10.271	Tomato QTL for resistance to Clavibacter michiganensis spp michiganensis	QRL (quantitative resistance locus)																		~ 20 - 24 Mbp
6		tFW6.2 (fw6.1)	S. lycopersicum	332	Tomato QTL for fruit weight	QTL (quantitative trait locus																		21 - 22 Mbp
6	CT21		S. lycopersicum	19,269,270,352	Tomato EST marker, flanking tomato QRL Ol-qtl1	EST (expressed sequence tag)	CT21	CT21	8.6											not annotated	Soltu.DM.06G012850	37352254..37351668	36701537..36704109	22363602..22363016	Solyc06g035580
6	DMG400025283		S. tuberosum	253	Conserved gene of unknown function, with differential SNP allele frequency between pairs of potato genotype pools with differential tuber yield, SNP causing amino acid change, candidate gene for potato tuber yield QTL	Gene	Spud DB, SGN													PGSC0003DMG400025283	Soltu.DM.06G012970	37519944..37517135	36880610..36883840	22579076..22576211	Solyc06g035720
6*	CD67		S. lycopersicum	19,128,255	Tomato EST marker, linked to potato R gene Rpi-ver, linked to tomato QRL BW-6A	EST (expressed sequence tag)	CD67, SGN	CD67	8.6											PGSC0003DMG400025274	Soltu.DM.06G012980	37625067..37624616	37024845..37024413	22672000..22671549	Solyc06g035760
6	TG231		S. lycopersicum	19,69,110,185,218,227,242,298	Tomato STS marker, on tomato IL6-1, linked with tomato R genes Cf-2,Cf-5 and Mi/Meu, linked to potato late blight QRL, flanking potato trichome A density QTL	STS (sequence-tagged-site)	TG231, SGN	TG231	8.6	TG231	10,5	TG231	24	TG231	13					not annotated	Soltu.DM.06G013180	38021136..38020544	37415933..37416467	23215757..23215157	Solyc06g036000
6	STM5119		S. tuberosum	218	Potato microsatellite marker	SSR (simple sequence repeat)	Ref. 218					STM5119	22							PGSC0003DMG401028895	Soltu.DM.06G013510	38447414..38443549	37944629..37944990	23749942..23744891	Solyc06g036340
6*	StSGT1-2		S. tuberosum	165.345	Potato homolog of the Arabidopsis SGT1b gene functional in pathogen defense, functional candidate gene for late blight QRL	Gene	AY615274, NCBI									StSGT1-2	12.003			PGSC0003DMG400028904	Soltu.DM.06G013540	38468495..38473140	37968220..37972860	23817137..23823003	Solyc06g036420
6*	solcap_snp_c2_4589		S. tuberosum	253	Potato SNP marker, differential SNP allele frequency between pairs of potato genotype pools with differential tuber yield	SNP (single nucleotide polymorphism)	Spud DB, http://solcap.msu.edu/potato													PGSC0003DMG400023815	Soltu.DM.06G009010	26163988..26164088	24930721..24930742	33251596..33251556	Solyc06g051800
6	P8d7		S. tuberosum	52.55	Potato EST marker (Cyclophilin ROC7, PPIase, EC 5.2.1.8)	EST (expressed sequence tag)	AJ487449, NCBI									P8d7-b	11.002			PGSC0003DMG400006624	Soltu.DM.06G009250	27583904..27583888	26362100..26367400	32966012..32966197	Solyc06g051650
6	P1f11		S. tuberosum	52.55	Potato EST marker (Ribosomal protein L24, RL24)	EST (expressed sequence tag)	AJ487402, NCBI									P1f11-e	12.002			not annotated	Soltu.DM.06G009490	28522580..28522462	27288297..27288179	no matching position
6*	TG590		S. lycopersicum	19,32,280,308,310	Tomato STS marker, on tomato IL6-1, North of IL6-2 and IL6-2-2, linked to tomato QTL for fruit soluble solids (Brix) and fruit weight, linked to tomato QRL for early blight (EB6.1)	STS (sequence-tagged-site)	TG590, SGN	TG590	19											intergenic	intergenic	29070380..29070085	27813045..27812750	32441850..32442889	Solyc06g051360
6		tSS6.2 (ssc6.1)	S. lycopersicum, S. pimpinellifolium, S. lycopersicum var. cerasiforme	237,310,408	Tomato QTL for fruit soluble solids (Brix) and sugar content	QTL (quantitative trait locus																		30 - 34 Mbp
6		pTSC6.3	S. chacoense	374	Potato QTL for cold induced sweetening (tuber sugar content)	QTL (quantitative trait locus																(6 - 41 Mbp)	(6 - 41 Mbp)
6	P3g6		S. tuberosum	52,55,212	Potato EST marker (GDP-mannose pyrophosphorylase)	EST (expressed sequence tag)	AJ487434, NCBI									P3g6-a	11.004			# PGSC0003DMG400015645	# Soltu.DM.06G009750	29872974..29871795	28620570..28623980	32270773..32271939	# Solyc06g051270
6	TD025-87		S. lycopersicum	237	Tomato SNP marker, associated with tomato fruit soluble solids(Brix) and sugar content	SNP (single nucleotide polymorphism)	Ref.237													# PGSC0003DMG400015645	# Soltu.DM.06G009750	29872878..29872300	28622437..28621859	32270869..32271434	# Solyc06g051270
6	Solyc06g051210		S. lycopersicum	296	Tomato gene, linked to tomato QRL Bwr-6	Gene	SGN													# PGSC0003DMG400015657	# Soltu.DM.06G009830	30095460..30101052	28874386..28879978	32170502..32164776	# Solyc06g051210
6	StI061		S. tuberosum	185	Potato microsatellite marker	SSR (simple sequence repeat)	Ref. 185													# PGSC0003DMG400015657	# Soltu.DM.06G009830	30095520..30095632	28880000..28874400	32170438..32170326	# Solyc06g051210
6	Solyc06g051190		S. lycopersicum	296.289	Tomato gene linked to tomato QRL Bwr-6, part of tomato tomato Ty-1/Ty-3 gene	Gene	SGN													not annotated	# Soltu.DM.06G009870	30119359..30129812	28898462..28908769	32157711..32153469	# Solyc06g051190
6	Ty-1,Ty-3		S. chilense	9,10,13,32,123,289	Tomato alleles of gene for resistance to Tomato Yellow Leaf Curl Virus (TYLCV)	R gene	Solyc06g051190, SGN													not annotated	# Soltu.DM.06G009870	30119359..30129812	28898462..28908769 28899000..28960000	32157711..32153469	# Solyc06g051190
6	Pepy-2		C. annuum	413	Pepper gene for resistance to begomovirus	R gene	XP_016579761, NCBI													PGSC0003DMG400015653 & PGSC0003DMG400015654 & PGSC0003DMG400015663	# Soltu.DM.06G009870 & Soltu.DM.06G009880	30119606..30171554	28898709..28959522	32157457..32129138	# Solyc06g051190
6	TG297		S. lycopersicum	19,32,123	Tomato STS marker, North border of tomato IL6-1, linked with Ty-1	STS (sequence-tagged-site)	TG297, SGN	TG297	0													no matching position (chr01)	no matching position (chr01)	no matching position (chr01)
6	At1A12 (AT3G11940)		A. thaliana	52.55	Arabidopsis EST marker (Ribosomal protein S5, RS5)	EST (expressed sequence tag)	T43530, NCBI; AT3G11940, TAIR									At1A12-b	12.001					no matching position (chr11 & 10)	no matching position (chr11 & 10)	no matching position (chr11 & 10)
6	DMG400044903		S. tuberosum	253	Gene of unknown function, with differential SNP allele frequency between pairs of potato genotype pools with differential tuber yield, SNPs causing amino acid changes, candidate gene for potato tuber yield QTL	Gene	Spud DB, SGN													PGSC0003DMG400044903	not annotated	31137372..31137531	30164738..30165155	no matching position(chr01)
6	Solyc06g051150		S. lycopersicum	296	Tomato gene, linked to tomato QRL Bwr-6	Gene	SGN															no matching position(chr03)	no matching position(chr03)	32059144..32059652	Solyc06g051150
6	Solyc06g051140		S. lycopersicum	296	Tomato gene, linked to tomato QRL Bwr-6	Gene	SGN															no matching position (chr01)	no matching position (chr01)	32058739..32053077(a), 02355542..2360275(b)	Solyc06g051140
6	Solyc06g051110		S. lycopersicum	296	Tomato gene, linked to tomato QRL Bwr-6	Gene	SGN															no matching position	no matching position	31982124..31981648	Solyc06g051110
6	solcap_snp_sl_2629		S. lycopersicum	339	Tomato SNP marker, associated with tomato QRL against Xanthomonas sp.	SNP (single nucleotide polymorphism)	sl_2629, SGN													PGSC0003DMG400017893	Soltu.DM.06G010550	31761985..31762085	30818132..30818232	31284224..31284324	Solyc06g050770
6*	GP506		S. tuberosum	6,13,52	Potato STS marker (receptor kinase like, BRI1)	STS (sequence-tagged-site)	AJ487362, NCBI									GP506	13.001			PGSC0003DMG400023953	Soltu.DM.06G010350	31416440..31415839	30443600..30446540	30992411..30991823	Solyc06g050560
6	GP136		S. tuberosum	6,7,8	Potato STS marker	STS (sequence-tagged-site)	CG783091 & CG783090, NCBI											GP136-b	13	not annotated	Soltu.DM.06G010620	32004341..32003069	31100113..31100456	no matching position
6*	solcap_snp_sl_2622		S. lycopersicum	339	Tomato SNP marker, flanking tomato QRL against Xanthomonas sp.	SNP (single nucleotide polymorphism)	sl_2622, SGN													PGSC0003DMG400029079	Soltu.DM.06G010820	32504169..32504069	31630859..31630759	30689084..30689184	Solyc06g050350
6	St_At3g10920		S. tuberosum	212	Potato ortholog of Sl_At3g10920 (manganese superoxide dismutase (MSD1) )	COS (conserved orthologous sequence)	At3g10920, TAIR									St_At3g10920	13.002			PGSC0003DMG400016647	Soltu.DM.06G011380	34524011..34522560	33726750..33729780	30048323..30049841	Solyc06g049080
6*	GP202		S. tuberosum	6,7,8,18	Potato STS marker, linked to potato QTL for tuber yield	STS (sequence-tagged-site)	CG783142 & CG783143, NCBI											GP202	8	PGSC0003DMG400016657	Soltu.DM.06G011660	35105752..35104894	34311160..34315130	29599199..29600045	Solyc06g048890
6	GP102		S. tuberosum	6,7,8	Potato STS marker (Polynucleotide phosphorylase like)	STS (sequence-tagged-site)	CG783079 & CG783078, NCBI											GP102	15	PGSC0003DMG400006644	Soltu.DM.06G011720	35240919..35240492	34555139..34554712	no matching position(chr02)
6	WUN1		S. tuberosum	6,7,8,9,59,118,385	Potato wound induced gene, expression in potato up regulated upon infection with P. infestans, functional candidate gene for QRL	Gene	A12164, NCBI											WUN1	11	# PGSC0003DMG400006643	# Soltu.DM.06G011750	35341504..35339461	34654430..34655070	29470263..29471422	# Solyc06g048820
6	STM1050		S. tuberosum	16	Potato microsatellite marker	SSR (simple sequence repeat)	A12164, NCBI													# PGSC0003DMG400006643	# Soltu.DM.06G011750	35341504..35339461	34654430..34655070	29470263..29471422	# Solyc06g048820
6	St_At1g55670		S. tuberosum	212	Potato ortholog of Sl_At1g55670 (subunit G of photosystem I, 11-kDa membrane protein, important role in electron transport)	COS2 (conserved orthologous sequence)	At1g55670, TAIR									St_At1g55670-b	12.005			not annotated	not annotated(a), Soltu.DM.06G011780(b)	35489886..35490209(a), 35398998..35399277(b)	34713407..34713451	no matching position(chr07)
6*	By-4		S. lycopersicum	349	Tomato CAPS marker, linked to tomato R gene Ol-4	STS (sequence-tagged-site)	Ref. 349													not annotated	Soltu.DM.06G012130	35938253..35938233	35227678..35227659	28775590..28775612	Solyc06g048460
6		Rpi-ver	S. verrucosum	255	Potato gene for resistance to P. infestans (late blight) from S. verrucosum	R gene																36 - 38 Mbp	36 - 38 Mbp
6		tLBR6.1 (lb6a)	S. lycopersicum, S. habrochaites (L. hirsutum)	149	Tomato QTL for resistance to late blight	QRL (quantitative resistance locus)																		(0 - 39 Mbp)
6		rx6.1	S. lycopersicum	339	Tomato QTL for resistance to Xanthomonas sp. (bacterial spot)	QRL (quantitative resistance locus)																		31 - 34,6 Mbp
6		tBWR6.1 (Bwr-6, BW-6A)	S. lycopersicum	40,128,296,297,387	Tomato and eggplant QTL for resistance to bacterial wilt (Ralstonia solanacearum)	QRL (quantitative resistance locus)																		29 - 35 Mbp
6	GP35		S. tuberosum	1,6,7,8,31	Potato STS marker	STS (sequence-tagged-site)	CG783250, NCBI											GP35-f	51.001	not annotated	Soltu.DM.06G013750	38748392..38747777	38238420..38237805	no matching position
6*	Solyc06g053210		S. lycopersicum	296	Tomato gene flanking tomato QRL Bwr-6	Gene	SGN													PGSC0003DMG400005466	Soltu.DM.06G014060 & Soltu.DM.06G014070	39284105..39286700	38783410..38786005	33737529..33740404	Solyc06g053210
6	TG118		S. lycopersicum	6,7,8,16,19,126,128,308,414	Tomato STS marker, linked tomato QRL BW-6 and QTL for soluble solids (Brix) and fruit weight, proximal to tomato QTL MF6a for fruit mass and SS6a for soluble solids	STS (sequence-tagged-site)	TG118, SGN	TG118	22	TG118	14,4							TG118	18	not annotated	Soltu.DM.06G014060 & Soltu.DM.06G014180	39495985..39497867	39054891..39055383	33857328..33859170	Solyc06g053320
6	solcap_snp_c2_51489		S. tuberosum	253	Potato SNP marker, differential SNP allele frequency between pairs of potato genotype pools with differential tuber yield	SNP (single nucleotide polymorphism)	Spud DB, http://solcap.msu.edu/potato													PGSC0003DMG400016296	Soltu.DM.06G014500	39908548..39908648	39474796..39474817	34121212..34121312	Solyc06g053530
6	cLEG49O24		S. lycopersicum	408	Tomato EST marker, proximal to tomato QTL for fruit soluble solids (Brix)	EST (expressed sequence tag)	BM409651, NCBI													PGSC0003DMG400016291	Soltu.DM.06G014590	40036411..40035571	39612069..39611229	34240724..34239884	Solyc06g053620
6	At2B05 (AT5G65670)		A. thaliana	52,55	Arabidopsis EST marker (Auxin induced genes 8, 9, 14)	EST (expressed sequence tag)	T42378,U18406, NCBI; AT5G65670, TAIR									At2B5-b	22			PGSC0003DMG400016317, PGSC0003DMG400016280	Soltu.DM.06G034480(a), Soltu.DM.06G014850(b)	58523466..58524086(a), 40430590..40430892(b)	40015890..40014610	34499798..34500528(a), 46901200..46901791(b)	Solyc06g053840(a), Solyc06g084070(b)
6	StI021		S. tuberosum	185	Potato microsatellite marker	SSR (simple sequence repeat)	Ref. 185							StI021	22					PGSC0003DMG400016270	Soltu.DM.06G015000	40632820..40632731	40218130..40220250	34628485..34628464	Solyc06g053960
6	solcap_snp_sl_25660		S. lycopersicum	339	Tomato SNP marker, flanking tomato QRL against Xanthomonas sp.	SNP (single nucleotide polymorphism)	sl_25660, SGN													PGSC0003DMG400016312(a), PGSC0003DMG400016346(b)	not annotated(a,b)	40665921..40665827(a), 40674876..40674963(b)	40252540..40252446(a), 40261560..40261647(b)	34651470..34651570(a), 34649325..34649228(b)	Solyc06g054000(a), Solyc06g053990(b)
6	StI011		S. tuberosum	185.218	Potato microsatellite marker in potato EST	SSR (simple sequence repeat)	BG888359, NCBI					STI0011	23	StI011	7					PGSC0003DMG400016311	Soltu.DM.06G015030	40704594..40705184	40294568..40294961	34664325..34664613	Solyc06g054010
6	GP255		S. tuberosum	7,8,18	Potato STS marker, flanking potato QTL for tuber yield	STS (sequence-tagged-site)	CG783188, NCBI													intergenic	intergenic	40716817..40716551	40307064..40307379	no matching position
6	RsR6-5		S. lycopersicum	40	Tomato CAPS marker diagnostic for bacterial wilt resistance (Bwr-6)	STS (sequence-tagged-site)	Ref. 40															no sequence homology	no sequence homology	34848848..34849051	# Solyc06g054230
6	Solyc06g054230		S. lycopersicum	296	Tomato gene flanking Bwr-6	Gene	SGN													PGSC0003DMG400011817	Soltu.DM.06G015440	41056596..41055430	40573535..40572369	34849053..34847862	# Solyc06g054230
6*	CT285		S. lycopersicum	19,32,262	Tomato EST marker, linked to tomato QRL for early blight (Alternaria solani) and Ol-1	EST (expressed sequence tag)	AA825002, NCBI	CT285	27											PGSC0003DMG400011816	Soltu.DM.06G015480	41090253..41089800	40606992..40606539	34874961..34874506	Solyc06g054260
6	CT83		S. lycopersicum	19,32,310	Tomato EST marker, South border of tomato IL6-1, on IL6-2 and IL6-2-2, flanking tomato QTL for soluble solids (Brix)	EST (expressed sequence tag)	CT83, SGN	CT83	31.8											PGSC0003DMG400030763	Soltu.DM.06G015720	41322469..41322469	40834152..40834152	35057518..35057518	Solyc06g054510
6	TG25		S. lycopersicum	19,32,123,242,269,350,352	Tomato STS marker, South of tomato IL6-1, on IL6-2 and IL6-2-2, , linked to tomato QRL Ol-qtl1 and Ty-1, flanking tomato R gene Ol-5, proximal to tomato QTL for fruit weight (mass), yield and soluble solids (Brix)	STS (sequence-tagged-site)	TG25, SGN	TG25	31.8	TG25	16,0									PGSC0003DMG400030782	Soltu.DM.06G015820	41419988..41420123	40931906..40932041	35121473..35122031	Solyc06g054590
6	solcap_snp_c2_52385		S. tuberosum	374	Potato SNP marker, flanking potato QTL for tuber sugar content (cold induced sweetening)	SNP (single nucleotide polymorphism)	Spud DB, http://solcap.msu.edu/potato													not annotated	Soltu.DM.06G015920	41547521.. 41547421	41061485..41061385	35200590..35200490	Solyc06g054650
6	cLEN10H12		S. lycopersicum	280,408	Tomato EST marker, linked to tomato QRL for early blight (EB6.1) and to QTL for fruit soluble solids (Brix), proximal to tomato QTL tSS6.3 for fruit soluble solids	EST (expressed sequence tag)	AW223205, NCBI													PGSC0003DMG400030771	Soltu.DM.06G016070	41698319..41699217	41213733..41214631	35287566..35288398	Solyc06g059740
6	SSR128		S. lycopersicum	411	Tomato microsatellite marker, flanking tomato gene Cf-6 for resistance to C. fulvum	SSR (simple sequence repeat)	SSR128, SGN													not annotated	Soltu.DM.06G016080	41724373..41724481	41239778..41239886	35315633..35315736	Solyc06g059750
6	SCAF10		S. lycopersicum	267	Tomato SCAR marker, flanking tomato R gene Ol-1	STS (sequence-tagged-site)	Ref. 267													PGSC0003DMG400019783	Soltu.DM.06G016540	42399269..42399649(a), 42427625..42428005(b) et al.	41877080..41877460	35541618..35542001	Solyc06g059930
6*	St_At1g77470		S. tuberosum	212	Potato ortholog to Sl_At1g77470 (ATPase, AAA+ type)	COS (conserved orthologous sequence)	At1g77470, TAIR													not annotated	Soltu.DM.06G017060	43308412..43316108	42866811..42877111	35788927..35793889	Solyc06g060150
6	CP18		S. tuberosum	1,6,7,8,13,14,19,52,99,126,127,223	Potato EST marker (Photosystem II, 22 kD protein precursor), linked to tomato QRL BW-6 and potato QRL for late blight	EST (expressed sequence tag)	AJ487328, NCBI	CP18	35							CP18	28	CP18	26	# PGSC0003DMG400017556	# Soltu.DM.06G017440	43683410..43683676	43260200..43261970	36000850..36001980	# Solyc06g060340
6	St_At1g44575		S. tuberosum	212	Potato ortholog to Sl_At1g44575 (Photosystem II, Chlorophyll a/b binding protein)	COS (conserved orthologous sequence)	At1g44575, TAIR													# PGSC0003DMG400017556	# Soltu.DM.06G017440	43683820..43685021	43260637..43261838	36002433..36002654	# Solyc06g060340
6	Solyc06g060560		S. lycopersicum	337	Tomato candidate gene (Pentatricopeptide repeat-containing protein) for tomato QTL for fruit weight (tFW6.3), associated with tomato fruit weight	Gene	Solyc06g060560, SGN													PGSC0003DMG400017582	Soltu.DM.06G017680	43923657..43922249	43504188..43502780	36239626..36238480	Solyc06g060560
6	J350		S. lycopersicum	420	Tomato marker flanking tomato resistance locus RXopJ4	STS (sequence-tagged-site)	Ref. 420													PGSC0003DMG400013815	Soltu.DM.06G017770	44033930..44034223	43657938..43658231	36318162..36318440	Solyc06g060620
6	SLM6-17 (TM43)		S. lycopersicum	296	Tomato microsatellite marker, linked to tomato QRL Bwr-6	SSR (simple sequence repeat)	Ref. 296, SGN													intergenic	intergenic	44035704..44035682	43659712..43659690	36319734..36319906	intergenic
6	P1349		S. lycopersicum	350	Tomato CAPS marker, flanking tomato R genes Ol-1 and Ol-5	STS (sequence-tagged-site)	Ref. 350													PGSC0003DMG400011881	Soltu.DM.06G017980	44291007..44286715	43901720..43902186	36422208..36416874	Solyc06g060730
6		RXopJ4	S. pennellii	420	Tomato gene for resistance to Xanthomonas perforans	R gene																		36,3 - 36,6 Mbp
6		EBR6.1 (EB6.1)	S. habrochaites (L. hirsutum), S. pimpinellifolium	262,280	Tomato QTL for resistance to early blight (Alternaria solani)	QRL (quantitative resistance locus)																		26 - 38 Mbp
6		Ol-1, Ol-3, Ol-5	S. neorickii (S. parviflorum)	10,13,20,32,267,350	Tomato gene for resistance to Oidium lycopersici (powdery mildew).	R gene																		35,1 - 37 Mbp
6		Ol-qtl1	S. neorickii (S. parviflorum)	269,270,352	Tomato QTL for resistance to Oidium lycopersici (powdery mildew)	QRL (quantitative resistance locus)																		33 - 37 Mbp
6		pLBR6.2	S. tuberosum	29,50,223	Potato QTL for resistance to late blight	QRL (quantitative resistance locus)																42 - 47 Mbp	42 - 47Mbp
6	J352		S. lycopersicum	420	Tomato marker flanking tomato resistance locus RXopJ4	STS (sequence-tagged-site)	Ref. 420													PGSC0003DMG400024157	Soltu.DM.06G018130	44495226..44495612	44074744..44075130	36520700..36521091	Solyc06g060830
6	H9A11		S. lycopersicum	267,350	Tomato CAPS marker, flanking tomato R gene Ol-1	STS (sequence-tagged-site)	Ref. 350													PGSC0003DMG400026580	Soltu.DM.06G018290	44669872..44669847	44285490..44285465	36624201..36623792	Solyc06g060980
6	TG177		S. lycopersicum	19,32	Tomato STS marker, South border of tomato IL6-2-2, on IL6-2	STS (sequence-tagged-site)	TG177, SGN	TG177	37.9											PGSC0003DMG401002094	Soltu.DM.06G018490	45046677..45046365	44663577..44663265	36799162..36798925	Solyc06g061120
6	GP96		S. tuberosum	1,6,7,8	Potato STS marker	STS (sequence-tagged-site)	CG783266, CG783267, NCBI											GP96-a	29	PGSC0003DMG402002094	Soltu.DM.06G018500	45054423..45053569	44671330..44666400	36806474..36805609	Solyc06g061130
6*	CT184		S. lycopersicum	19,125,270	Tomato EST marker, flanking tomato QRL BW-6B and Ol-qtl1	EST (expressed sequence tag)	CT184, SGN	CT184A	37.9											not annotated	Soltu.DM.06G018540	45075650..45075650	44692740..44689570	36823492..36823492	Solyc06g061150
6	P10g7		S. tuberosum	52,55	Potato EST marker (Syntaxin related)	EST (expressed sequence tag)	AJ487388, NCBI									P10g7-b	37.001			PGSC0003DMG401016772	Soltu.DM.06G018800	45471594..45466614	45136480..45131500	36990174..36985333	Solyc06g062360
6*	StI016		S. tuberosum	185.218	Potato microsatellite marker	SSR (simple sequence repeat)	Ref. 185					STI0016	29	StI016	17					# PGSC0003DMG400016769	# Soltu.DM.06G018840	45486629..45483846	45149200..45151990	39309778..39312766	# Solyc06g066370
6	WRKY2		S. tuberosum	29,385	Potato homolog of tobacco defense gene NtWRKY1/2/3/4, expression in potato up regulated upon infection with P. infestans, functional candidate gene for QRL, linked with potato late blight QRL	Gene	AB020590, NCBI													# PGSC0003DMG400016769	# Soltu.DM.06G018840	45486629..45483846	45151963..45149253	39309778..39312766	# Solyc06g066370
6	TG472		S. lycopersicum	19	Tomato STS marker	STS (sequence-tagged-site)	TG472, SGN	TG472	37.9											not annotated	Soltu.DM.06G018890	45590461..45589778	45262429..45261746	39230474..39231138	Solyc06g066310
6	S1a8		S. tuberosum	52	Potato EST marker (Nuclear RNA helicase)	EST (expressed sequence tag)	AJ489103, NCBI									S1a8-a	37.002			PGSC0003DMG400020476	Soltu.DM.06G019290	45955988..45948788	45663500..45671000	39049604..39056970	Solyc06g066060
6	6_45694949		S. tuberosum	50	Potato SNP marker, associated with potato resistance to late blight	SNP (single nucleotide polymorphism)	Ref. 50													intergenic	intergenic	45980112..45980151	45694949	no sequence homology
6		tBWR6.2 (BW-6B)	S. lycopersicum	10,99,125,126,127,128	Tomato QTL for resistance to bacterial wilt (Ralstonia solanacearum)	QRL (quantitative resistance locus)																		37 - 40 Mbp
6		CSR6.1	S. tuberosum	356	Potato QTL for resistance to common scab (Streptomyces scabies)	QRL (quantitative resistance locus)																~ 45 - 47 Mbp	~ 45 - 47 Mbp
6	solcap_snp_c1_8133		S. tuberosum	356	Potato SNP marker, associated with potato QTL for resistance to common scab (Streptomyces scabies)	SNP (single nucleotide polymorphism)	Spud DB, http://solcap.msu.edu/potato													not annotated	Soltu.DM.06G019680	46301289..46301189	46026594..46026494	38778287..38778385	Solyc06g065700
6	STG0005		S. tuberosum	218	Potato microsatellite marker from potato EST	SSR (simple sequence repeat)	BG599731, NCBI					STG0005a	38							PGSC0003DMG400026130	Soltu.DM.06G019830	46526788..46528882	46255386..46257328	38618975..38616904	Solyc06g065590
6	CT108		S. lycopersicum	19,149	Tomato EST marker, linked to tomato QRL for late blight lb6a	EST (expressed sequence tag)	AA824810, NCBI	CT108	37.9											PGSC0003DMG400026129	Soltu.DM.06G019840	46531669..46534677	46258400..46267800	38614207..38611732	Solyc06g065580
6		tSS6.4 (SS6a)	S. lycopersicum, S. cheesmanii	414	Tomato QTL for soluble solids (Brix)	QTL (quantitative trait locus)																		34 - 39 Mbp
6		tFW6.3 (fw6.2, MF6a)	S. lycopersicum, S. pennellii, S. pimpinellifolium, S. cheesmanii	242,337,409,414	Tomato QTL for fruit weight (mass) and size	QTL (quantitative trait locus)																		35 - 40 Mbp
6		tFY6.1 (ydt6.1)	S. lycopersicum, S. habrochaites (L. hirsutum), S. pennellii	242,312	Tomato QTL for fruit total yield	QTL (quantitative trait locus)																		37 - 41 Mbp
6		tM6.1 (mat6.1)	S. lycopersicum, S. parviflorum	314	Tomato QTL for maturity	QTL (quantitative trait locus																		38 - 42 Mbp
6	TG54		S. lycopersicum	19,123,218,242,308,414	Tomato STS marker, on tomato IL6-2, linked to tomato QRL Ty-1 and QTL for fruit weight, distal to tomato QTL MF6a for fruit weight and SS6a for soluble solids	STS (sequence-tagged-site)	TG54, SGN	TG54	37.9			TG54	21							PGSC0003DMG400026120	Soltu.DM.06G019980	46653133..46653637	46384200..46378400	38513655.. 38513164	Solyc06g065480
6	CT76		S. lycopersicum	19	Tomato EST marker	EST (expressed sequence tag)	CT76, SGN	CT76	37.9											PGSC0003DMG400026118	Soltu.DM.06G020000	46672534..46672433	46403779..46403678	38494420..38494507	not annotated
6*	TG240		S. lycopersicum	19,99,127,128,314	Tomato STS marker, linked to tomato QRL BW-6B, flanking tomato QTL for maturity	STS (sequence-tagged-site)	TG240, SGN	TG240	37.9	TG240	19,6									PGSC0003DMG400026078	Soltu.DM.06G020080	46745431..46743655	46474265..46474769	38448362..38450141	Solyc06g065390
6	GP262		S. tuberosum	7,8	Potato STS marker, expressed gene, unknown function	STS (sequence-tagged-site)	CG783196, NCBI											GP262	34	PGSC0003DMG400026072	Soltu.DM.06G020210	46875093..46876123	46612200..46616200	38347310..38346300	Solyc06g065270
6	INV-na-6/1		S. tuberosum	235	Neutral/alkaline invertase (EC3.2.1.26), sugar metabolism, functional candidate gene for potato tuber reducing sugar content QTL	Gene	Spud DB, SGN													PGSC0003DMG400026107	Soltu.DM.06G020260	46926872..46927558	46660300..46665800	38301102..38300427	Solyc06g065210
6	St3.3.1		S. tuberosum	9,13,52	Resistance gene like	RGL sequence (resistance-gene-like)	U60079, NCBI									St3.3.1-a	40.003			not annotated(a), PGSC0003DMG400031318(b)	Soltu.DM.06G020320(a), Soltu.DM.06G020350(b), Soltu.DM.06G020420(c)	46975383..46974934(a), 47027981..47027532(b), 47136922..47136473(c) et al.	46720971..46720522(a), 46919518..46919069(b) et al.	no sequence homology
6	solcap_snp_c2_46172		S. tuberosum	294	Potato SNP marker, associated with potato QTL for plant maturity		Spud DB, http://solcap.msu.edu/potato													PGSC0003DMG401031322	Soltu.DM.06G020530	47266275..47266175	47053472..47053493	38181423..38181523	Solyc06g065020
6	TG352		S. lycopersicum	19,32,242,321,352	Tomato STS marker, on tomato IL6-1, North border of IL6-2 and IL6-2-2, linked to tomato QTL for fruit soluble solids (Brix), linked to tomato QTL Ol-qtl1	STS (sequence-tagged-site)	TG352, SGN	TG352	25											# PGSC0003DMG400005187	# Soltu.DM.06G020710	47462565..47463210	47251164..47251809	38091386..38090779	# Solyc06g064890
6	TG356		S. lycopersicum	280,312,409	Tomato STS marker, linked to tomato QTL for fruit total yield and size, flanking tomato QRL for early blight (EB6.1)	STS (sequence-tagged-site)	TG356, SGN													# PGSC0003DMG400005187	# Soltu.DM.06G020710	47462565..47463179	47251164..47251778	38091386..38090810	# Solyc06g064890
6	INV-6/2		S. tuberosum	235	Invertase (EC3.2.1.26), sugar metabolism, functional candidate gene for potato tuber reducing sugar content QTL	Gene	Spud DB, SGN													PGSC0003DMG400033142	Soltu.DM.06G021110	47836802..47838245	47626000..47633600	37912280..37910263	Solyc06g064620
6	S2a4		S. tuberosum	52.55	Potato EST marker (Ribosomal protein L7a)	EST (expressed sequence tag)	AJ489132, NCBI									S2a4-b	40.001			PGSC0003DMG400033137	Soltu.DM.06G021330(a), Soltu.DM.06G011130(b)	47974429..47974679(a), 33337564..33337355(b)	47767400..47761400	37789249..37788999(a), 30206946..30207194(b)	Solyc06g064460(a), Solyc06g050120(a)
6	solcap_snp_c2_16777		S. tuberosum	346	Potato SNP marker linked with potato QTL for resistance to Tecia solanivora	SNP (single nucleotide polymorphism)	Spud DB, http://solcap.msu.edu/potato													not annotated	Soltu.DM.06G021400	48044270..48044170	47838429..47838450	37730228..37730328	Solyc06g063410
6	P8g9		S. tuberosum	52,55	Potato EST marker (Chlorphyll a/b binding CP26, LHCb5)	EST (expressed sequence tag)	AJ487453, NCBI									P8g9-b	40.002			PGSC0003DMG400026500	Soltu.DM.06G021700	48296607..48297216	48022190..48020280	37697777..37697315	Solyc06g063370
6	TG73		S. lycopersicum	19,99,126,128	Tomato STS marker, linked to tomato QRL BW-6B	STS (sequence-tagged-site)	TG73, SGN	TG73	37.9											not annotated	Soltu.DM.06G021910	48433495..48432955	48159269..48158729	37576028..37574772	Solyc06g063200
6*	TG164		S. lycopersicum	19,267,312,352	Tomato STS marker, flanking tomato R gene Ol-1, linked to tomato QRL Ol-qtl1, flanking tomato QTL for fruit total yield	STS (sequence-tagged-site)	TG164, SGN	TG164	37.9											# PGSC0003DMG400004869	# Soltu.DM.06G022140	48583205..48585295	48302711..48303153	37532187..37530061	# Solyc06g063130
6	TG593		S. lycopersicum	19	Tomato STS marker	STS (sequence-tagged-site)	TG593, SGN	TG593	40											# PGSC0003DMG400004869	# Soltu.DM.06G022140	48586245..48587429	48305751..48306935	37529113..37527903	# Solyc06g063130
6	CT58		S. lycopersicum	19	Tomato EST marker	EST (expressed sequence tag)	CT58, SGN	CT58	37.9											# PGSC0003DMG400004898	# Soltu.DM.06G022200	48660962..48661399	48382496..48382929	37469651..37469195	# Solyc06g063070
6	GP215		S. tuberosum	6,7,8	Potato STS marker (AP2 domain containing protein)	STS (sequence-tagged-site)	CG783157, NCBI											GP215-b	35	# PGSC0003DMG400004898	# Soltu.DM.06G022200	48660514..48660393	48383010..48380500	37470104..37470338	# Solyc06g063070
6	solcap_snp_c2_31144		S. tuberosum	346	Potato SNP marker, linked with potato QTL for resistance to Tecia solanivora	SNP (single nucleotide polymorphism)	Spud DB, http://solcap.msu.edu/potato													not annotated	Soltu.DM.06G022760	49152108..49152008	48879127..48879148	37098888..37098979	Solyc06g062530
6*	StGP28		S. phureja	294,341,385	Stem 28 kDa glycoprotein, in potato differential expression between quantitative late blight resistant and susceptible genotype pools, expression down regulated upon infection with P. infestans, functional candidate gene for late blight QRL, associated with potato QRL for late blight (MCR).	Gene	Spud DB, SGN													PGSC0003DMG402016495	Soltu.DM.06G022960	49317033..49318524	49100840..49102340	36994753..37001152	Solyc06g062375
6		pLBR6.3	S. phureja	294,341	Potato QTL for maturity corrected resistance to late blight (MCR)	QRL (quantitative resistance locus)																~ 48 - 51 Mbp	~ 48 - 51 Mbp
6		Ts6.1 (qIPC6, qOPA6)	S. tuberosum	346	Potato QTL for resistance to Tecia solanivora	QRL (quantitative resistance locus)																48 - 52 Mbp	48 - 52 Mbp
6	At1G12 (AT4G11150)		A. thaliana	52	Arabidopsis EST marker (Vacuolar proton ATPase, subunit E)	EST (expressed sequence tag)	Z25801, NCBI; AT4G11150, TAIR									At1G12	44					no matching position	no matching position	no matching position
6	HXK-6		S. tuberosum	197,235	Hexokinase (EC2.7.1.1), glycolysis, functional candidate gene for tomato fruit and potato tuber quality QTL	Gene	NM_001287912, NCBI													PGSC0003DMG400016521	Soltu.DM.06G023000	49346323..49341846	49126980..49131660	39349031..39344873	Solyc06g066440
6	TG406		S. lycopersicum	19.308	Tomato STS marker,	STS (sequence-tagged-site)	TG406, SGN	TG406A	37.9											PGSC0003DMG400016504	Soltu.DM.06G023190	49518019..49519407	49305978..49307366	39516192..39517304	Solyc06g066640
6	Solyc06g066820		S. lycopersicum	337	Tomato candidate gene (Gibberellin 3-beta-dioxygenase 1 , oxidoreductase, converts the inactive gibbberellin precursors GA9 and GA20 in the bioactives gibberellins GA4 and GA1) for tomato QTL for fruit weight (tFW6.3), associated with tomato fruit weight	Gene	Solyc06g066820, SGN													PGSC0003DMG400016516	Soltu.DM.06G023440	49725847..49728410	49523172..49525735	39655464..39658075	Solyc06g066820
6	Vatp		S. lycopersicum	197	Vacuolar membrane ATPase subunit c'', proton transport, functional candidate gene for tomato fruit quality QTL	Gene	AI488532 , NCBI													PGSC0003DMG400028549	Soltu.DM.06G023580	49913492..49913778	49633347..49633633	39705986..39706272	Solyc06g067880
6*	solcap_snp_c2_33892		S. tuberosum	346	Potato SNP marker, linked with potato QTL for resistance to Tecia solanivora	SNP (single nucleotide polymorphism)	Spud DB, http://solcap.msu.edu/potato													# PGSC0003DMG400028516	# Soltu.DM.06G023620	49952589..49952489	49672061..49672082	39736811..39736711	# Solyc06g067920
6	At2F09 (AT5G40810)		A. thaliana	52,55	Arabidopsis EST marker (Cytochrome c1, heme protein precursor)	EST (expressed sequence tag)	Z25972, NCBI; AT5G40810, TAIR									At2F9-c	47			# PGSC0003DMG400028516	# Soltu.DM.06G023620	49953219..49951300	49672669..49671255	39737225..39735812	# Solyc06g067920
6	Cyt-c red 33kD		S. tuberosum	8	Cytochrom c reductase, 33 kD subunit, c1.1	Gene	X62124, NCBI											Cyt-c red 33kD-a	45	# PGSC0003DMG400028516	# Soltu.DM.06G023620	49956537..49951108	49676100..49670600	39741329..39735072	# Solyc06g067920
6	solcap_snp_c2_5758		S. tuberosum	253	Potato SNP marker, differential SNP allele frequency between pairs of potato genotype pools with differential tuber yield	SNP (single nucleotide polymorphism)	Spud DB, http://solcap.msu.edu/potato													PGSC0003DMG400028926	Soltu.DM.06G024450	50524726..50524826	50296993..50297014	40172641..40172741	Solyc06g068620
6	St4cl		S. tuberosum	1,6,7,8,94	4-coumarate: CoA ligase, patogenesis related, functional candidate gene for quantitative resistance to pathogens	Gene	M62755, NCBI											St4cl-b	46.002	PGSC0003DMG400028929	Soltu.DM.06G024540	50571932..50571509	50341580..50345660	40195213..40194742	Solyc06g068650
6	TG365		S. lycopersicum	19,32,125,309,321	Tomato STS marker, on tomato IL6-2, South of IL6-2-2, flanking tomato QRL BW-6 , linked to tomato QTL for soluble solids (Brix)	STS (sequence-tagged-site)	TG365, SGN	TG365	42											not annotated	# Soltu.DM.06G024560(a), Soltu.DM.06G024580(b)	50598381..50599206(a), 50620496..50621006(b)	50372334..50371860	40212832..40213688	# Solyc06g068680
6	GP89		S. tuberosum	1,6,7,8,19	Potato STS marker (Respiratory burst oxidase protein)	STS (sequence-tagged-site)	CG783263, NCBI	GP89	42									GP89	46.001	not annotated	# Soltu.DM.06G024580(a), Soltu.DM.06G024560(b),	50621486..50622748(a), 50599681..50600941(b)	50394411..50395673	40214165..40215228	# Solyc06g068680
6	RPS27		S. tuberosum	294,341,385	Ribosomal protein S27, in potato differential expression between quantitative late blight resistant and susceptible genotype pools, functional candidate gene for potato late blight QRL	Gene	Spud DB, SGN													PGSC0003DMG401028933	Soltu.DM.06G024600	50639085..50636686	50409850..50412260	40229458..40228207	Solyc06g068710
6	ICE2		S. tuberosum	294,341	Inducer of CBF expression (ICE), transcription factor, in potato differential expression between quantitative late blight resistant and susceptible genotype pools, functional candidate gene for potato late blight QRL	Gene	Spud DB, SGN													PGSC0003DMG401028788	Soltu.DM.06G024810	50787809..50784895	50573710..50578580	40332063..40329263	Solyc06g068870
6*	CT136		S. lycopersicum	19,314,352	Tomato EST marker, linked to tomato QTL for maturity, flanking tomato QRL Ol-qtl1	EST (expressed sequence tag)	AA824846, NCBI	CT136	46											PGSC0003DMG400028797	Soltu.DM.06G024890	50868657..50868438	50663390..50663171	40416871..40416646	Solyc06g068960
6	P1g11		S. tuberosum	52	Potato EST marker (G protein, beta subunit)	EST (expressed sequence tag)	AJ487405, NCBI									P1g11-a	54.001			PGSC0003DMG400028795	Soltu.DM.06G024950	50920247..50920846	50718430..50715730	40453236..40453833	Solyc06g069010
6	P8a9		S. tuberosum	52.55	Potato EST marker (Ribosomal protein S7, RPS7)	EST (expressed sequence tag)	AJ487445, NCBI									P8a9-a	10.01			PGSC0003DMG400028781	Soltu.DM.06G025020	50985104..50983135	50784000..50786540	40516386..40514491	Solyc06g069090
6	GP30		S. tuberosum	1,6,7,8	Potato STS marker	STS (sequence-tagged-site)	CG783230, NCBI											GP30	49.002			no matching position (chr07)	no matching position (chr07)	no matching position (chr07)
6	STM5126		S. tuberosum	218	Potato microsatellite marker	SSR (simple sequence repeat)	Ref. 218					STM5126	47							PGSC0003DMG400004051	Soltu.DM.06G025150	51088339..51088639	50922602..50922923	40578559..40578538	Solyc06g069170
6	StI059		S. tuberosum	185	Potato microsatellite marker	SSR (simple sequence repeat)	Ref. 185							StI059	33					PGSC0003DMG400004054	Soltu.DM.06G025210	51156934..51157053	50995910..50994180	40639132..40640717	Solyc06g069240
6	T0570		S. lycopersicum	265	Tomato STS marker, flanking tomato QTL for late blight resistance tLBR6.2	STS (sequence-tagged-site)	T0570, SGN													PGSC0003DMG402004079 & PGSC0003DMG401004079	Soltu.DM.06G025380	51323915..51322721	51175139..51173945	40787654..40787388	Solyc06g069390
6	STM1100		S. tuberosum	3,16,218	Potato microsatellite marker, linked to potato QTL for late blight resistance , plant maturity and vigour	SSR (simple sequence repeat)	U23757, NCBI					STM1100	47							# PGSC0003DMG400004081	# Soltu.DM.06G025430	51346879..51339662	51191100..51198200	40813900.. 40805954	# Solyc06g069430
6	StI015		S. tuberosum	185,217,218,247	Potato microsatellite marker, linked to potato QTL for resistance to S. endobioticum (RSe-VIa)	SSR (simple sequence repeat)	Ref. 185					StI0015	42	StI015	32					# PGSC0003DMG400004081	# Soltu.DM.06G025430	51339683..51339886	51191100..51198200	40806207..40806188	# Solyc06g069430
6	GP24		S. tuberosum	1,6,7,8	Potato STS marker	STS (sequence-tagged-site)	CG783176, NCBI											GP24	52	not annotated	Soltu.DM.06G025690	51646765..51647705	51476115..51476774	40983051..40983954	Solyc06g069610
6	TG444		S. lycopersicum	19,321	Tomato STS marker, flanking tomato QTL for fruit soluble solids (Brix)	STS (sequence-tagged-site)	TG444, SGN	TG444	50.5											PGSC0003DMG400033051 & PGSC0003DMG400033052	Soltu.DM.06G025710	51651977..51653939	51481336..51483298	40988233..40990131	Solyc06g069630
6	CT204		S. lycopersicum	19	Tomato EST marker	EST (expressed sequence tag)	CT204, SGN	CT204	50.5											PGSC0003DMG400033046	Soltu.DM.06G025850	51758916..51758449	51599551..51599084	41075077..41074610	Solyc06g069760
6	St_At5g62530		S. tuberosum	212	Potato ortholog to Sl_At5g62530 (mitochondrial Delta-pyrroline-5- carboxylate dehydrogenase)	COS (conserved orthologous sequence)	At5g62530, TAIR									St_At5g62530	54.003			PGSC0003DMG400033072	Soltu.DM.06G026110	51996810..51999444	51836000..51843600	41280101..41284316	Solyc06g071000
6		pTSC6.2 (CIS_E_06-3, REC_E_06-2)	S. tuberosum, S. berthaultii	355	Potato QTL for tuber sugar content (cold-induced sweetening)	QTL (quantitative trait locus)																~ 52 - 56 Mbp	~ 52 - 56 Mbp
6		tSS6.3 (brx6.1, ssc6.1, ssc6.2, ssc6a, sugs6.1, SS6b)	S. lycopersicum, S. pimpinellifolium, S. pennellii, S. peruvianum, S. cheesmanii	242,245,309,313,321,337,408,414	Tomato QTL for fruit soluble solids (Brix) and total sugar content	QTL (quantitative trait locus)																		40 - 46 Mbp
6	cLEC75A1		S. lycopersicum	408	Tomato EST marker, flanking tomato QTL for fruit soluble solids (Brix)	EST (expressed sequence tag)	BI423058, NCBI													PGSC0003DMG400033035	Soltu.DM.06G026180	52060586..52059213	51908006..51906633	41320061..41318708	Solyc06g071050
6	Solyc06g071060		S. lycopersicum	337	Tomato candidate gene (Short-chain dehydrogenase/reductase family protein ) for tomato QTL for soluble solids content (Brix) (tSS6.3), associated with fruit soluble solids content (Brix)	Gene	Solyc06g071060, SGN													PGSC0003DMG400033100	Soltu.DM.06G026190	52066260..52067048	51913680..51914468	41324689..41325477	Solyc06g071060
6	TG253		S. lycopersicum	19,149,123,242,308,414	Tomato STS marker, on tomato IL6-2, linked to tomato R gene Ty-1 and to tomato QRL for late blight, linked to tomato QTL for soluble solids (Brix) and fruit weight	STS (sequence-tagged-site)	TG253, SGN	TG253	52.8											PGSC0003DMG400033099	Soltu.DM.06G026200	52072085..52071732	51919505..51919152	41328350..41327321	Solyc06g071070
6	Pha1		S. tuberosum	2,7,8,13,52	Proton ATPase 1 (EC 3.6.1.34), membrane transport, functional candidate gene for tuber quality QTL	Gene	X76536, NCBI									Pha1-b	49			PGSC0003DMG400033034	Soltu.DM.06G026220	52085211..52077575	51925000..51932900	41341252..41334332	Solyc06g071100
6*	CT174		S. lycopersicum	19,312	Tomato EST marker, flanking tomato QTL for fruit total yield	EST (expressed sequence tag)	CT174, SGN	CT174	52.8											PGSC0003DMG400033031	Soltu.DM.06G026280	52155641..52158763	52004428..52007550	41409654..41412738	Solyc06g071160
6	StI045		S. tuberosum	185	Potato microsatellite marker	SSR (simple sequence repeat)	Ref. 185							StI045	38					PGSC0003DMG400033060	Soltu.DM.06G026340	52216570..52216550	52065670..52069680	41470744..41474812	Solyc06g071210
6	StEDS1		S. tuberosum	165.345	Potato homolog of the Arabidopsis EDS1 gene functional in pathogen defense, functional candidate gene for late blight QRL	Gene	AY679160, NCBI									StEDS1	50			PGSC0003DMG400033029	Soltu.DM.06G026420(a), Soltu.DM.06G026400(b)	52279168..52276568(a), 52274483..52271886(b)	52121200..52129300	41520497..41517832	Solyc06g071280
6	TG364		S. lycopersicum	19,185,218	Tomato STS marker,	STS (sequence-tagged-site)	TG364, SGN	TG364A	56	TG364	33,9	TG364	50	TG364	39					PGSC0003DMG400033028	Soltu.DM.06G026410	52282784..52283303	52132895..52133414	41523967..41524490	Solyc06g071290
6	GP299		S. tuberosum	7,8	Potato STS marker (Similar to LIM domain protein, transcription factor)	STS (sequence-tagged-site)	CG783229, NCBI											GP299-a	57.001	PGSC0003DMG400033056	Soltu.DM.06G026440	52301985..52302686	52152954..52153426	41548371..41549058	Solyc06g071310
6	SLM6-59		S. lycopersicum	295	Tomato microsatellite marker, linked with tomato QRL qTy6.1	SSR (simple sequence repeat)	Ref. 295													PGSC0003DMG400027095	Soltu.DM.06G026530	52356707..52356688	52259795..52259776	41594451..41594605	Solyc06g071400
6		qTy6.1	S. chilense	295	Tomato QTL for resistance to Tomato Yellow Leaf Curl Virus (TYLCV)	QRL (quantitative resistance locus)																		40 - 45,3 Mbp
6	solcap_snp_c2_8791		S. tuberosum	346	Potato SNP marker, linked with potato QTL for resistance to Tecia solanivora	SNP (single nucleotide polymorphism)	Spud DB, http://solcap.msu.edu/potato													PGSC0003DMG400026997	Soltu.DM.06G026540	52361074..52361174	52264202..52264223	41598846..41598932	Solyc06g071410
6	StI041		S. tuberosum	185	Potato microsatellite marker	SSR (simple sequence repeat)	Ref. 185							StI041	54					# PGSC0003DMG400027093	Soltu.DM.06G026560	52372678..52372788	52284200..52275700	41610525..41610549	# Solyc06g071430
6	SLM6-55		S. lycopersicum	295	Tomato microsatellite marker, linked to tomato QRL qTy6.1	SSR (simple sequence repeat)	Ref. 295													# PGSC0003DMG400027093	not annotated	52380738..52380756	52283826..52283844	41618719..41618902	# Solyc06g071430
6	GP211		S. tuberosum	6,7,8	Potato STS marker	STS (sequence-tagged-site)	CG783154, NCBI											GP211	55	# PGSC0003DMG400027090	# Soltu.DM.06G026600	52401976..52401105	52301900..52309300	41637623..41636736	# Solyc06g071470
6	GP233		S. tuberosum	6,7,8	Potato STS marker	STS (sequence-tagged-site)	CG783172, NCBI											GP233	56	# PGSC0003DMG400027090	# Soltu.DM.06G026600	52401976..52401105	52301900..52309400	41637617..41636736	# Solyc06g071470
6	T1556		S. lycopersicum	265	Tomato STS marker, linked to tomato late blight QRL from S. pennellii	STS (sequence-tagged-site)	T1556, SGN													# PGSC0003DMG400027090	# Soltu.DM.06G026600	52398770..52400754	52302141..52302830	41635377..41636393	# Solyc06g071470
6	S1b2		S. tuberosum	52.55	Potato EST marker (Ribosomal protein L41, RL41)	EST (expressed sequence tag)	AJ489104, NCBI									S1b2-c	57.002			PGSC0003DMG400027086	Soltu.DM.06G026670	52481432..52483402	52384560..52387120	41706010..41707790	Solyc06g071530
6	St_At4g24690		S. tuberosum	212	Potato ortholog to Sl_At4g24690 (ubiquitin-associated (UBA)/TS-N domain-containing protein)	COS (conserved orthologous sequence)	At4g24690, TAIR									St_At4g24690	54.002			PGSC0003DMG400027073	Soltu.DM.06G026900	52675425..52678081	52585730..52590130	41869018..41870509	Solyc06g071770
6		RSe-VIa	S. tuberosum	217.247	Potato QTL for resistance to Synchitrium endobioticum (potato wart)	QRL (quantitative resistance locus)																51 - 56 Mbp	51 - 56 Mbp
6	Solyc06g071810		S. lycopersicum	261.285	Tomato receptor-like kinase, candidate gene for tomato QTL for resistence to late blight	Gene	SGN													PGSC0003DMG400027071	Soltu.DM.06G026940	52707711..52709584	52619948..52621821	41899650..41901527	Solyc06g071810
6	S1a4		S. tuberosum	52.55	Potato EST marker (Ribosomal protein L17)	EST (expressed sequence tag)	AJ489101, NCBI									S1a4-b	57.001			PGSC0003DMG400026983	Soltu.DM.06G027020(a), Soltu.DM.06G027030(b)	52760731..52760326(a), 52767710..52767312(b)	52673000..52682300	41949899..41949470(a), 41945313..41944885(b)	Solyc06g071880(a), Solyc06g071870(a)
6*	TG292		S. lycopersicum	19,32,242,314	Tomato STS marker, on tomato IL6-2, North of IL6-3, flanking tomato QTL for maturity, distal to tomato QTL for fruit weight (mass)	STS (sequence-tagged-site)	TG292, SGN	TG292	60.1											PGSC0003DMG402026960	Soltu.DM.06G027590	53172849..53171903	53093589..53092643	42281098..42280168	Solyc06g072340
6	TG552		S. lycopersicum	19,308	Tomato STS marker, linked to tomato QTL for soluble solids (Brix) and fruit weight	STS (sequence-tagged-site)	TG552, SGN	TG552	56.8											intergenic	intergenic(a,b)	53322573..53322302(a), 53052704..53052974(b) et al.	52965243..52965515; 53242610..53242339	42353434..42354196	intergenic
6	CT90		S. lycopersicum	19	Tomato EST marker	EST (expressed sequence tag)	CT90, SGN	CT90B	60.1											PGSC0003DMG400027045	Soltu.DM.06G027840	53345944..53345472	53266362..53265695	42377778..42377120	Solyc06g072490
6	T1169		S. lycopersicum	265	Tomato STS marker, flanking tomato QTL for late blight resistance tLBR6.2	STS (sequence-tagged-site)	T1169, SGN													PGSC0003DMG400027041	Soltu.DM.06G027900	53395524..53399162	53317157..53320794	42420696..42424114	Solyc06g072570
6	Solyc06g072670		S. lycopersicum	337	Tomato candidate gene (Short-chain dehydrogenase/reductase SDR, oxidation/reduction) for tomato QTL for fruit weight (tFW6.3 or tFW6.4), associated with tomato fruit weight	Gene	Solyc06g072670, SGN													PGSC0003DMG402026939	Soltu.DM.06G028000	53471007..53468503	53398269..53395765	42483142..42480809	Solyc06g072670
6	solcap_snp_sl_24445		S. lycopersicum	339	Tomato SNP marker, flanking tomato QRL against Xanthomonas perforans	SNP (single nucleotide polymorphism)	sl_24445, SGN													PGSC0003DMG401026939	Soltu.DM.06G028020	53475771..53475671	53403432..53403332	42487067..42486967	Solyc06g072690
6	DMG402027033		S. tuberosum	253	Zinc finger family protein, gene with differential SNP allele frequency between pairs of potato genotype pools with differential tuber yield, SNP causing amino acid change, candidate gene for potato tuber yield QTL	Gene	Spud DB, SGN													PGSC0003DMG402027033	Soltu.DM.06G028140	53554552..53562472	53482800..53492000	42552478..42559799	Solyc06g072790
6	solcap_snp_c2_22302		S. tuberosum	247	Potato SNP marker, linked to potato QTL for resistance to S. endobioticum (RSe-VIa)	SNP (single nucleotide polymorphism)	Spud DB, http://solcap.msu.edu/potato													PGSC0003DMG400026930	Soltu.DM.06G028240	53615071..53614971	53545529..53545550	42606045..42605947	Solyc06g072880
6		rx6.2	S. lycopersicum	339	Tomato QTL for resistance to Xanthomonas sp. (bacterial spot)	QRL (quantitative resistance locus)																		42 - 43 Mbp
6	solcap_snp_sl_24437		S. lycopersicum	339	Tomato SNP marker, flanking tomato QRL for Xanthomonas perforans	SNP (single nucleotide polymorphism)	sl_24437, SGN													PGSC0003DMG400027024	Soltu.DM.06G028360	53682940..53682840	53614270..53614170	42661872..42661772	Solyc06g073020
6	FRK-6/1 (CP50)		S. tuberosum	1,6,7,8,235,355	Fructokinase (EC2.7.1.4)(potato EST marker CP50), glycolysis, oxidative pentose phosphate pathway, functional candidate gene for potato tuber quality QTL, linked to potato QTL for tuber sugar content	Gene	CF802493, NCBI													# PGSC0003DMG400027017	# Soltu.DM.06G028530	53816577..53817436	53746100..53749420	42757139..42758063	# Solyc06g073180
6	CT146		S. lycopersicum	19,32	Tomato EST marker, on tomato IL6-2, North border of IL6-3	EST (expressed sequence tag)	AA824859, NCBI	CT146	61.9											# PGSC0003DMG400027017	# Soltu.DM.06G028530	53817413..53816582	53749307..53748476	42758042..42757143	# Solyc06g073180
6	FRK-6/2 (Fk)		S. tuberosum	2,197,235,355	Fructokinase (EC2.7.1.4), glycolysis, oxidative pentose phosphate pathway, functional candidate gene for tomato fruit and potato tuber quality QTL, linked to potato QTL for tuber sugar content	Gene	Z12823, NCBI													PGSC0003DMG400026916	Soltu.DM.06G028540	53820952..53817845	53749700..53752940	42761027..42758565	Solyc06g073190
6	TES-0014		S. lycopersicum	295	Tomato microsatellite marker, linked to tomato QRL qTy6.1	SSR (simple sequence repeat)	Ref. 295													PGSC0003DMG400027013	Soltu.DM.06G028640	53884958..53885838	53821442..53821463	42821433..42822313	Solyc06g073290
6	GP285		S. tuberosum	7,8	Potato STS marker (Lysyl tRNA synthetase like)	STS (sequence-tagged-site)	CG783216, NCBI											GP285	57.002	# PGSC0003DMG400026909	# Soltu.DM.06G028670	53919697..53918832	53848300..53856000	42853556..42852703	# Solyc06g073330
6	TG162		S. lycopersicum	19,185,218	Tomato STS marker,	STS (sequence-tagged-site)	TG162, SGN	TG162	63.4	TG162	40,4	TG162	55	TG162	47					# PGSC0003DMG400026909	# Soltu.DM.06G028670	53918418..53918877	53854533..53854992	42852279..42852742	# Solyc06g073330
6	P3c9		S. tuberosum	52.55	Potato EST marker (Ribosomal protein S18, RS18)	EST (expressed sequence tag)	AJ487428, NCBI									P3c9-a	57.003			PGSC0003DMG400027010	Soltu.DM.06G028720	53941100..53942397	53873700..53879900	42873821..42875004	Solyc06g073370
6	CP12		S. tuberosum	1,6,7,8,13,19,52,212	Potato EST marker (Ribosomal protein S14)	EST (expressed sequence tag)	AJ487327, NCBI	CP12	66							CP12	60.001	CP12	51.002	PGSC0003DMG401027007	not annotated	54001013..54002581	53948920..53950630	42920665..42921153	# Solyc06g073430
6	St_At2g43360		S. tuberosum	212	Potato ortholog to Sl_At2g43360 (Catalyzes the conversion of dethiobiotin to biotin)	COS (conserved orthologous sequence)	At2g43360, TAIR									St_At2g43360	59			PGSC0003DMG400026904	Soltu.DM.06G028800	54042823..54037877	53985000..53990500	42949071..42945367	# Solyc06g073430
6	EXO		S. tuberosum	294	Endo-alpha-1,4-glucanase, beta-D-glucan exohydrolase, in potato differential expression between quantitative late blight resistant and susceptible genotype pools, functional candidate gene for potato late blight QRL, associated with potato late blight QRL (rAUDPC) and with QTL for plant maturity	Gene	Spud DB, SGN													PGSC0003DMG402005942	Soltu.DM.06G029160	54326607..54328672	54345170..54347250	43183995..43185958	Solyc06g073760
6	BEL5		S. tuberosum	322	BEL5 transcription factor, functional candidate gene for potato tuber yield and quality QTL	Gene	AF406697, NCBI													PGSC0003DMG400005930	Soltu.DM.06G029500	54678881..54682934	54713900..54709870	43506409..43510317	Solyc06g074120
6*	SP (self pruning)		S. lycopersicum	245,308,309	Tomato SP (self pruning) gene, linked to tomato major QTL for fruit mass and QTL for soluble solids (Brix)	Gene	NM_001247045, NCBI													PGSC0003DMG400007111	Soltu.DM.06G029780	54851574..54853673	54945260..54943160	43636157..43638048	Solyc06g074350
6	CP104		S. tuberosum	6,7,8,17,37	Potato EST marker, linked with potato late blight QRL	EST (expressed sequence tag)	CF802462, NCBI											CP104-d	58	PGSC0003DMG400007147	not annotated	54992652..54990264	55084456..55083982	43755143..43752773	not annotated
6	TG275		S. lycopersicum	19,218	Tomato STS marker	STS (sequence-tagged-site)	TG275, SGN	TG275	68.6	TG275	40,4	TG275	63							not annotated	Soltu.DM.06G030020	55096807..55095526	55193033..55191752	43863410..43862140	Solyc06g074650
6	TG279		S. lycopersicum	19,32,149,242,265,308,311,313	Tomato STS marker, South border of tomato IL6-2, on IL2-3, linked to tomato late blight QRL lb6b, linked to tomato QTL for soluble solids (Brix), flanking tomato QTL for fruit weight and total fruit yield	STS (sequence-tagged-site)	TG279, SGN	TG279	69.6											PGSC0003DMG400007133	Soltu.DM.06G030170	55252706..55253197	55353000..55360100	44011591..44012082	Solyc06g074810
6	CT109		S. lycopersicum	19	Tomato EST marker	EST (expressed sequence tag)	CT109, SGN	CT109	67.6											PGSC0003DMG400007134	Soltu.DM.06G030180	55268001..55267998	55374383..55374380	44024822..44024822	Solyc06g074820
6	S1a2		S. tuberosum	52	Potato EST marker (CDC 48 homologue, bHLH transcription factor-like)	EST (expressed sequence tag)	AJ489100, NCBI									S1a2	66.002			PGSC0003DMG400012003	Soltu.DM.06G030350	55422194..55423240	55520627..55521673	44148537..44149568	Solyc06g074980
6	S1g5		S. tuberosum	52.55	Potato EST marker (Ribosomal protein L12, L15)	EST (expressed sequence tag)	AJ489127, NCBI									S1g5-a	65			PGSC0003DMG400003368	Soltu.DM.06G030560	55619459..55620202	55837540..55838290	44325834..44326589	Solyc06g075180
6	StI004		S. tuberosum	185,218,247	Potato microsatellite marker in potato EST, linked to potato QTL for resistance to S. endobioticum (RSe-VIa)	SSR (simple sequence repeat)	BE471335, NCBI					STI0004	63	StI004	49	StI004	66.003			PGSC0003DMG400003372	Soltu.DM.06G030600	55645514..55642870	55860950..55863590	44359457..44356811	Solyc06g075250
6	At1A09 (AT5G59910)		A. thaliana	52,55	Arabidopsis EST marker (Histone H2B)	EST (expressed sequence tag)	T22855, NCBI; AT5G59910, TAIR									At1A9-c	63			PGSC0003DMG403030312	Soltu.DM.06G031230(a), Soltu.DM.06G004360(b), Soltu.DM.06G030150(c)	56152356..56152721(a), 05737039..5736599(b), 55227045..55226620(c) et al.	56394490..56393800	44788703..44788978(a), 00420258..420533(b), 43984859..43984584(c) et al.
6	P2f2		S. tuberosum	52	Potato EST marker (Miraculin precursor)	EST (expressed sequence tag)	AJ487421, NCBI									P2f2	66.001					no matching position (chr12)	no matching position (chr12)	no matching position (chr12)
6	STM1019		S. tuberosum	218	Potato microsatellite marker in potato hydroxymethylglutaryl coenzyme A reductase (hmgr)	SSR (simple sequence repeat)	L01402, NCBI					STM1019	68									no matching position (chr03)	no matching position (chr03)	no matching position (chr03)
6	At1A06 (AT5G59970)		A. thaliana	52,55	Arabidopsis EST marker (Histone H4)	EST (expressed sequence tag)	T20698, NCBI; AT5G59970, TAIR									At1A6-a	72.002			PGSC0003DMG400030400	Soltu.DM.06G031290(a), Soltu.DM.06G031330(b), Soltu.DM.06G031270(c) et al.	56178240..56177932(a), 56223146..56222838(b), 56171765..56171457(c) et al.	56419830..56420350	44799977..44799732(a), 44831376..44831131(b), 44806229..44805984(c) et al.	Solyc06g075830(a), Solyc06g075930(b), Solyc06g075850(c)
6*	S1c3		S. tuberosum	52,55	Potato EST marker (Metallothionein-like protein, MT2Y)	EST (expressed sequence tag)	AJ489110, NCBI									S1c3-c	69			PGSC0003DMG400030321	Soltu.DM.06G031500	56412003..56413005	56644280..56643280	44959442..44960399	Solyc06g076140
6	TG477		S. lycopersicum	19,308,313,314	Tomato STS marker, linked to tomato QTL for soluble solids (Brix), fruit weight and total yield	STS (sequence-tagged-site)	TG477, SGN	TG477	72											PGSC0003DMG400030322	Soltu.DM.06G031530	56455716..56454370	56686645..56685300	45022407..45021346	Solyc06g076200
6	At2F02 (AT4G17530)		A. thaliana	52	Arabidopsis EST marker (RAB1B, 1C)	EST (expressed sequence tag)	AA042622, NCBI; AT4G17530, TAIR									At2F2-b	32			PGSC0003DMG400030425(a), PGSC0003DMG400020828(b)	Soltu.DM.06G031770(a), Soltu.DM.06G003670(b)	56609642..56609166(a), 04396246..4396734(b)	56843212..56841821(a), 04149694..4151878(b)	45179724..45179248(a), 35853600..35854199(b)	Solyc06g076450(a), Solyc06g060210(b)
6	StTL15A		S. phureja	294,341,385	Thylakoid luminal 15kDa protein, in potato differential expression between quantitative late blight resistant and susceptible genotype pools, functional candidate gene for late blight QRL, associated with potato late blight QRL (MCR)	Gene	Spud DB, SGN													PGSC0003DMG400034939	Soltu.DM.06G031810	56626830..56626171	56859460..56860120	45197472..45196823	Solyc06g076480
6		tLBR6.2 (lb6b, Sh-lb, Sp-lb)	S. lycopersicum, S. pennellii, S. habrochaites (L. hirsutum)	149,261,265	Tomato QTL for resistance to late blight	QRL (quantitative resistance locus)																		41 - 47,2 Mbp
6		pLBR6.4	S. tuberosum	9,10,14,17,65,294,341	Potato QTL for maturity corrected resistance to late blight (MCR)	QRL (quantitative resistance locus)																54 - 58 Mbp	54 - 58 Mbp
6		pM6.2	S. tuberosum	3,75	Potato QTL for plant maturity	QTL (quantitative trait locus)																51 - 58 Mbp	51 - 58 Mbp
6	St_At1g18640		S. tuberosum	212	Potato ortholog to Sl_At1g18640 (3-phosphoserine phosphatase acting in the last step of serine biosynthesis within the chloroplast)	COS (conserved orthologous sequence)	At1g18640, TAIR									St_At1g18640	70.003			PGSC0003DMG400030337	Soltu.DM.06G031830	56657545..56660007	56886700..56892900	45224607..45226713	Solyc06g076480
6	DMG400030426		S. tuberosum	253	17.6 kD class I small heat shock protein, with differential SNP allele frequency between pairs of potato genotype pools with differential tuber yield, SNP causing amino acid change, candidate gene for potato tuber yield QTL	Gene	Spud DB, SGN													PGSC0003DMG400030426	Soltu.DM.06G031840	56661395..56660610	56893290..56894080	45227967..45227167(a), 45238464..45239052(b) et al.	Solyc06g076520(a), Solyc06g076560(b)
6	P3c6		S. tuberosum	52,55	Potato EST marker (beta-1,7,6,8,4,2/3 tubulin)	EST (expressed sequence tag)	AJ487427, NCBI									P3c6-b	70.002			# PGSC0003DMG400030431	# Soltu.DM.06G031950(a), Soltu.DM.06G013160(b), Soltu.DM.06G003500(c)	56710288..56709750(a), 37996660..37996118(b), 04211314..4210770(c)	56943242..56942668	45273578..45273036(a), 23171790..23171248(b), 00914611..915155(c)	# Solyc06g076640(a), Solyc06g035070(b), Solyc06g005910(c)
6	At2A02 (AT5G23860)		A. thaliana	52,55	Arabidopsis EST marker (beta-1,7,6,8,4,2/3 tubulin gene, TUB)	EST (expressed sequence tag)	T41808, NCBI; AT5G23860, TAIR									At2A2-d	70.001			# PGSC0003DMG400030431	# Soltu.DM.06G013160(a), Soltu.DM.06G031950(b)	37996708..37996079(a), 56710336..56709707(b)	56945340..56942400	45275457..45272997(a), 23173795..23171209(b) et al.	# Solyc06g076640(a), Solyc06g035970(b)
6	DMG400030434		S. tuberosum	253	Acyl-CoA thioesterase, gene with differential SNP allele frequency between pairs of potato genotype pools with differential tuber yield, SNPs causing amino acid changes, candidate gene for potato tuber yield QTL	Gene	Spud DB, SGN													PGSC0003DMG400030434	Soltu.DM.06G032000	56750275..56746483	56980820..56984610	45301026..45297608	Solyc06g076690
6	DMG400030438		S. tuberosum	253	Peptide transporter, gene with differential SNP allele frequency between pairs of potato genotype pools with differential tuber yield, SNPs causing amino acid changes, candidate gene for potato tuber yield QTL	Gene	Spud DB, SGN													PGSC0003DMG400030438	Soltu.DM.06G032050	56792302..56788663	57021920..57025570	45338019..45334378	# Solyc06g076750
6	TES1386		S. lycopersicum	295	Tomato microsatellite marker, flanking tomato QRL qTy6.1	SSR (simple sequence repeat)	Ref. 295															no sequence homology	no sequence homology	45334680..45334469	# Solyc06g076750
6	DMG400030441		S. tuberosum	253	Binding protein, gene with differential SNP allele frequency between pairs of potato genotype pools with differential tuber yield, SNPs causing amino acid changes, candidate gene for potato tuber yield QTL	Gene	Spud DB, SGN													PGSC0003DMG400030441	Soltu.DM.06G032150	56876459..56873172	57111860..57115530	45419603..45416597	Solyc06g076850
6	DMG400030356		S. tuberosum	253	UPA14 (upregulated by AvrBs3), gene with differential SNP allele frequency between pairs of potato genotype pools with differential tuber yield, SNPs causing amino acid changes, candidate gene for potato tuber yield QTL	Gene	Spud DB, SGN													PGSC0003DMG400030356	Soltu.DM.06G032260	56967063..56970827	57207310..57211070	45499904..45503689	Solyc06g076950
6	At1A12 (AT3G11940)		A. thaliana	52.55	Arabidopsis EST marker (Ribosomal protein S5, RS5)	EST (expressed sequence tag)	T43530, NCBI; AT3G11940, TAIR									At1A12-a	72.003					no matching position (chr10 & 11)	no matching position (chr10 & 11)	no matching position (chr10 & 11)
6	P8d7		S. tuberosum	52	Potato EST marker (Cyclophilin ROC7, PPIase, EC 5.2.1.8)	EST (expressed sequence tag)	AJ487449, NCBI									P8d7-a	72.001			PGSC0003DMG400030445	Soltu.DM.06G032280	56979808..56976408	57216290..57220090	45511853..45508471	Solyc06g076970
6	At1B09 (AT4G38510)		A. thaliana	52,55	Arabidopsis EST marker (Vacuolar ATP synthase subunit B, At4g38510)	EST (expressed sequence tag)	T88319, NCBI; AT4G38510, TAIR									At1B9-c	73					no matching position (chr01 & 10)	no matching position (chr01 & 10)	no matching position (chr01 & 10)
6	CT206		S. lycopersicum	19,242,309,311,313,321	Tomato EST marker, on tomato IL6-2 and IL6-3, linked to tomato QTL for soluble solids (Brix), total sugar content, fruit weight and total yield	EST (expressed sequence tag)	AA824919 & AA824918, NCBI	CT206	80											PGSC0003DMG400030463	Soltu.DM.06G032780	57333592..57334152	57580260..57580820	45839549..45840125	Solyc06g082470
6	P1f3		S. tuberosum	52	Potato EST marker (Ubiquitin conjugating enzyme, EC6.3.2.19)	EST (expressed sequence tag)	AJ487403, NCBI									P1f3-b	81			PGSC0003DMG400030473	Soltu.DM.06G032900	57433252..57433109	57684700..57689800	45943361..45943225	Solyc06g082595
6	At1B07 (AT1G14320)		A. thaliana	52.55	Arabidopsis EST marker (Ribosomal protein L10, Wilm's tumor supressor)	EST (expressed sequence tag)	T76209, NCBI; AT1G14320, TAIR									At1B7-b	83			PGSC0003DMG400030386	Soltu.DM.06G032940	57460601..57461101	57711930..57714380	45997028..45997528(a), 45982365..45982865(b)	Solyc06g082670(a), Solyc06g082650(b)
6	Cyt-c red 10kD		S. tuberosum	8	Cytochrom c reductase, 10 kD subunit	Gene	X79275, NCBI											Cyt-c red 10kD-b	62.002	PGSC0003DMG400030477		03011363..3015779(a), 57464773..57464598(b)	57714830..57717310	46001305..45999299(a), 01541553..1537390(b)	Solyc06g082595(a), Solyc06g007540(b)
6		tFY6.2 (ydt6.1)	S. lycopersicum, S. peruvianum, S. cheesmanii, S. pennellii, S. parviflorum	242,245,308,311,314	Tomato QTL for total fruit yield	QTL (quantitative trait locus)																		45 - 47 Mbp
6		tFW6.4 (fw-6G, FW6a, FM6b)	S. lycopersicum, S. pennellii, S. pimpinellifolium, S. cheesmanii	197,313,414	Tomato QTL for fruit weight	QTL (quantitative trait locus)																		45 - 47,2 Mbp
6		pTY6.3	S. tuberosum	253	Potato QTL for tuber yield	QTL (quantitative trait locus)																57 - 59 Mbp	57 - 59 Mbp
6	solcap_snp_c2_9308		S. tuberosum	253	Potato SNP marker, differential SNP allele frequency between pairs of potato genotype pools with differential tuber yield	SNP (single nucleotide polymorphism)	Spud DB, http://solcap.msu.edu/potato													PGSC0003DMG400027664	Soltu.DM.06G033070	57541631..57541531	57850109..57850130	46060741..46060643	Solyc06g082810
6	DMG400027682		S. tuberosum	253	RNase NGR2, gene with differential SNP allele frequency between pairs of potato genotype pools with differential tuber yield, SNPs causing amino acid changes, candidate gene for potato tuber yield QTL	Gene	Spud DB, SGN													PGSC0003DMG400027682	Soltu.DM.06G033160	57591331..57586410	57892500..57900200	46102625..46098079	Solyc06g082890
6	St_At1g20050		S. tuberosum	212	Potato ortholog to Sl_At1g20050 (C-8 sterol isomerase )	COS (conserved orthologous sequence)	At1g20050, TAIR									St_At1g20050	80			PGSC0003DMG400027684	Soltu.DM.06G033250	57640004..57637842	57946270..57948790	46143737..46142430	Solyc06g082980
6	solcap_snp_c2_9243		S. tuberosum	253	Potato SNP marker, differential SNP allele frequency between pairs of potato genotype pools with differential tuber yield	SNP (single nucleotide polymorphism)	Spud DB, http://solcap.msu.edu/potato													PGSC0003DMG400027686	Soltu.DM.06G033280	57650817..57650917	57959579..57959600	46154512..46154612	Solyc06g083010
6*	DMG400020173 (MAK)		S. tuberosum	253	Serine/threonine protein kinase (MAK), gene with differential SNP allele frequency between pairs of potato genotype pools with differential tuber yield, SNP causing amino acid change, candidate gene for potato tuber yield QTL, associated with potato tuber yield	Gene	Spud DB, SGN													PGSC0003DMG400020173	Soltu.DM.06G033520	57851158..57858033	58205600..58212500	46299821..46306154	Solyc06g083210
6	TG642		S. lycopersicum	19	Tomato STS marker	STS (sequence-tagged-site)	TG642, SGN	TG642	89.6											PGSC0003DMG400020173 & PGSC0003DMG400020172	Soltu.DM.06G033520 & Soltu.DM.06G033530	57857593..57859037	58212021..58213465	46305715..46307003	Solyc06g083210 & Solyc06g083220
6	DMG400020103 (QUA1)		S. tuberosum	253	Glycosyltransferase QUASIMODO1 (QUA1), gene with differential SNP allele frequency between pairs of potato genotype pools with differential tuber yield, candidate gene for potato tuber yield QTL, associated with potato tuber yield	Gene	Spud DB, SGN													PGSC0003DMG400020103	Soltu.DM.06G033620	57907129..57903562	58257590..58261170	46346291..46342556	Solyc06g083310
6		PLRV.2	S. tuberosum	64	Potato QTL for resistance to Potato Leafroll Virus (PLRV)	QRL (quantitative resistance locus)																~ 56 - 59 Mbp	~ 56 - 59 Mbp
6	GP76		S. tuberosum	1,3,6,7,8,9,13,14,17,52,64,65,75,218	Potato STS marker, linked to potato QRL for late blight and PLRV, distal to potato plant maturity QTL	STS (sequence-tagged-site)	AJ487374, NCBI					GP76	75			GP76	78	GP76	63.001	not annotated	Soltu.DM.06G033630	57909788..57908894	58264191..58263297	46348677..46347856	Solyc06g083320
6	DMG400020100		S. tuberosum	253	Transcriptional activator, gene with differential SNP allele frequency between pairs of potato genotype pools with differential tuber yield, SNPs causing amino acid changes, candidate gene for potato tuber yield QTL	Gene	Spud DB, SGN													PGSC0003DMG400020100	Soltu.DM.06G033650	57921648..57915978	58270400..58276000	46358348..46353292	Solyc06g083350
6	CP61		S. tuberosum	1,6,7,8,19,212,311,314	Potato EST marker (RNA directed RNA polymerase II), distal to tomato QTL for total fruit yield	EST (expressed sequence tag)	CF802504, NCBI	CP61	89.6									CP61	63.002	PGSC0003DMG400020165	Soltu.DM.06G033660	57923941..57925988	58278400..58280850	46360081..46362000	Solyc06g083360
6	TG215		S. lycopersicum	19	Tomato STS marker	STS (sequence-tagged-site)	TG215, SGN	TG215	92.5											PGSC0003DMG400020089	Soltu.DM.06G033920	58110698..58111196	58466278..58466776	46505623..46506125	Solyc06g083550
6	TG193		S. lycopersicum	19,414	Tomato STS marker, distal to tomato QTL MF6b for fruit mass and SS6b for soluble solids	STS (sequence-tagged-site)	TG193, SGN	TG193	94	TG193	54,4									# PGSC0003DMG401020085	# Soltu.DM.06G034010	58168714..58167937	58524423..58523646	46561473..46560691	# Solyc06g083640
6	Solyc06g083640		S. lycopersicum	261	Tomato leucine-rich repeat family protein, candidate gene for tomato late blight QRL	Gene	SGN													# PGSC0003DMG401020085	# Soltu.DM.06G034010	58171895..58163682	58527604..58519393	46564646..46556508	# Solyc06g083640
6	TG314		S. lycopersicum	19,308,309	Tomato STS marker, linked to tomato QRL for late blight (lb6b) and QTL for soluble solids (Brix)	STS (sequence-tagged-site)	TG314, SGN	TG314	94											PGSC0003DMG400020082	Soltu.DM.06G034050	58201325..58201751	58552400..58557700	46593886..46594546	Solyc06g083670
6	St_At4g28530		S. tuberosum	212	Potato ortholog to Sl_At4g28530 (Arabidopsis NAC domain containing protein 74 (anac074))	COS (conserved orthologous sequence)	At4g28530, TAIR									St_At4g28530	109			PGSC0003DMG400020147	Soltu.DM.06G001380(a), Soltu.DM.06G0342308b)	01840087..1839821(a), 58336375..58336641(b)	58697810..58699950	46725750..46726016(a), 02267248..2267547(b)	Solyc06g083850(a), Solyc06g008360(b)
6	TG482		S. lycopersicum	19,314	Tomato STS marker, linked to tomato QTL for total fruit yield	STS (sequence-tagged-site)	TG482, SGN	TG482	95.3											PGSC0003DMG400020145	Soltu.DM.06G034310	58417292..58416713	58780749..58780170	46794224..46793720	Solyc06g083920
6	TG115		S. lycopersicum	6,7,8,16,19,185,218,242	Tomato STS marker, on tomato IL6-4, distal to tomato QTL for fruit yield and soluble solids (Brix)	STS (sequence-tagged-site)	TG115, SGN	TG115	80	TG115	54,4	TG115	69	TG115	63			TG115	64.001	PGSC0003DMG401020059	Soltu.DM.06G034530	58546947..58548345	58913470..58917390	46920220.. 46922093	Solyc06g084120
6	TG221		S. lycopersicum	19,32,149	Tomato STS marker, South border of tomato IL6-3 and IL6-4, linked with tomato late blight QRL lb6b	STS (sequence-tagged-site)	TG221, SGN	TG221	99.1											PGSC0003DMG400024046	Soltu.DM.06G035080	58983935..58983389	59361470..59364900	47206021..47205615	Solyc06g084550
6	GP36		S. tuberosum	1,6,7,8,52	Potato STS marker	STS (sequence-tagged-site)	AJ492254, AJ492253, NCBI											GP36-b	67	not annotated	# Soltu.DM.06G035090	59004876..59004723	58987135..58987595	47215853..47216036	# Solyc06g084570
6*	GP252		S. tuberosum	7,8	Potato STS marker	STS (sequence-tagged-site)	CG783185, NCBI											GP252	64.002	PGSC0003DMG400024036	# Soltu.DM.06G035090	59004080..59004574	59381240..59382270	47215259..47215733	# Solyc06g084570
6	PSTR-u		S. spegazzinii	5	Potato subtelomeric repeat	STS (sequence-tagged-site)	spg108, Ref. 5														intergenic(a,b,c)	59076865..59076666(a), 59075578..59075386(b), 59083461..59083276(c) et al.		no matching position
